# Supplementary material for: Phylogeny-Related Variations in Venomics: A Test in a Subset of Habu Snakes (Protobothrops)
Source: MDPI journal article supplement (doi:10.3390/toxins15050350), 2023-05-21
Supplement: s1 [file s1]

Supplementary table 1 Assignment of the reverse-phase chromatographic fractions from *Protobothrops cornutus* venom to protein families by nESI-MS/MS of selected peptide ions from in-gel digested protein bands separated by SDS-PAGE.

| Peak | %    | MW<br>(kDa) | Peptide Ion |   | Score | MS/MS-derived sequence       | Protein family/species/accession                           |
|------|------|-------------|-------------|---|-------|------------------------------|------------------------------------------------------------|
|      |      |             | m/z         | z |       |                              |                                                            |
| 1    | 0.03 | de novo     | 255.7       | 2 | 55    | PPPIS                        | BPP/CNP; <i>Protobothrops jerdonii</i> ; ~PJD c31701       |
| 2    | 0.75 | de novo     | 248.6       | 2 | 71    | QSKPG                        | BPP/CNP; <i>Protobothrops flavoviridis</i> ; ~P0C7P5       |
|      |      | de novo     | 255.7       | 2 | 59    | PPISP                        |                                                            |
| 3    | 3.05 | -           | 622.3       | 2 | 104   | QSKPGRPPPISP                 | BPP/CNP; <i>P. jerdonii</i> ; ~PJD c31701                  |
|      |      | -           | 475.8       | 2 | 47    | RPPHHIPP                     |                                                            |
| 4    | 2.75 | de novo     | 241.1       | 2 | 80    | QSKPG                        | BPP/CNP; <i>P. flavoviridis</i> ; ~P0C7P5                  |
|      |      | de novo     | 255.7       | 2 | 60    | PPISP                        |                                                            |
| 5    | 0.18 | -           | 670.6       | 3 | 79    | GDWNDDRCTGQSADCPR            | Disintegrin; <i>Protobothrops mucrosquamatus</i> ; ~E9NW26 |
| 6    | 1.90 | 14.5        | 1005.4      | 2 | 79    | GDWNDDRCTGQSADCPR            | Disintegrin; <i>P. mucrosquamatus</i> ; ~E9NW26            |
| 7    | 0.98 | 11.9        | 670.6       | 3 | 64    | GDWNDDRCTGQSADCPR            | Disintegrin; <i>P. mucrosquamatus</i> ; ~E9NW26            |
|      |      |             | 984.4       | 2 | 49    | LSPGAQCADGLCCDQCR            |                                                            |
| 8    | 0.44 | -           | 576.2       | 2 | 58    | CTGQSADCPR                   | Disintegrin; <i>P. mucrosquamatus</i> ; ~E9NW26            |
|      |      |             | 984.4       | 2 | 55    | LSPGAQCADGLCCDQCR            |                                                            |
| 9    | 0.12 | 32.5        | 978.7       | 3 | 66    | AAESECDAESCTGQSAECPTDDFQR    | SVMP-fragment; <i>P. mucrosquamatus</i> ; ~XP_015682631    |
|      |      |             | 801.3       | 3 | 57    | LRPGTQCEDGECCEQCQFK          |                                                            |
|      |      |             | 559.8       | 2 | 53    | LFCVQGPIGK                   |                                                            |
|      |      |             | 623.9       | 2 | 52    | LFCVQGPIGKK                  |                                                            |
|      |      |             | 514.3       | 2 | 43    | IPCAPQDVK                    |                                                            |
|      |      |             | 467.6       | 3 | 42    | IPCAPQDVKCGR                 |                                                            |
|      |      |             | 578.3       | 2 | 42    | KIPCAPQDVK                   |                                                            |
| 10   | 0.51 | 16.0        | 456.8       | 2 | 36    | ETLVPILK                     | VEGF; <i>P. jerdonii</i> ; ~PJD c48748_g1                  |
| 11   | 0.75 | 17.4        | 502.5       | 3 | 54    | CCFVHDCCYGK                  | PLA <sub>2</sub> ; <i>P. mucrosquamatus</i> ; ~Q90W39      |
|      |      |             | 591.3       | 2 | 45    | AAAVCLGHNLR                  |                                                            |
| 12   | 0.01 | 28.9        | -           | - | -     | -                            | Unknown                                                    |
|      | 2.72 | 17.3        | 657.1       | 4 | 95    | KNAIPFYSSYGICYCGWGGQGKPK     | PLA <sub>2</sub> ; <i>P. mucrosquamatus</i> ; ~Q90W39      |
|      |      |             | 1249.1      | 2 | 87    | NAIPFYSSYGICYCGWGGQGKPK      |                                                            |
|      |      |             | 1019.1      | 3 | 86    | NAIPFYSSYGICYCGWGGQGKPKDATDR |                                                            |
|      |      |             | 769.6       | 3 | 79    | CCFVHDCCYGKLTDCSPK           |                                                            |
|      |      | 12.8        | 838.7       | 3 | 69    | TGVIIICGEGTECEKQICECDR       | PLA <sub>2</sub> ; <i>P. flavoviridis</i> ; ~Q805A2        |
|      |      |             | 776.9       | 2 | 57    | TGVIIICGEGTECEK              |                                                            |
| 13   | 4.77 | 17.4        | 657.1       | 4 | 85    | KNAIPFYSSYGICYCGWGGQGKPK     | PLA <sub>2</sub> ; <i>P. mucrosquamatus</i> ; ~Q90W39      |
|      |      |             | 833.0       | 3 | 80    | NAIPFYSSYGICYCGWGGQGKPK      |                                                            |
|      |      |             | 764.6       | 4 | 67    | NAIPFYSSYGICYCGWGGQGKPKDATDR |                                                            |
|      |      |             | 577.5       | 4 | 63    | CCFVHDCCYGKLTDCSPK           |                                                            |
|      |      |             | 591.3       | 2 | 57    | AAAVCLGHNLR                  |                                                            |

| Peak | %     | MW<br>(kDa) | Peptide Ion |   | Score | MS/MS-derived sequence       | Protein family/species/accession                            |
|------|-------|-------------|-------------|---|-------|------------------------------|-------------------------------------------------------------|
|      |       |             | m/z         | z |       |                              |                                                             |
| 14   | 8.75  | 13.1        | 838.7       | 3 | 102   | TGVIIICGEGTECEKQICECDR       | PLA <sub>2</sub> ; <i>P. flavoviridis</i> ; ~Q805A2         |
|      |       |             | 776.9       | 2 | 66    | TGVIIICGEGTECEK              |                                                             |
|      |       | 17.4        | 1019.1      | 3 | 127   | NAIPFYSSYGICYCGWGGQGKPKDATDR | PLA <sub>2</sub> ; <i>P. mucrosquamatus</i> ; ~Q90W39       |
|      |       |             | 657.1       | 4 | 91    | KNAIPFYSSYGICYCGWGGQGKPK     |                                                             |
|      |       |             | 833.0       | 3 | 86    | NAIPFYSSYGICYCGWGGQGKPK      |                                                             |
|      |       |             | 769.6       | 3 | 83    | CCFVHDCCYGKLTDCSPK           |                                                             |
|      |       |             | 591.3       | 2 | 81    | AAAVCLGHNLR                  |                                                             |
|      |       |             | 591.3       | 2 | 69    | AAAVCLGHNLR                  |                                                             |
|      |       | 13.1        | 1032.4      | 2 | 73    | DATDRCCFVHDCCYGK             | PLA <sub>2</sub> ; <i>P. mucrosquamatus</i> ; ~Q90W39       |
|      |       |             | 577.5       | 4 | 49    | CCFVHDCCYGKLTDCSPK           |                                                             |
|      |       |             | 502.5       | 3 | 44    | CCFVHDCCYGK                  |                                                             |
|      |       | 11.2        | 591.3       | 2 | 72    | AAAVCLGHNLR                  | PLA <sub>2</sub> ; <i>P. mucrosquamatus</i> ; ~Q90W39       |
|      |       |             | 657.1       | 4 | 60    | KNAIPFYSSYGICYCGWGGQGKPK     |                                                             |
|      |       |             | 502.5       | 3 | 50    | CCFVHDCCYGK                  |                                                             |
|      |       |             | 833.0       | 3 | 43    | NAIPFYSSYGICYCGWGGQGKPK      |                                                             |
| 15   | 3.73  | 28.4        | 1722.7      | 1 | 86    | TNCPASCFCHNEII               | CRISP; <i>P. jerdonii</i> ; ~Q7ZZN9                         |
|      |       | 21.2        | 583.3       | 2 | 51    | NVDFDSESPR                   | CRISP; <i>P. flavoviridis</i> ; ~1WVR_A                     |
|      | 0.25  | 17.3        | 591.3       | 2 | 68    | AAAVCLGHNLR                  | PLA <sub>2</sub> ; <i>P. mucrosquamatus</i> ; ~Q90W39       |
|      |       |             | 577.5       | 4 | 67    | CCFVHDCCYGKLTDCSPK           |                                                             |
|      |       |             | 657.1       | 4 | 58    | KNAIPFYSSYGICYCGWGGQGKPK     |                                                             |
|      |       |             | 833.0       | 3 | 46    | NAIPFYSSYGICYCGWGGQGKPK      |                                                             |
| 16   | 0.46  | 50.1        | 596.8       | 2 | 42    | IMGWGTTPTK                   | SVSP; <i>Crotalus scutulatus</i> ; ~AUS82544                |
|      |       | 42.9        | 756.8       | 2 | 72    | VIGGDECNINEHR                | SVSP; <i>Gloydus blomhoffii</i> ; ~Q9PT51                   |
|      | 0.04  | 31.1        | 777.3       | 2 | 57    | MEWYPEAAANAER                | CRISP; <i>P. flavoviridis</i> ; ~1WVR_A                     |
|      |       |             | 583.3       | 2 | 49    | NVDFDSESPR                   |                                                             |
|      |       |             | 769.3       | 2 | 46    | MEWYPEAAANAER                |                                                             |
|      |       |             | 589.3       | 2 | 41    | SVNPTASNMLK                  |                                                             |
|      |       |             | 611.8       | 2 | 49    | GNVDFDSESPR                  |                                                             |
|      |       |             | 560.6       | 3 | 78    | FIRIDAACVCVISR               |                                                             |
|      | 0.05  | 19.9        | 556.3       | 2 | 72    | NPNPVPTGCR                   | NGF; <i>P. mucrosquamatus</i> ; ~XP_015667549               |
|      |       |             | 632.3       | 2 | 72    | IDAACVCVISR                  |                                                             |
|      |       |             | 697.3       | 2 | 59    | ALTM <del>E</del> GKQASWR    |                                                             |
|      |       |             | 714.3       | 2 | 54    | CRNPNPVPTGCR                 |                                                             |
|      |       |             | 594.6       | 3 | 41    | HWNSYCTTTHTFVK               |                                                             |
|      |       |             | 962.5       | 1 | 39    | QYFFETK                      |                                                             |
|      |       |             | 591.3       | 2 | 71    | AAAVCLGHNLR                  |                                                             |
|      |       |             | 559.8       | 2 | 35    | TLCAGILEGGK                  |                                                             |
| 17   | 0.28  | 17.4        | 591.3       | 2 | 71    | AAAVCLGHNLR                  | PLA <sub>2</sub> ; <i>P. mucrosquamatus</i> ; ~Q90W39       |
|      | 0.22  | 33.9        | 559.8       | 2 | 35    | TLCAGILEGGK                  | SVSP; <i>P. mucrosquamatus</i> ; ~PMR c29163_g4             |
|      | 19.07 | 18.9        | 1505.5      | 1 | 91    | CCFVHDCCYGK                  | PLA <sub>2</sub> ; <i>Trimeresurus stejnegeri</i> ; ~P82896 |

| Peak | %    | MW<br>(kDa) | Peptide Ion |   | Score | MS/MS-derived sequence             | Protein family/species/accession                         |
|------|------|-------------|-------------|---|-------|------------------------------------|----------------------------------------------------------|
|      |      |             | m/z         | z |       |                                    |                                                          |
| 18   | 0.15 | 15.7        | 871.9       | 2 | 82    | EICECDKAAAICFR                     | PLA <sub>2</sub> ; <i>P. flavoviridis</i> ; ~Q805A2      |
|      |      |             | 838.7       | 3 | 83    | TGVIIICGEGTECEKQICECDR             |                                                          |
|      |      |             | 776.9       | 2 | 80    | TGVIIICGEGTECEK                    |                                                          |
|      |      | 57.9        | 565.3       | 2 | 51    | ILCAGILQGGK                        | SVSP; <i>P. flavoviridis</i> ; ~BAN82037                 |
|      |      |             | 423.2       | 2 | 47    | RMPAQSR                            |                                                          |
|      |      |             | 46.4        | 2 | 72    | VIGGDECNINEHR                      |                                                          |
| 19   | 0.02 | 28.4        | 611.8       | 2 | 55    | GNVDFDSESPR                        | SVSP; <i>Agkistrodon contortrix contortrix</i> ; ~P09872 |
|      |      |             | 19.4        | 2 | 61    | EICECDKAAAICFR                     |                                                          |
|      |      |             | 19.4        | 2 | 61    | EICECDKAAAICFR                     |                                                          |
|      | 2.52 | 57.4        | 550.8       | 2 | 50    | NVPNEDEQR                          | CRISP; <i>V. berus nikolskii</i> ; ~B7FD10               |
|      |      |             | 419.5       | 3 | 49    | NVPNEDEQRR                         |                                                          |
|      |      |             | 50.5        | 3 | 61    | SAHIAPLSLPSNPPSVGSVCR              |                                                          |
| 20   | 5.61 | 34.8        | 679.3       | 2 | 37    | EWVLTAAHCDR                        | PLA <sub>2</sub> ; <i>T. stejnegeri</i> ; ~P82896        |
|      |      |             | 559.3       | 2 | 48    | TLCAGILQGGK                        |                                                          |
|      |      |             | 33.9        | 2 | 58    | DDENDKDIMLIR                       |                                                          |
|      |      | 32.0        | 498.2       | 3 | 46    | DDENDKDIMLIR                       | SVSP; <i>T. stejnegeri</i> ; ~Q8AY80                     |
|      |      |             | 492.9       | 3 | 81    | DDENDKDIMLIR                       |                                                          |
|      |      |             | 498.2       | 3 | 57    | DDENDKDIMLIR                       |                                                          |
| 21   | 1.70 | 19.4        | 492.9       | 3 | 60    | DDENDKDIMLIR                       | SVSP; <i>A. contortrix contortrix</i> ; ~JAV51428        |
|      |      |             | 722.4       | 2 | 39    | VLNEDEQTRDPK                       |                                                          |
|      |      |             | 16.0        | 2 | 62    | VIGGDECNINEHR                      |                                                          |
|      | 0.89 | 16.2        | 58.4        | 2 | 56    | VIGGDECNINEHR                      | SVSP; <i>P. jerdonii</i> ; ~Q9DF66                       |
|      |      |             | 35.7        | 2 | 77    | IIGGDECNINEHR                      |                                                          |
|      |      |             | 573.3       | 2 | 48    | EKFFCLSSK                          |                                                          |
| 22   | 0.44 | 33.9        | 749.8       | 2 | 79    | VVGGDECNINEHR                      | SVSP; <i>C. atrox</i> ; ~AUS82489                        |
|      |      |             | 811.0       | 3 | 65    | VFQQQM <sup>N</sup> WADA EK FCTQQR |                                                          |
|      |      |             | 805.7       | 3 | 65    | VFQQQM <sup>N</sup> WADA EK FCTQQR |                                                          |
|      | 0.60 | 17.9        | 829.8       | 2 | 57    | TTDNQWWSMDCSK                      | SVSP; <i>G. blomhoffii</i> ; ~AAP20637                   |
|      |      |             | 808.4       | 2 | 49    | YNAWSAESECIASK                     |                                                          |
|      |      |             | 756.8       | 2 | 66    | VIGGDECNINEHR                      |                                                          |
| 23   | 0.79 | 76.2        | 42.7        | 2 | 81    | VVGGDECNINEHR                      | SVSP; <i>G. blomhoffii</i> ; ~CAB65936                   |
|      |      |             | 33.9        | 3 | 61    | VVGGDECNINEHR                      |                                                          |
|      |      |             | 500.2       | 3 | 61    | VVGGDECNINEHR                      |                                                          |
|      | 0.60 | 17.9        | 811.0       | 3 | 63    | VFQQQM <sup>N</sup> WADA EK FCTQQR | SVSP; <i>Ovophis okinavensis</i> ; ~AAB34084             |
|      |      |             | 829.8       | 2 | 48    | TTDNQWWSMDCSK                      |                                                          |
|      |      |             | 797.9       | 2 | 43    | VFQQQM <sup>N</sup> WADA EK        |                                                          |
|      | 0.79 | 76.2        | 808.4       | 2 | 40    | YNAWSAESECIASK                     | SVSP; <i>A. contortrix contortrix</i> ; ~P82981          |
|      |      |             | 674.8       | 4 | 82    | SEC DIAESCTGQSADCPDTHYHR           |                                                          |
|      |      |             | 577.3       | 3 | 80    | YSEDLDYGMVDHGK                     |                                                          |
|      |      |             | 742.6       | 3 | 73    | LHSWVECESGECCEQCR                  |                                                          |

| Peak | %    | MW<br>(kDa) | Peptide Ion |   | Score | MS/MS-derived sequence | Protein family/species/accession               |
|------|------|-------------|-------------|---|-------|------------------------|------------------------------------------------|
|      |      |             | m/z         | z |       |                        |                                                |
| 24   | 0.60 | 56.5        | 1013.4      | 2 | 63    | LTPGSQCAEGLCCEQCR      | SVMP; <i>P. mucrosquamatus</i> ; ~XP_029142018 |
|      |      |             | 549.3       | 2 | 48    | FSTEGKLCR              |                                                |
|      |      |             | 664.4       | 2 | 44    | YIELVIVADHR            |                                                |
|      |      | 43.8        | 734.7       | 3 | 92    | HDNAQLLTGMIFNEKIEGR    | SVMP; <i>P. mucrosquamatus</i> ; ~XP_029142018 |
|      |      |             | 1013.4      | 2 | 73    | LTPGSQCAEGLCCEQCR      |                                                |
|      |      |             | 643.0       | 4 | 71    | FSDCSLNQYSNEIIHNHFTSR  |                                                |
|      |      |             | 556.1       | 4 | 65    | IYETANDLNEIYRPLKIR     |                                                |
|      |      |             | 729.4       | 3 | 63    | HDNAQLLTGMIFNEKIEGR    |                                                |
|      |      |             | 664.4       | 2 | 61    | YIELVIVADHR            |                                                |
|      |      |             | 549.3       | 2 | 56    | FSTEGKLCR              |                                                |
|      |      |             | 583.0       | 3 | 56    | HDNAQLLTGMIFNEK        |                                                |
|      |      |             | 532.3       | 2 | 50    | TRPHLVANR              |                                                |
|      |      |             | 651.3       | 3 | 46    | IYETANDLNEIYRPLK       |                                                |
|      |      |             | 414.9       | 3 | 37    | YDGDKTEISSK            |                                                |
|      | 0.89 | 38.7        | 1013.4      | 2 | 70    | LTPGSQCAEGLCCEQCR      | SVMP; <i>T. stejnegeri</i> ; ~P0DM87           |
|      |      |             | 549.3       | 2 | 51    | FSTEGKLCR              |                                                |
|      |      | 33.2        | 718.4       | 3 | 97    | IMGWGTISSTKETYPNVPR    | SVSP; <i>Gloydus intermedius</i> ; ~ASX97880   |
|      |      |             | 713.0       | 3 | 76    | IMGWGTISSTKETYPNVPR    |                                                |
|      |      | 18.2        | 591.3       | 2 | 57    | FCSEQVKGAR             | CTL; <i>P. jerdonii</i> ; ~D1MGU0              |
|      |      |             | 618.8       | 2 | 77    | SAGQLFEESLR            |                                                |
|      | 3.99 | -           | 455.6       | 3 | 61    | SAGQLFEESLRK           | LAAO; <i>P. mucrosquamatus</i> ; ~XP_015673892 |
|      |      |             | 583.4       | 2 | 54    | ITFRPPLPPK             |                                                |
|      |      |             | 618.4       | 2 | 70    | KVTVTYQTPAK            |                                                |
|      |      | -           | 554.3       | 2 | 65    | VTVTYQTPAK             | LAAO; <i>P. flavoviridis</i> ; ~BAN82013       |
|      |      |             | 725.4       | 2 | 95    | VVSLNVLCTECR           |                                                |
|      |      |             | 653.9       | 2 | 86    | QVPVVQAYAFGK           |                                                |
|      |      | -           | 640.2       | 3 | 70    | DCPSDWSSYEGHCYR        | CTL; <i>Trimeresurus albolabris</i> ; ~P81114  |
|      |      |             | 584.3       | 2 | 52    | EQFECLVSR              |                                                |
|      |      |             | 545.8       | 2 | 59    | YGPVSGEIR              |                                                |
|      | 0.94 | 110.0       | 746.8       | 2 | 48    | SVQPQAQSWSCSK          | PDE; <i>Protobothrops elegans</i> ; ~BAP39928  |
|      |      |             | 782.4       | 2 | 60    | CSSITELEKVNQR          |                                                |
|      |      |             | 561.3       | 2 | 48    | NPFYTPSPAK             |                                                |
|      |      | 81.9        | 545.8       | 2 | 46    | YGPVSGEIR              | PDE; <i>P. elegans</i> ; ~BAP39928             |
|      |      |             | 516.8       | 2 | 38    | YCLLHQAQ               |                                                |
|      |      |             | 403.2       | 2 | 38    | ALEMADR                |                                                |
|      |      |             | 457.8       | 2 | 35    | LNLNNQAQ               |                                                |
|      |      |             | 678.3       | 2 | 33    | AATYFWPGSEVK           |                                                |
|      |      |             | 618.8       | 2 | 64    | SAGQLFEESLR            |                                                |
|      | 0.17 | 59.7        | 618.8       | 2 | 64    | SAGQLFEESLR            | LAAO; <i>P. mucrosquamatus</i> ; ~XP_015673893 |
|      |      |             | 618.8       | 2 | 64    | SAGQLFEESLR            |                                                |

| Peak | %            | MW<br>(kDa)  | Peptide Ion |   | Score | MS/MS-derived sequence              | Protein family/species/accession                                                     |
|------|--------------|--------------|-------------|---|-------|-------------------------------------|--------------------------------------------------------------------------------------|
|      |              |              | m/z         | z |       |                                     |                                                                                      |
| 26   | 5.37<br>1.18 | 27.0<br>17.3 | 438.7       | 2 | 61    | STTDLP <sup>SR</sup>                | SVMP; <i>P. jerdonii</i> ; ~Q7ZZS9<br>CTL; <i>P. jerdonii</i> ; ~D1MGU1              |
|      |              |              | 501.2       | 2 | 46    | DVNRASENP                           |                                                                                      |
|      |              |              | 474.8       | 2 | 35    | IVREYIR                             |                                                                                      |
|      |              |              | 655.4       | 2 | 46    | KPQCILNAPLR                         |                                                                                      |
|      |              |              | 829.8       | 2 | 53    | TTDNQWW <sup>SMDCSK</sup>           |                                                                                      |
|      |              |              | 808.4       | 2 | 53    | YNAWSAESECIASK                      |                                                                                      |
|      | 0.05         | 112.0        | 811.0       | 3 | 47    | VFQQQM <sup>NWADA</sup> EKFCTQQR    | CTL; <i>P. mucrosquamatus</i> ; ~XP_015671571                                        |
|      |              |              | 805.9       | 2 | 43    | VFQQQM <sup>NWADA</sup> EK          |                                                                                      |
|      |              |              | 591.3       | 2 | 55    | WVNVYCGQR                           |                                                                                      |
|      |              |              | 655.3       | 2 | 53    | KWVNVYCGQR                          |                                                                                      |
|      |              |              | 466.2       | 3 | 52    | TCLGLEKGTDFR                        |                                                                                      |
|      |              |              | 457.2       | 2 | 40    | FCMEQAK                             |                                                                                      |
|      | 1.06         | 77.6         | 545.8       | 2 | 59    | YGPVSGEIR                           | PDE; <i>P. elegans</i> ; ~BAP39928<br>SVMP; <i>P. mucrosquamatus</i> ; ~XP_029142019 |
|      |              |              | 746.8       | 2 | 47    | SVQPQAQSWSCSK                       |                                                                                      |
|      |              |              | 899.4       | 3 | 89    | SECDAIESCTGQSAD <sup>CPTDHYHR</sup> |                                                                                      |
|      |              |              | 577.3       | 3 | 71    | YSEDLDYGMVDHGTK                     |                                                                                      |
|      |              |              | 587.8       | 2 | 47    | MIPCAPQDVK                          |                                                                                      |
|      |              |              | 552.3       | 2 | 43    | CGKLYCFR                            |                                                                                      |
|      | 0.11         | 57.4         | 412.6       | 3 | 58    | K.KVTVTYQTPAK.D                     | LAAO; <i>P. flavoviridis</i> ; ~BAN82013                                             |
|      |              |              | 626.8       | 2 | 49    | K.SAGQLYEESLR.K                     |                                                                                      |
|      |              |              | 597.8       | 2 | 69    | TPVPAGCYDSK                         |                                                                                      |
|      |              |              | 450.9       | 3 | 57    | RTPVPAGCYDSK                        |                                                                                      |
|      |              |              | 453.2       | 2 | 52    | VADISMAAK                           |                                                                                      |
|      |              |              | 555.3       | 2 | 48    | YSDQTNILR                           |                                                                                      |
|      | 0.98         | 17.9         | 811.0       | 3 | 96    | VFQQQM <sup>NWADA</sup> EKFCTQQR    | CTL; <i>P. jerdonii</i> ; ~D1MGU1                                                    |
|      |              |              | 805.7       | 3 | 78    | VFQQQM <sup>NWADA</sup> EKFCTQQR    |                                                                                      |
|      |              |              | 829.8       | 2 | 66    | TTDNQWW <sup>SMDCSK</sup>           |                                                                                      |
|      |              |              | 808.4       | 2 | 59    | YNAWSAESECIASK                      |                                                                                      |
|      |              |              | 532.2       | 3 | 46    | VFQQQM <sup>NWADA</sup> EK          |                                                                                      |
|      |              |              | 805.9       | 2 | 44    | VFQQQM <sup>NWADA</sup> EK          |                                                                                      |
| 27   | 0.26         | -            | 591.3       | 2 | 66    | WVNVYCGQR                           | CTL; <i>P. mucrosquamatus</i> ; ~XP_015671571                                        |
|      |              |              | 466.2       | 3 | 52    | TCLGLEKGTDFR                        |                                                                                      |
|      |              |              | 555.3       | 2 | 63    | YSDQTNILR                           |                                                                                      |
|      |              |              | 597.8       | 2 | 63    | TPVPAGCYDSK                         |                                                                                      |
|      | 2.88         | -            | 640.2       | 3 | 100   | DCPSDWSSYEGHCYR                     | CTL; <i>T. albolabris</i> ; ~P81114                                                  |
|      |              |              | 584.3       | 2 | 58    | EQFECLVSR                           |                                                                                      |
|      |              |              | 808.4       | 2 | 63    | YNAWSAESECIASK                      |                                                                                      |
|      |              |              | 805.9       | 2 | 49    | VFQQQM <sup>NWADA</sup> EK          |                                                                                      |

| Peak | %    | MW<br>(kDa) | Peptide Ion |   | Score | MS/MS-derived sequence    | Protein family/species/accession               |
|------|------|-------------|-------------|---|-------|---------------------------|------------------------------------------------|
|      |      |             | m/z         | z |       |                           |                                                |
| 28   | 1.74 | 64.4        | 559.8       | 2 | 50    | LFCVQGPIGK                | SVMP; <i>P. mucrosquamatus</i> ; ~XP_015682631 |
|      |      |             | 623.9       | 2 | 45    | LFCVQGPIGKK               |                                                |
|      |      |             | 514.3       | 2 | 44    | IPCAPQDVK                 |                                                |
|      | 2.31 | 54.7        | 1467.6      | 2 | 37    | AAESECDAESC TGQAECPTDDFQR | SVMP; <i>P. flavoviridis</i> ; ~Q90ZI3         |
|      |      |             | 520.3       | 2 | 45    | FKAAGTECR                 |                                                |
|      |      |             | 816.3       | 3 | 38    | AAGTECRAATDECDMADLCTGR    |                                                |
|      |      | 17.9        | 1216.1      | 2 | 83    | VFQQQMNWADA EK FCTQQR     | CTL; <i>P. jerdonii</i> ; ~D1MGU1              |
|      |      |             | 829.8       | 2 | 63    | TTDNQWWSMDCSK             |                                                |
|      |      |             | 808.4       | 2 | 54    | YNAWSAESECIASK            |                                                |
|      |      | 16.3        | 532.2       | 3 | 43    | VFQQQMNWADA EK            | CTL; <i>P. jerdonii</i> ; ~D1MGU1              |
|      |      |             | 805.9       | 2 | 42    | VFQQQMNWADA EK            |                                                |
|      |      |             | 811.0       | 3 | 75    | VFQQQMNWADA EK FCTQQR     |                                                |
|      |      |             | 829.8       | 2 | 48    | TTDNQWWSMDCSK             |                                                |
|      |      |             | 805.9       | 2 | 41    | VFQQQMNWADA EK            |                                                |
|      |      |             | 539.2       | 3 | 35    | YNAWSAESECIASK            |                                                |
| 29   | 5.82 | 63.4        | 978.7       | 3 | 79    | AAESECDAESC TGQAECPTDDFQR | SVMP; <i>P. mucrosquamatus</i> ; ~XP_015682631 |
|      |      |             | 559.8       | 2 | 64    | LFCVQGPIGK                |                                                |
|      |      |             | 623.9       | 2 | 62    | LFCVQGPIGKK               |                                                |
|      |      | 53.8        | 843.3       | 2 | 65    | AATDECDMADLCTGR           | SVMP; <i>P. flavoviridis</i> ; ~Q90ZI3         |
|      |      |             | 567.9       | 3 | 55    | AATDECDMADLCTGR           |                                                |
|      |      | 43.4        | 843.3       | 2 | 60    | AATDECDMADLCTGR           | SVMP; <i>P. flavoviridis</i> ; ~Q90ZI3         |
|      |      |             | 851.3       | 2 | 47    | AATDECDMADLCTGR           |                                                |
|      |      | 34.6        | 843.3       | 2 | 62    | AATDECDMADLCTGR           | SVMP; <i>P. flavoviridis</i> ; ~Q90ZI3         |
|      |      |             | 567.9       | 3 | 50    | AATDECDMADLCTGR           |                                                |
|      |      | 33.2        | 843.3       | 2 | 61    | AATDECDMADLCTGR           | SVMP; <i>P. flavoviridis</i> ; ~Q90ZI3         |
|      |      |             | 567.9       | 3 | 44    | AATDECDMADLCTGR           |                                                |
|      |      | 29.1        | 559.8       | 2 | 60    | LFCVQGPIGK                | SVMP; <i>P. mucrosquamatus</i> ; ~XP_015682631 |
|      |      |             | 623.9       | 2 | 54    | LFCVQGPIGKK               |                                                |
|      |      | 22.8        | 532.6       | 3 | 62    | YIPCAQEDVKCGR             | SVMP; <i>Bothrops jararacussu</i> ; ~Q1PHZ4    |
|      |      |             | 574.9       | 3 | 58    | ENEKYIPCAQEDVK            |                                                |
|      | 3.52 | 17.8        | 1208.1      | 2 | 110   | VFQQQMNWADA EK FCTQQR     | CTL; <i>P. jerdonii</i> ; ~D1MGU1              |
|      |      |             | 1216.1      | 2 | 98    | VFQQQMNWADA EK FCTQQR     |                                                |
|      |      |             | 1658.7      | 1 | 71    | TTDNQWWSMDCSK             |                                                |
|      |      |             | 571.3       | 4 | 61    | KESHLVSFESSEEVDFVVS       |                                                |
|      |      |             | 808.4       | 2 | 61    | YNAWSAESECIASK            |                                                |
|      |      |             | 532.2       | 3 | 49    | VFQQQMNWADA EK            |                                                |
|      |      |             | 805.9       | 2 | 47    | VFQQQMNWADA EK            |                                                |
|      |      | 16.2        | 805.7       | 3 | 82    | VFQQQMNWADA EK FCTQQR     | CTL; <i>P. jerdonii</i> ; ~D1MGU1              |

| Peak | %    | MW<br>(kDa) | Peptide Ion |   | Score | MS/MS-derived sequence         | Protein family/species/accession               |
|------|------|-------------|-------------|---|-------|--------------------------------|------------------------------------------------|
|      |      |             | m/z         | z |       |                                |                                                |
| 30   | 0.32 | 84.7        | 811.0       | 3 | 80    | VFQQQM <u>N</u> WADA EK FCTQQR | SVMP; <i>P. mucrosquamatus</i> ; ~XP_015685802 |
|      |      |             | 829.8       | 2 | 56    | TTDNQWW SMDCSK                 |                                                |
|      |      |             | 808.4       | 2 | 51    | YNAWSAESECIASK                 |                                                |
|      |      |             | 805.9       | 2 | 39    | VFQQQM <u>N</u> WADA EK        |                                                |
|      |      |             | 797.9       | 2 | 35    | VFQQQM <u>N</u> WADA EK        |                                                |
|      |      |             | 823.3       | 3 | 78    | RSECDIAESCTGHSDDCPTDR          |                                                |
|      |      |             | 551.2       | 5 | 72    | SECDIAESCTGHSDDCPTDRFHR        |                                                |
|      | 0.64 | 70.5        | 771.3       | 3 | 67    | SECDIAESCTGHSDDCPTDR           | SVMP; <i>P. mucrosquamatus</i> ; ~XP_015685802 |
|      |      |             | 742.6       | 3 | 69    | LHSWVECESGECCEQCR              |                                                |
|      |      |             | 617.7       | 4 | 62    | RSECDIAESCTGHSDDCPTDR          |                                                |
|      |      |             | 771.3       | 3 | 60    | SECDIAESCTGHSDDCPTDR           |                                                |
|      |      |             | 551.2       | 5 | 60    | SECDIAESCTGHSDDCPTDRFHR        |                                                |
|      |      |             | 467.6       | 3 | 49    | IPCAPQDVKCGR                   |                                                |
|      |      |             | 811.0       | 3 | 82    | VFQQQM <u>N</u> WADA EK FCTQQR | CTL; <i>P. jerdonii</i> ; ~D1MGU1              |
| 31   | 0.48 | 17.4        | 805.7       | 3 | 61    | VFQQQM <u>N</u> WADA EK FCTQQR |                                                |
|      |      |             | 797.9       | 2 | 42    | VFQQQM <u>N</u> WADA EK        |                                                |
|      |      |             | 539.2       | 3 | 40    | YNAWSAESECIASK                 |                                                |
|      |      |             | 640.2       | 3 | 49    | DCPSDWSSYEGHCYR                |                                                |
|      |      |             | 52.4        | 2 | 43    | SVCDLPEQCTGQSADCPTDR           |                                                |
|      |      |             | 805.7       | 3 | 58    | VFQQQM <u>N</u> WADA EK FCTQQR | CTL; <i>P. jerdonii</i> ; ~D1MGU1              |
|      | 0.24 | 17.4        | 811.0       | 3 | 57    | VFQQQM <u>N</u> WADA EK FCTQQR |                                                |
|      |      |             | 808.4       | 2 | 51    | YNAWSAESECIASK                 |                                                |
|      |      |             | 829.8       | 2 | 47    | TTDNQWW SMDCSK                 |                                                |
|      |      |             | 797.9       | 2 | 40    | VFQQQM <u>N</u> WADA EK        |                                                |
|      |      |             | 805.9       | 2 | 38    | VFQQQM <u>N</u> WADA EK        |                                                |
|      |      |             | 811.0       | 3 | 62    | VFQQQM <u>N</u> WADA EK FCTQQR | CTL; <i>P. jerdonii</i> ; ~D1MGU1              |
| 32   | 0.46 | 64.8        | 808.4       | 2 | 55    | YNAWSAESECIASK                 |                                                |
|      |      |             | 551.3       | 4 | 98    | HDNAQLLTGMIFNEKIEGR            | SVMP; <i>P. mucrosquamatus</i> ; ~XP_015681821 |
|      |      |             | 583.0       | 3 | 64    | HDNAQLLTGMIFNEK                |                                                |
|      |      |             | 769.4       | 2 | 62    | IYESVNALNVIFR                  |                                                |
|      |      |             | 729.4       | 3 | 50    | HDNAQLLTGMIFNEKIEGR            |                                                |
|      |      |             | 453.7       | 2 | 50    | YHFVANR                        |                                                |
|      |      |             | 505.8       | 2 | 46    | SVGIVQDHR                      |                                                |
|      | 0.46 | 63.0        | 734.7       | 3 | 80    | HDNAQLLTGMIFNEKIEGR            | SVMP; <i>P. mucrosquamatus</i> ; ~XP_015681821 |
|      |      |             | 769.4       | 2 | 64    | IYESVNALNVIFR                  |                                                |
|      |      |             | 583.0       | 3 | 64    | HDNAQLLTGMIFNEK                |                                                |
|      |      |             | 851.0       | 3 | 62    | DSCSCGANSCIMSETVSNPSSR         |                                                |
|      |      |             | 505.8       | 2 | 49    | SVGIVQDHR                      |                                                |

| Peak | % | MW<br>(kDa) | Peptide Ion |   | Score | MS/MS-derived sequence  | Protein family/species/accession               |
|------|---|-------------|-------------|---|-------|-------------------------|------------------------------------------------|
|      |   |             | m/z         | z |       |                         |                                                |
|      |   |             | 453.7       | 2 | 47    | YHFVANR                 |                                                |
|      |   |             | 437.9       | 3 | 46    | FIELVIVADHR             |                                                |
|      |   |             | 575.3       | 2 | 36    | SRYHFVANR               |                                                |
|      |   |             | 729.4       | 3 | 35    | HDNAQLLTGMIFNEKIEGR     |                                                |
|      |   | 58.8        | 734.7       | 3 | 91    | HDNAQLLTGMIFNEKIEGR     | SVMP; <i>P. mucrosquamatus</i> ; ~XP_015681821 |
|      |   |             | 729.4       | 3 | 76    | HDNAQLLTGMIFNEKIEGR     |                                                |
|      |   |             | 577.6       | 3 | 65    | HDNAQLLTGMIFNEK         |                                                |
|      |   |             | 583.0       | 3 | 61    | HDNAQLLTGMIFNEK         |                                                |
|      |   |             | 769.4       | 2 | 60    | IYESVNALNVIFR           |                                                |
|      |   |             | 453.7       | 2 | 49    | YHFVANR                 |                                                |
|      |   |             | 656.4       | 2 | 49    | FIELVIVADHR             |                                                |
|      |   |             | 575.3       | 2 | 48    | SRYHFVANR               |                                                |
|      |   |             | 505.8       | 2 | 45    | SVGIVQDHR               |                                                |
|      |   | 54.7        | 851.0       | 3 | 42    | DSCSCGANSCIMSETVSNEPSSR |                                                |
|      |   |             | 551.3       | 4 | 89    | HDNAQLLTGMIFNEKIEGR     | SVMP; <i>P. mucrosquamatus</i> ; ~XP_015681821 |
|      |   |             | 547.3       | 4 | 80    | HDNAQLLTGMIFNEKIEGR     |                                                |
|      |   |             | 851.0       | 3 | 69    | DSCSCGANSCIMSETVSNEPSSR |                                                |
|      |   |             | 577.6       | 3 | 68    | HDNAQLLTGMIFNEK         |                                                |
|      |   |             | 583.0       | 3 | 65    | HDNAQLLTGMIFNEK         |                                                |
|      |   |             | 656.4       | 2 | 62    | FIELVIVADHR             |                                                |
|      |   |             | 629.7       | 3 | 61    | RHDNAQLLTGMIFNEK        |                                                |
|      |   |             | 453.7       | 2 | 58    | YHFVANR                 |                                                |
|      |   |             | 505.8       | 2 | 56    | SVGIVQDHR               |                                                |
|      |   |             | 635.0       | 3 | 56    | RHDNAQLLTGMIFNEK        |                                                |
|      |   |             | 845.7       | 3 | 46    | DSCSCGANSCIMSETVSNEPSSR |                                                |
|      |   |             | 583.8       | 2 | 44    | RSVGIVQDHR              |                                                |
|      |   | 43.4        | 729.4       | 3 | 111   | HDNAQLLTGMIFNEKIEGR     | SVMP; <i>P. mucrosquamatus</i> ; ~XP_015681821 |
|      |   |             | 734.7       | 3 | 94    | HDNAQLLTGMIFNEKIEGR     |                                                |
|      |   |             | 684.3       | 3 | 85    | LRPGAQCAEGLCCDQCR       |                                                |
|      |   |             | 629.7       | 3 | 74    | RHDNAQLLTGMIFNEK        |                                                |
|      |   |             | 865.9       | 2 | 74    | HDNAQLLTGMIFNEK         |                                                |
|      |   |             | 769.4       | 2 | 70    | IYESVNALNVIFR           |                                                |
|      |   |             | 476.5       | 4 | 68    | RHDNAQLLTGMIFNEK        |                                                |
|      |   |             | 851.0       | 3 | 68    | DSCSCGANSCIMSETVSNEPSSR |                                                |
|      |   |             | 579.6       | 3 | 66    | MAHELGHNLGLHHDR         |                                                |
|      |   |             | 873.9       | 2 | 64    | HDNAQLLTGMIFNEK         |                                                |
|      |   |             | 585.0       | 3 | 63    | MAHELGHNLGLHHDR         |                                                |
|      |   |             | 656.4       | 2 | 59    | FIELVIVADHR             |                                                |



| Peak | % | MW<br>(kDa) | Peptide Ion |   | Score | MS/MS-derived sequence  | Protein family/species/accession               |
|------|---|-------------|-------------|---|-------|-------------------------|------------------------------------------------|
|      |   |             | m/z         | z |       |                         |                                                |
|      |   |             | 575.3       | 2 | 58    | SRYHFVANR               |                                                |
|      |   |             | 453.7       | 2 | 58    | YHFVANR                 |                                                |
|      |   |             | 845.7       | 3 | 54    | DSCSCGANSCIMSETVSNEPSSR |                                                |
|      |   |             | 490.0       | 3 | 53    | RFIELVIVADHR            |                                                |
|      |   |             | 505.8       | 2 | 47    | SVGIVQDHR               |                                                |
|      |   |             | 583.8       | 2 | 42    | RSVGIVQDHR              |                                                |
|      |   | 19.0        | 684.3       | 3 | 115   | LRPGAQCAEGLCCDQCR       | SVMP; <i>P. mucrosquamatus</i> ; ~XP_015681821 |
|      |   |             | 551.3       | 4 | 102   | HDNAQLLTGMIFNEKIEGR     |                                                |
|      |   |             | 769.4       | 2 | 71    | IYESVNALNVIFR           |                                                |
|      |   |             | 583.0       | 3 | 65    | HDNAQLLTGMIFNEK         |                                                |
|      |   |             | 577.6       | 3 | 58    | HDNAQLLTGMIFNEK         |                                                |
|      |   |             | 729.4       | 3 | 52    | HDNAQLLTGMIFNEKIEGR     |                                                |
|      |   |             | 505.8       | 2 | 51    | SVGIVQDHR               |                                                |
|      |   |             | 437.9       | 3 | 47    | FIELVIVADHR             |                                                |
|      |   |             | 453.7       | 2 | 44    | YHFVANR                 |                                                |

Methionine oxidation is underlined.

Supplementary table 2 Assignment of the reverse-phase chromatographic fractions from *Protobothrops jerdonii* venom to protein families by MALDI-TOF-MS/MS and nESI-MS/MS of selected peptide ions from in-gel digested protein bands separated by SDS-PAGE.

| Peak | %    | MW<br>(kDa) | Peptide Ion |   | Score | MS/MS-derived sequence       | Protein family/species/accession                            |
|------|------|-------------|-------------|---|-------|------------------------------|-------------------------------------------------------------|
|      |      |             | m/z         | z |       |                              |                                                             |
| 1    | 0.09 | -           | 422.0       | 4 | 69    | RLPKSKGASATSAASRP            | BPP/CNP; <i>Protobothrops flavoviridis</i> ; ~P0C7P5        |
|      |      |             | 493.0       | 4 | 63    | HRLPKSKGASATSAASRPM          |                                                             |
|      |      |             | 687.7       | 3 | 59    | AAPHRLPKSKGASATSAASRP        |                                                             |
|      |      |             | 456.3       | 4 | 56    | HRLPKSKGASATSAASRP           |                                                             |
|      |      |             | 981.5       | 2 | 49    | ASGPAAPHRLPKSKGASATSA        |                                                             |
|      |      |             | 401.2       | 3 | 45    | ASGPAAPHRLPK                 |                                                             |
| 2    | 0.18 | -           | 406.6       | 3 | 41    | SGPAAPHRLPKS                 | BPP/CNP; <i>Protobothrops mucrosquamatus</i> ; ~XP_05680879 |
|      |      |             | 410.7       | 2 | 40    | GRPPPISP                     |                                                             |
|      |      |             | 655.4       | 3 | 25    | HHIPPLLVQQAQGSPP             |                                                             |
|      |      |             | 566.8       | 2 | 30    | SKPGRPPPISP                  |                                                             |
|      |      |             | 367.2       | 3 | 20    | LKGLGKKAVGE                  |                                                             |
|      |      |             | 523.3       | 2 | 28    | KPGRPPPISP                   |                                                             |
|      |      |             | 699.4       | 2 | 40    | HQSKPGRPPPISP                |                                                             |
|      |      |             | 529.3       | 2 | 44    | QQAQGSPP                     |                                                             |
| 3    | 1.34 | -           | 459.3       | 2 | 22    | PGRPPPISP                    | BPP/CNP; <i>Protobothrops elegans</i> ; ~M5A7M5             |
|      |      |             | 523.3       | 2 | 34    | KPGRPPPISP                   |                                                             |
|      |      |             | 410.7       | 2 | 34    | GRPPPISP                     |                                                             |
| 4    | 5.32 | -           | 835.4       | 3 | 101   | ASGPAAPHRLPKSKGASATSAASRPM   | BPP/CNP; <i>P. flavoviridis</i> ; ~BAP39952                 |
|      |      |             | 811.8       | 3 | 94    | SGPAAPHRLPKSKGASATSAASRPM    |                                                             |
|      |      |             | 676.9       | 4 | 62    | SGPAAPHRLPKSKGASATSAASRPMRD  |                                                             |
|      |      |             | 676.9       | 4 | 58    | EAASGPAAPHRLPKSKGASATSAASRPM |                                                             |
| 5    | 0.76 | 18.7        | 548.8       | 4 | 42    | AAPHRLPKSKGASATSAASRPM       | Disintegrin; <i>Protobothrops jerdonii</i> ; Q7ZZS9         |
|      |      |             | 1151.4      | 1 | 5     | CTGQSADCPR                   |                                                             |
|      |      |             | 1920.7      | 1 | 83    | GDNPDRCCTGQSADCPR            |                                                             |
| 6    | 0.44 | 19.0        | 1967.8      | 1 | 85    | LSPGAQCADGLCCDQCR            | Disintegrin; <i>P. jerdonii</i> ; Q7ZZS9                    |
|      |      |             | 1015.4      | 1 | 36    | ARGDNPDDR                    |                                                             |
|      |      |             | 1151.5      | 1 | 66    | CTGQSADCPR                   |                                                             |
|      |      |             | 1920.7      | 1 | 68    | GDNPDRCCTGQSADCPR            |                                                             |
| 7    | 5.09 | 9.4         | 1967.8      | 1 | 139   | LSPGAQCADGLCCDQCR            | VEGF; <i>Bitis gabonica</i> ; ~AAR06855                     |
|      |      |             | 451.2       | 2 | 38    | QLELNER                      |                                                             |
| 8    | 5.20 | 9.4         | 2011.8      | 1 | 73    | LTPGSQCAEGLCCDQCR            | Disintegrin; <i>P. jerdonii</i> ; P0C6E4                    |
| 9    | 2.09 | 18.9        | 1180.5      | 1 | 13    | CTGLSDDCPR                   | Disintegrin; <i>P. flavoviridis</i> ; ~P23323               |
|      |      |             | 2011.8      | 1 | 88    | LTPGSQCAEGLCCDQCR            |                                                             |
| 10   | 3.53 | 19.3        | 1180.5      | 1 | 51    | CTGLSDDCPR                   | Disintegrin; <i>P. jerdonii</i> ; P0C6E4                    |
|      |      |             | 1211.5      | 1 | 39    | FARGDYPDDR                   |                                                             |

| Peak | %    | MW<br>(kDa) | Peptide Ion |   | Score | MS/MS-derived sequence    | Protein family/species/accession                         |
|------|------|-------------|-------------|---|-------|---------------------------|----------------------------------------------------------|
|      |      |             | m/z         | z |       |                           |                                                          |
| 11   | 2.10 | 19.2        | 1998.8      | 1 | 90    | GDYPDDRCTGLSDDCPR         | Disintegrin; <i>P. jerdonii</i> ; P0C6E4                 |
|      |      |             | 2011.8      | 1 | 106   | LTPGSQCAEGLCCDQCR         |                                                          |
|      |      |             | 666.9       | 3 | 83    | GDYPDDRCTGLSDDCPR         |                                                          |
|      |      |             | 404.5       | 3 | 58    | FARGDYPDDR                |                                                          |
| 12   | 0.51 | 19.4        | 666.9       | 3 | 81    | GDYPDDRCTGLSDDCPR         | Disintegrin; <i>P. jerdonii</i> ; P0C6E4                 |
|      |      |             | 404.5       | 3 | 55    | FARGDYPDDR                |                                                          |
| 13   | 0.01 | 14.4        | 2011.8      | 1 | 110   | LTPGSQCAEGLCCDQCR         | Disintegrin; <i>P. flavoviridis</i> ; ~P23323            |
|      |      |             | 10.9        | 1 | 113   | LTPGSQCAEGLCCDQCR         | Disintegrin; <i>P. flavoviridis</i> ; ~P23323            |
|      |      |             | 31.3        | 1 | 42    | GNDYGYCR                  | SVMP fragment; <i>P. elegans</i> ; ~BAP39935             |
|      |      | 0.62        | 1083.5      | 1 | 35    | DSCFKGNQK                 |                                                          |
|      |      |             | 1132.5      | 1 | 25    | GNDYGYCRK                 |                                                          |
|      |      |             | 666.9       | 3 | 68    | GDYPDDRCTGLSDDCPR         | Disintegrin; <i>P. jerdonii</i> ; P0C6E4                 |
| 14   | 0.12 | 19.0        | 606.3       | 2 | 52    | FARGDYPDDR                | Disintegrin; <i>P. jerdonii</i> ; P0C6E4                 |
|      |      |             | 14.7        | 2 | 56    | LTPGSQCAEGLCCDQCR         |                                                          |
|      |      |             | 666.9       | 3 | 40    | GDYPDDRCTGLSDDCPR         |                                                          |
|      |      |             | 1004.4      | 1 | 49    | GNDYGYCR                  |                                                          |
|      |      | 32.3        | 1004.4      | 1 | 49    | GNDYGYCR                  | SVMP fragment; <i>P. elegans</i> ; ~BAP39935             |
|      |      |             | 1083.5      | 1 | 36    | DSCFKGNQK                 |                                                          |
|      |      |             | 1132.5      | 1 | 24    | GNDYGYCRK                 |                                                          |
|      |      |             | 1058.5      | 1 | 56    | IACEPQNVK                 |                                                          |
|      |      | 29.7        | 1812.7      | 1 | 134   | QGAQCAEGLCCDQCR           | SVMP fragment; <i>Deinagkistrodon acutus</i> ; ~ALE20769 |
|      |      |             | 2053.8      | 1 | 125   | LKQGAQCAEGLCCDQCR         |                                                          |
|      |      |             | 1025.5      | 1 | 55    | FKGAGTECR                 |                                                          |
|      |      |             | 1058.5      | 1 | 38    | IACEPQNVK                 |                                                          |
|      |      | 0.02        | 1269.5      | 1 | 37    | SAECTDRFQR                | SVMP fragment; <i>Gloydus halys</i> ; ~Q8AW15            |
|      |      |             | 1812.7      | 1 | 96    | QGAQCAEGLCCDQCR           |                                                          |
|      |      |             | 1116.5      | 1 | 54    | LDIYSYSQK                 |                                                          |
|      |      |             | 1505.5      | 1 | 69    | CCFVHDCCYGK               |                                                          |
| 15   | 0.09 | 28.0        | 1567.6      | 1 | 77    | NEDIVCGGGTECEK            | SVMP fragment; <i>P. mucrosquamatus</i> ; ~XP_0568263    |
|      |      |             | 2063.8      | 1 | 49    | DATDRCCFVHDCCYGK          |                                                          |
|      |      |             | 1001.4      | 1 | 48    | GKGNFYCR                  |                                                          |
|      |      |             | 1118.6      | 1 | 38    | LFCVQGPIGK                |                                                          |
|      |      |             | 1155.6      | 1 | 30    | KIPCAPQDVK                |                                                          |
|      |      |             | 2401.9      | 1 | 31    | LRPGTQCEDGECCEQCQFK       |                                                          |
|      |      |             | 2934.1      | 1 | 215   | AAESECDAESCTGQSAECPTDDFQR |                                                          |
| 16   | 0.18 | 20.5        | 962.4       | 1 | 56    | QYFFETK                   | NGF; <i>Gloydus intermedius</i> ; ~ALB06112              |
|      |      |             | 1003.4      | 1 | 60    | EDHPVHNR                  |                                                          |
|      |      |             | 1111.5      | 1 | 73    | NPNPVPTGCR                |                                                          |
|      |      |             | 1263.6      | 1 | 83    | IDAACVCVISR               |                                                          |

| Peak | %    | MW<br>(kDa) | Peptide Ion |   | Score | MS/MS-derived sequence  | Protein family/species/accession                                 |
|------|------|-------------|-------------|---|-------|-------------------------|------------------------------------------------------------------|
|      |      |             | m/z         | z |       |                         |                                                                  |
| 17   | 0.08 | 16.1        | 1427.6      | 1 | 27    | CRNPNPVPTGCR            | VEGF; <i>P. mucrosquamatus</i> ; ~Q330K6                         |
|      |      |             | 1781.8      | 1 | 120   | HWNSYCTTHTFVK           |                                                                  |
|      |      |             | 910.5       | 1 | 37    | IEVMQFK                 |                                                                  |
|      |      |             | 1315.6      | 1 | 35    | EHTACECRPR              |                                                                  |
|      |      |             | 2207.0      | 1 | 48    | IEVMQFKEHTACECRPR       |                                                                  |
|      | 0.02 | 11.0        | 1505.5      | 1 | 35    | CCFVHDCCYGK             | PLA <sub>2</sub> ; <i>Crotalus durissus cumanensis</i> ; ~P86805 |
|      | 8.11 | 16.7        | 1741.8      | 1 | 117   | QICECDKAAAICFR          | PLA <sub>2</sub> ; <i>Trimeresurus stejnegeri</i> ; ~Q6H3C5      |
|      | 0.16 | 12.1        | 910.5       | 1 | 20    | IEVMQFK                 | VEGF; <i>P. mucrosquamatus</i> ; ~Q330K6                         |
|      |      |             | 1315.5      | 1 | 17    | EHTACECRPR              |                                                                  |
| 18   | 0.44 | 21.3        | 1116.5      | 1 | 61    | LDIYSYSQK               | PLA <sub>2</sub> ; <i>P. jerdonii</i> ; Q8JIY9                   |
|      |      |             | 1505.5      | 1 | 73    | CCFVHDCCYGK             |                                                                  |
|      |      |             | 1567.6      | 1 | 99    | NEDIVCGGGTECEK          |                                                                  |
|      |      |             | 2063.8      | 1 | 61    | DATDRCCFVHDCCYGK        |                                                                  |
|      |      |             | 2665.2      | 1 | 129   | LDIYSYSQKNEDIVCGGGTECEK | PLA <sub>2</sub> ; <i>P. jerdonii</i> ; Q8JIY9                   |
|      |      | 16.7        | 1116.6      | 1 | 30    | LDIYSYSQK               |                                                                  |
|      |      |             | 1505.5      | 1 | 56    | CCFVHDCCYGK             |                                                                  |
|      |      |             | 1670.8      | 1 | 79    | AAAICFLDNLGTYNK         |                                                                  |
|      |      |             | 2214.0      | 1 | 8     | EPLTTYLFYACYCGWGGR      |                                                                  |
|      |      |             | 2700.2      | 1 | 38    | EATGKEPLTTYLFYACYCGWGGR |                                                                  |
|      |      |             | -           | - | -     | -                       | Unknown                                                          |
| 19   | 0.01 | 10.4        | -           | - | -     | -                       | Unknown                                                          |
|      | 6.92 | 15.8        | 1116.5      | 1 | 66    | LDIYSYSQK               | PLA <sub>2</sub> ; <i>P. jerdonii</i> ; Q8JIY9                   |
|      |      |             | 1505.5      | 1 | 74    | CCFVHDCCYGK             |                                                                  |
|      |      |             | 1567.6      | 1 | 92    | NEDIVCGGGTECEK          |                                                                  |
| 20   | 0.70 | 34.8        | 1670.8      | 1 | 89    | AAAICFLDNLGTYNK         | PLA <sub>2</sub> ; <i>P. flavoviridis</i> ; ~BAP39949            |
|      |      |             | 980.4       | 1 | 44    | QICECDR                 |                                                                  |
|      |      |             | 1148.5      | 1 | 40    | SDIYSYSWK               |                                                                  |
|      |      |             | 1206.6      | 1 | 88    | AAAVCFGQNLRL            |                                                                  |
|      |      |             | 1552.7      | 1 | 96    | TGVIICGEGTECEK          |                                                                  |
|      |      |             | 1577.6      | 1 | 68    | CCFVHDCCYEK             |                                                                  |
|      |      |             | 2514.1      | 1 | 180   | TGVIICGEGTECEKQICECDR   |                                                                  |
|      |      | 28.8        | 980.4       | 1 | 21    | QICECDR                 | PLA <sub>2</sub> ; <i>P. flavoviridis</i> ; ~S6BAM8              |
|      |      |             | 1148.5      | 1 | 5     | SDIYSYSWK               |                                                                  |
|      |      |             | 1206.6      | 1 | 61    | AAAVCFGQNLRL            |                                                                  |
|      |      |             | 1552.7      | 1 | 79    | TGVIICGEGTECEK          |                                                                  |
|      |      |             | 1577.6      | 1 | 65    | CCFVHDCCYEK             |                                                                  |
|      |      |             | 1577.6      | 1 | 65    | CCFVHDCCYEK             |                                                                  |
|      |      | 21.5        | 980.4       | 1 | 43    | QICECDR                 | PLA <sub>2</sub> ; <i>P. flavoviridis</i> ; ~BAP39949            |
|      |      |             | 1148.5      | 1 | 46    | SDIYSYSWK               |                                                                  |

| Peak | %    | MW<br>(kDa) | Peptide Ion |   | Score | MS/MS-derived sequence      | Protein family/species/accession                      |
|------|------|-------------|-------------|---|-------|-----------------------------|-------------------------------------------------------|
|      |      |             | m/z         | z |       |                             |                                                       |
| 21   | 0.44 | 20.5        | 1206.6      | 1 | 88    | AAAVCFGQNLR                 | PLA <sub>2</sub> ; <i>P. flavoviridis</i> ; ~Q805A2   |
|      |      |             | 1552.7      | 1 | 100   | TGVIICGEGTECEK              |                                                       |
|      |      |             | 1577.6      | 1 | 75    | CCFVHDCCYEK                 |                                                       |
|      |      |             | 2135.8      | 1 | 57    | DATDRCCFVHDCCYEK            |                                                       |
|      |      |             | 2514.1      | 1 | 160   | TGVIICGEGTECEKQICECDR       |                                                       |
|      |      |             | 799.9       | 2 | 106   | AAAVCFGQNLRTYK              |                                                       |
|      |      |             | 723.3       | 3 | 103   | QICECDRAAAVCFGQNLR          |                                                       |
|      |      |             | 402.9       | 3 | 86    | AAAVCFGQNLR                 |                                                       |
|      |      |             | 629.3       | 4 | 84    | TGVIICGEGTECEKQICECDR       |                                                       |
|      |      |             | 776.9       | 2 | 76    | TGVIICGEGTECEK              |                                                       |
|      | 0.29 | 15.0        | 980.4       | 1 | 43    | QICECDR                     | PLA <sub>2</sub> ; <i>P. flavoviridis</i> ; ~BAP39949 |
|      |      |             | 1206.6      | 1 | 88    | AAAVCFGQNLR                 |                                                       |
|      |      |             | 1552.7      | 1 | 96    | TGVIICGEGTECEK              |                                                       |
|      |      |             | 1577.5      | 1 | 57    | CCFVHDCCYEK                 |                                                       |
|      |      |             | 929.5       | 1 | 56    | LQFGLHSK                    |                                                       |
|      |      |             | 1117.6      | 1 | 64    | TLCAGILQGGK                 |                                                       |
|      |      |             | 637.9       | 3 | 49    | VHDCCYEKLTDSPK              |                                                       |
|      |      |             | 784.3       | 2 | 80    | NEDIVCGGGTECEK              |                                                       |
|      |      |             | 1333.1      | 2 | 67    | LDIYSYSQKNEDIVCGGGTECEK     |                                                       |
|      |      |             | 835.9       | 2 | 66    | AAAICFLDNLGTYNK             |                                                       |
| 22   | 0.71 | 51.0        | 1285.1      | 2 | 53    | AAAICFLDNLGTYNKEYNNYSK      | SVSP; <i>T. stejnegeri</i> ; ~Q7QI7                   |
|      |      |             | 929.5       | 1 | 62    | LQFGLHSK                    |                                                       |
|      |      |             | 1117.6      | 1 | 45    | TLCAGILQGGK                 |                                                       |
|      |      |             | 929.5       | 1 | 59    | LQFGLHSK                    |                                                       |
|      |      |             | 1189.6      | 1 | 38    | WDKDIMLIR                   |                                                       |
|      |      |             | 1205.6      | 1 | 22    | WDKDIMLIR                   |                                                       |
|      | 1.45 | 28.7        | 1165.5      | 1 | 94    | NVDFDSESPR                  | CRISP; <i>Echis coloratus</i> ; ~P0DMT4               |
|      |      |             | 1537.6      | 1 | 61    | MEWYPEAAANAER               |                                                       |
|      |      |             | 1553.6      | 1 | 52    | MEWYPEAAANAER               |                                                       |
|      |      |             | 2075.1      | 1 | 127   | KPEIQNEIIDLHNSLR            |                                                       |
| 23   | 0.75 | 39.0        | 583.3       | 2 | 56    | NVDFDSESPR                  | CRISP; <i>P. flavoviridis</i> ; ~6IMF_A               |
|      |      |             | 581.3       | 2 | 45    | SVNPTASNMLK                 |                                                       |
|      |      |             | 769.3       | 2 | 42    | MEWYPEAAANAER               |                                                       |
|      |      |             | 781.4       | 4 | 90    | GNVDFDSESPRKPEIQNEIIDLHNSLR |                                                       |
|      |      | 28.8        | 611.8       | 2 | 64    | GNVDFDSESPR                 | CRISP; <i>Vipera berus nikolskii</i> ; ~B7FDI0        |
|      |      |             | 1505.5      | 1 | 51    | CCFVHDCCYGK                 |                                                       |
|      |      |             | 1741.8      | 1 | 65    | QICECDKAAAICFR              |                                                       |
|      |      |             | 2063.8      | 1 | 46    | DATDRCCFVHDCCYGK            |                                                       |

| Peak | %    | MW<br>(kDa) | Peptide Ion |   | Score | MS/MS-derived sequence       | Protein family/species/accession                           |
|------|------|-------------|-------------|---|-------|------------------------------|------------------------------------------------------------|
|      |      |             | m/z         | z |       |                              |                                                            |
| 24   | 0.50 | 45.0        | 929.5       | 1 | 54    | LQFGLHSK                     | SVSP; <i>P. flavoviridis</i> ; ~A0A077LD42                 |
|      |      |             | 1129.6      | 1 | 68    | FLVALYTFR                    |                                                            |
|      |      |             | 1188.6      | 1 | 51    | WNKDIMLIR                    |                                                            |
|      |      |             | 1204.6      | 1 | 21    | MKLQFGLHSK                   |                                                            |
| 25   | 2.43 | 19.9        | 1505.5      | 1 | 73    | CCFVHDCCYGK                  | PLA <sub>2</sub> ; <i>Trimeresurus hageni</i> ; ~A0A0H3UX6 |
|      |      |             | 1728.7      | 1 | 125   | EVCECDKAAAICFR               |                                                            |
|      |      |             | 929.5       | 1 | 53    | LQFGLHSK                     |                                                            |
|      |      |             | 1204.7      | 1 | 15    | MKLQFGLHSK                   |                                                            |
|      | 1.89 | 49.6        | 1722.8      | 1 | 134   | TLCAGVLQGGTDCNR              | SVSP; <i>P. flavoviridis</i> ; ~A0A077LD42                 |
|      |      |             | 929.5       | 1 | 54    | LQFGLHSK                     |                                                            |
|      |      |             | 1129.6      | 1 | 69    | FLVALYTFR                    |                                                            |
|      |      |             | 1188.7      | 1 | 55    | WNKDIMLIR                    |                                                            |
|      |      |             | 1204.6      | 1 | 33    | WNKDIMLIR                    |                                                            |
|      |      | 31.5        | 1129.6      | 1 | 63    | FLVALYTFR                    |                                                            |
|      |      |             | 1172.6      | 1 | 46    | VFDHLDWIK                    |                                                            |
|      |      |             | 1188.6      | 1 | 59    | WNKDIMLIR                    |                                                            |
|      |      |             | 1204.6      | 1 | 5     | WNKDIMLIR                    |                                                            |
|      | 0.39 | 16.1        | 2055.0      | 1 | 137   | IQLGMHSTNVINEDVQTR           | PLA <sub>2</sub> ; <i>P. flavoviridis</i> ; ~T2HPU3        |
|      |      |             | 2071.0      | 1 | 82    | IQLGMHSTNVINEDVQTR           |                                                            |
|      |      |             | 967.4       | 1 | 42    | EVCECDR                      |                                                            |
|      |      |             | 1505.6      | 1 | 61    | CCFVHDCCYGK                  |                                                            |
|      |      |             | 2063.8      | 1 | 71    | DATDRCCFVHDCCYGK             |                                                            |
|      |      |             | -           | - | -     | -                            |                                                            |
|      |      |             | 968.5       | 1 | 15    | FFCPNRK                      |                                                            |
|      |      |             | 1097.5      | 1 | 30    | EKFFCPNR                     |                                                            |
| 26   | 0.02 | 57.4        | -           | - | -     | -                            | Unknown                                                    |
|      |      |             | -           | - | -     | -                            |                                                            |
|      | 0.36 | 38.6        | 968.5       | 1 | 15    | FFCPNRK                      | SVSP; <i>P. flavoviridis</i> ; ~U3TAG3                     |
|      |      |             | 1097.5      | 1 | 30    | EKFFCPNR                     |                                                            |
|      |      |             | 1129.6      | 1 | 40    | FLVALYTFR                    |                                                            |
|      |      |             | 2055.0      | 1 | 5     | IQLGMHSTNVINEDVQTR           |                                                            |
|      |      | 27.3        | 2071.0      | 1 | 77    | IQLGMHSTNVINEDVQTR           | SVSP; <i>P. jerdonii</i> ; B0ZT25                          |
|      |      |             | 2536.2      | 1 | 85    | ETHPDVPYCANINILDYSVCR        |                                                            |
|      |      |             | -           | - | -     | -                            |                                                            |
|      |      |             | -           | - | -     | -                            |                                                            |
| 27   | 6.06 | 20.7        | -           | - | -     | -                            | Unknown                                                    |
|      |      | 34.3        | 968.4       | 1 | 18    | FFCPNRK                      | SVSP; <i>T. stejnegeri</i> ; ~Q91516                       |
|      |      |             | 1097.5      | 1 | 44    | EKFFCPNR                     |                                                            |
|      |      |             | 2506.1      | 1 | 134   | EIYPDVPHCANINILDHAVCR        |                                                            |
|      |      |             | 2879.4      | 1 | 189   | LDSSVSNSEHIAPLSLPSSPPSVGSVCR |                                                            |
|      |      |             | 3046.4      | 1 | 122   | TIPTKEIYPDVPHCANINILDHAVCR   |                                                            |
|      |      | 29.7        | 1204.6      | 1 | 10    | WNKDIMLIR                    | SVSP; <i>P. elegans</i> ; ~P84788                          |
|      |      |             | 2119.1      | 1 | 158   | SAHIAPLSLPSSPPSVGSVCR        |                                                            |
|      |      |             | 1188.6      | 1 | 53    | WNKDIMLIR                    |                                                            |
|      |      | 26.8        | -           | - | -     | -                            | SVSP; <i>P. mucrosquamatus</i> ; ~Q91510                   |
|      |      |             | -           | - | -     | -                            |                                                            |

| Peak | %    | MW<br>(kDa) | Peptide Ion |   | Score | MS/MS-derived sequence       | Protein family/species/accession                                              |
|------|------|-------------|-------------|---|-------|------------------------------|-------------------------------------------------------------------------------|
|      |      |             | m/z         | z |       |                              |                                                                               |
| 28   | 6.89 | 49.6        | 1204.6      | 1 | 36    | WNKDIMLIR                    | SVSP; <i>P. mucrosquamatus</i> ; ~Q91508<br>SVSP; <i>P. elegans</i> ; ~P84788 |
|      |      |             | 2054.1      | 1 | 139   | VMGWGTITSPQVTLPDVPR          |                                                                               |
|      |      |             | 2119.1      | 1 | 141   | SAHIAPLSLPSSPPSVGSVCR        |                                                                               |
|      |      |             | 2247.2      | 1 | 141   | KSAHIAPLSLPSSPPSVGSVCR       |                                                                               |
|      |      |             | 1035.5      | 2 | 35    | VMGWGTITSPQVTLPDVPR          |                                                                               |
|      |      |             | 436.2       | 3 | 53    | NMEIYLGVHSK                  |                                                                               |
|      |      |             | 645.8       | 2 | 51    | NMEIYLGVHSK                  |                                                                               |
|      |      |             | 820.4       | 2 | 80    | CANINLLDYEVC                 |                                                                               |
|      |      |             | 690.7       | 3 | 66    | VMGWGTITSPQVTLPDVPR          |                                                                               |
|      |      |             | 685.4       | 3 | 48    | VMGWGTITSPQVTLPDVPR          |                                                                               |
|      |      | 30.7        | 1188.6      | 1 | 67    | WNKDIMLIR                    | SVSP; <i>D. acutus</i> ; ~Q918X0                                              |
|      |      |             | 2119.0      | 1 | 152   | SAHIAPLSLPSSPPSVGSVCR        |                                                                               |
|      |      |             | 2247.1      | 1 | 164   | KSAHIAPLSLPSSPPSVGSVCR       |                                                                               |
|      |      |             | 645.8       | 2 | 59    | NMEIYLGVHSK                  |                                                                               |
|      |      | 28.8        | 653.8       | 2 | 59    | NMEIYLGVHSK                  | SVSP; <i>P. elegans</i> ; ~P84788                                             |
|      |      |             | 641.8       | 2 | 48    | INLLDYSECR                   |                                                                               |
|      |      |             | 1035.5      | 2 | 94    | VMGWGTITSPQVTLPDVPR          |                                                                               |
|      |      |             | 1027.5      | 2 | 75    | VMGWGTITSPQVTLPDVPR          |                                                                               |
|      |      | 27.2        | 646.3       | 2 | 59    | DMEIYLGVHSK                  | SVSP; <i>P. mucrosquamatus</i> ; ~Q9508                                       |
|      |      |             | 436.5       | 3 | 54    | DMEIYLGVHSK                  |                                                                               |
|      |      |             | 820.4       | 2 | 43    | CANINLLDYEVC                 |                                                                               |
| 29   | 3.68 | 56.5        | 1152.7      | 1 | 83    | AAKPELPAISR                  | SVSP; <i>P. flavoviridis</i> ; ~T2HQA7                                        |
|      |      |             | 2119.2      | 1 | 165   | SAHIAPLSLPSSPPSVGSVCR        |                                                                               |
|      |      |             | 1037.5      | 1 | 82    | GAHAGLPATSR                  |                                                                               |
|      |      |             | 1189.6      | 1 | 75    | WDKDIMLIR                    |                                                                               |
|      |      |             | 968.5       | 1 | 23    | FFCPNRK                      |                                                                               |
|      |      | 33.2        | 1097.5      | 1 | 27    | EKFFCPNR                     | SVSP; <i>P. flavoviridis</i> ; ~U3TAG3                                        |
|      |      |             | 1205.6      | 1 | 54    | WDKDIMLIR                    |                                                                               |
|      |      |             | 1512.7      | 1 | 92    | VIGGDECNINEHR                |                                                                               |
|      |      |             | 2903.5      | 1 | 193   | LDSPVSNSEHIAPLSLPSSPPSVGSICR |                                                                               |
|      |      |             | 42.1        | - | -     | -                            |                                                                               |
| 30   | 0.33 | 63.0        | 22.8        | - | -     | -                            | Unknown                                                                       |
|      |      |             | 14.7        | - | -     | -                            | Unknown                                                                       |
|      |      |             | 618.8       | 2 | 68    | SAGQLFEESLR                  | LAAO; <i>P. elegans</i> ; ~BAP3995                                            |
|      |      |             | 682.9       | 2 | 67    | SAGQLFEESLRK                 |                                                                               |
|      |      |             | 490.3       | 2 | 46    | EYLIKEGK                     |                                                                               |
|      |      | 55.6        | 618.8       | 2 | 70    | SAGQLFEESLR                  | LAAO; <i>P. elegans</i> ; ~BAP3995                                            |
|      |      |             | 682.9       | 2 | 67    | SAGQLFEESLRK                 |                                                                               |

| Peak | % | MW<br>(kDa) | Peptide Ion |   | Score | MS/MS-derived sequence       | Protein family/species/accession          |
|------|---|-------------|-------------|---|-------|------------------------------|-------------------------------------------|
|      |   |             | m/z         | z |       |                              |                                           |
|      |   |             | 490.3       | 2 | 52    | EYLIKEGK                     |                                           |
|      |   | 48.2        | 588.6       | 4 | 42    | YPVKPSEEGKSAGQLFEESLR        |                                           |
|      |   |             | 618.8       | 2 | 61    | SAGQLFEESLR                  | LAAO; <i>P. elegans</i> ; ~BAP3995        |
|      |   |             | 682.9       | 2 | 60    | SAGQLFEESLRK                 |                                           |
|      |   | 28.2        | 490.3       | 2 | 50    | EYLIKEGK                     |                                           |
|      |   |             | 1058.0      | 2 | 82    | RFDEIVGGMDQLPTSMYR           | LAAO; <i>P. elegans</i> ; ~BAP3995        |
|      |   |             | 588.6       | 4 | 73    | YPVKPSEEGKSAGQLFEESLR        |                                           |
|      |   |             | 711.0       | 3 | 68    | RFDEIVGGMDQLPTSMYR           |                                           |
|      |   |             | 682.9       | 2 | 59    | SAGQLFEESLRK                 |                                           |
|      |   |             | 653.6       | 3 | 57    | FDEIVGGMDQLPTSMYR            |                                           |
|      |   |             | 711.0       | 3 | 54    | RFDEIVGGMDQLPTSMYR           |                                           |
|      |   |             | 988.0       | 2 | 48    | FDEIVGGMDQLPTSMYR            |                                           |
|      |   |             | 716.3       | 3 | 44    | RFDEIVGGMDQLPTSMYR           |                                           |
|      |   | 25.3        | 490.3       | 2 | 41    | EYLIKEGK                     |                                           |
|      |   |             | 711.0       | 3 | 76    | RFDEIVGGMDQLPTSMYR           | LAAO; <i>P. elegans</i> ; ~BAP3995        |
|      |   |             | 705.7       | 3 | 75    | RFDEIVGGMDQLPTSMYR           |                                           |
|      |   |             | 711.0       | 3 | 62    | RFDEIVGGMDQLPTSMYR           |                                           |
|      |   |             | 618.8       | 2 | 62    | SAGQLFEESLR                  |                                           |
|      |   |             | 682.9       | 2 | 57    | SAGQLFEESLRK                 |                                           |
|      |   |             | 988.0       | 2 | 49    | FDEIVGGMDQLPTSMYR            |                                           |
|      |   |             | 716.3       | 3 | 46    | RFDEIVGGMDQLPTSMYR           |                                           |
|      |   | 21.9        | 490.3       | 2 | 45    | EYLIKEGK                     |                                           |
|      |   |             | 618.8       | 2 | 74    | SAGQLFEESLR                  | LAAO; <i>P. elegans</i> ; ~BAP3995        |
|      |   |             | 682.9       | 2 | 70    | SAGQLFEESLRK                 |                                           |
|      |   |             | 784.4       | 3 | 67    | YPVKPSEEGKSAGQLFEESLR        |                                           |
|      |   |             | 716.3       | 3 | 63    | RFDEIVGGMDQLPTSMYR           |                                           |
|      |   |             | 988.0       | 2 | 60    | FDEIVGGMDQLPTSMYR            |                                           |
|      |   |             | 490.3       | 2 | 47    | EYLIKEGK                     |                                           |
| 0.37 |   | 41.9        | 1512.7      | 1 | 58    | VIGGDECNINEHR                | SVSP; <i>G. brevicaudus</i> ; ~P85109     |
|      |   | 34.2        | 2506.2      | 1 | 114   | EIYPDVPHCANINILDHAVCR        | SVSP; <i>T. stejnegeri</i> ; ~Q91516      |
|      |   |             | 2879.4      | 1 | 110   | LDSSVSNSEHIAPLSLPSSPPSVGSVCR |                                           |
|      |   | 30.7        | 2119.1      | 1 | 122   | SAHIAPLSLPSSPPSVGSVCR        | SVSP; <i>P. mucrosquamatus</i> ; ~Q91509  |
|      |   | 22.7        | 987.5       | 1 | 45    | EIYPNVPR                     | SVSP; <i>C. oreganus helleri</i> ; ~TDE97 |
|      |   |             | 1347.7      | 1 | 11    | AAYPWWPVTTTR                 |                                           |
|      |   | 21.2        | 987.5       | 1 | 22    | EIYPNVPR                     | SVSP; <i>C. oreganus helleri</i> ; ~TDE97 |
| 0.27 |   | 13.3        | 666.9       | 3 | 74    | GDYPDDRCTGLSDDCPR            | SVMP; <i>P. jerdonii</i> ; P0C6E4         |
|      |   |             | 590.7       | 2 | 55    | CTGLSDDCPR                   |                                           |



| Peak | %    | MW<br>(kDa) | Peptide Ion |   | Score | MS/MS-derived sequence      | Protein family/species/accession       |
|------|------|-------------|-------------|---|-------|-----------------------------|----------------------------------------|
|      |      |             | m/z         | z |       |                             |                                        |
| 31   | 0.38 | 10.7        | 604.8       | 2 | 52    | LSVGLVQDYSK                 | SVMP; <i>P. jerdonii</i> ; P0C6E4      |
|      |      |             | 1006.4      | 2 | 47    | LTPGSQCAEGLCCDQCR           |                                        |
|      |      |             | 625.6       | 3 | 37    | IHNDAADSTASISACDGLK         |                                        |
|      |      | 65.3        | 1449.7      | 1 | 101   | VVSLNVLCTECR                | 5'NT; <i>P. flavoviridis</i> ; ~T2HRS9 |
|      |      |             | 1555.8      | 1 | 119   | IILGHSGFLEDQR               |                                        |
|      |      |             | 1577.9      | 1 | 98    | HANFPILSANIRPK              |                                        |
|      |      |             | 2421.2      | 1 | 155   | FHECNLGNLICDAVIYNNVR        | 5'NT; <i>P. elegans</i> ; ~BAP39925    |
|      |      |             | 3125.6      | 1 | 136   | ETPVLSNPGPYLEFRDEVEELQNHANK |                                        |
|      |      | 22.8        | 725.4       | 2 | 63    | VVSLNVLCTECR                |                                        |
|      |      |             | 573.6       | 3 | 54    | ETPVLSNPGPYLEFR             |                                        |
|      |      |             | 526.6       | 3 | 53    | HANFPILSANIRPK              |                                        |
|      |      |             | 653.9       | 2 | 47    | QVPVVQAYAFGK                |                                        |
|      |      |             | 513.2       | 2 | 44    | QDCYGGVAR                   |                                        |
|      | 0.31 | 56.1        | 430.2       | 2 | 42    | IINVGSEK                    | LAAO; <i>P. elegans</i> ; ~A0A077L6L4  |
|      |      |             | 948.6       | 1 | 29    | IVREYIR                     |                                        |
|      |      |             | 1178.7      | 1 | 42    | INFRPPLPPK                  |                                        |
|      |      |             | 1236.6      | 1 | 94    | SAGQLFEESLR                 |                                        |
|      |      |             | 1306.8      | 1 | 37    | INFRPPLPPKK                 |                                        |
|      |      |             | 1334.8      | 1 | 36    | RINFRPPLPPK                 |                                        |
|      |      | 45.0        | 1176.1      | 2 | 75    | YPVKPSEEGKSAGQLFEESLR       | LAAO; <i>P. elegans</i> ; ~BAP3995     |
|      |      |             | 634.8       | 2 | 70    | SGTKIFLTCNK                 |                                        |
|      |      |             | 557.0       | 4 | 68    | NCADIVMNDLSLIHQPKK          |                                        |
|      |      |             | 412.9       | 3 | 68    | SAGQLFEESLR                 | LAAO; <i>P. elegans</i> ; ~BAP3995     |
|      |      |             | 682.9       | 2 | 61    | SAGQLFEESLRK                |                                        |
|      |      |             | 699.7       | 3 | 53    | NCADIVMNDLSLIHQPK           |                                        |
|      |      | 41.4        | 490.3       | 2 | 46    | EYLIKEGK                    |                                        |
|      |      |             | 431.9       | 3 | 57    | HDDIFAYEKR                  |                                        |
|      |      |             | 705.7       | 3 | 47    | RFDEIVGGMDQLPTSMYR          |                                        |
|      |      |             | 711.0       | 3 | 47    | RFDEIVGGMDQLPTSMYR          |                                        |
|      |      |             | 581.6       | 3 | 43    | DPGVLYKYPVKPSEEGK           |                                        |
|      |      |             | 716.3       | 3 | 30    | RFDEIVGGMDQLPTSMYR          |                                        |
|      |      |             | 582.3       | 3 | 30    | KDIQAFCYPSMIQK              |                                        |
|      |      |             | 634.3       | 3 | 29    | DTSLVTADYVIVCTTSR           |                                        |
|      |      |             | 618.8       | 2 | 29    | SAGQLFEESLR                 |                                        |
|      |      |             | 711.0       | 3 | 28    | RFDEIVGGMDQLPTSMYR          |                                        |
|      |      |             | 757.9       | 2 | 28    | ETDYEEFLEIAR                |                                        |
|      |      |             | 577.0       | 3 | 27    | KDIQAFCYPSMIQK              |                                        |
|      |      |             | 699.7       | 3 | 27    | NCADIVMNDLSLIHQPK           |                                        |

| Peak | % | MW<br>(kDa) | Peptide Ion |   | Score | MS/MS-derived sequence | Protein family/species/accession   |
|------|---|-------------|-------------|---|-------|------------------------|------------------------------------|
|      |   |             | m/z         | z |       |                        |                                    |
|      |   |             | 800.9       | 2 | 23    | DIQAFCYPSMIQK          |                                    |
|      |   |             | 438.7       | 2 | 23    | STTDLPSR               |                                    |
|      |   |             | 569.3       | 2 | 21    | HDDIFAYEK              |                                    |
|      |   |             | 682.9       | 2 | 21    | SAGQLFEESLRK           |                                    |
|      |   | 33.8        | 618.8       | 2 | 75    | SAGQLFEESLR            | LAAO; <i>P. elegans</i> ; ~BAP3995 |
|      |   |             | 784.4       | 3 | 69    | YPVKPSEEGKSAGQLFEESLR  |                                    |
|      |   |             | 682.9       | 2 | 63    | SAGQLFEESLRK           |                                    |
|      |   | 30.7        | 711.0       | 3 | 70    | RFDEIVGGMDQLPTSMYR     | LAAO; <i>P. elegans</i> ; ~BAP3995 |
|      |   |             | 682.9       | 2 | 67    | SAGQLFEESLRK           |                                    |
|      |   |             | 711.0       | 3 | 67    | RFDEIVGGMDQLPTSMYR     |                                    |
|      |   |             | 716.3       | 3 | 64    | RFDEIVGGMDQLPTSMYR     |                                    |
|      |   |             | 490.3       | 2 | 50    | EYLIKEGK               |                                    |
|      |   |             | 988.0       | 2 | 44    | FDEIVGGMDQLPTSMYR      |                                    |
|      |   |             | 423.6       | 3 | 31    | SGTKIFLTCNK            |                                    |
|      |   |             | 512.3       | 2 | 31    | IFLTCNK                |                                    |
|      |   |             | 422.7       | 2 | 26    | AIEEKVR                |                                    |
|      |   |             | 664.3       | 3 | 25    | FDEIVGGMDQLPTSMYR      |                                    |
|      |   |             | 448.2       | 2 | 24    | IFLTCNK                |                                    |
|      |   |             | 699.7       | 3 | 23    | NCADIVMNDLSLIHQLPK     |                                    |
|      |   | 28.8        | 581.6       | 3 | 68    | DPGVLYKYPVKPSEEGK      | LAAO; <i>P. elegans</i> ; ~BAP3995 |
|      |   |             | 618.8       | 2 | 68    | SAGQLFEESLR            |                                    |
|      |   |             | 711.0       | 3 | 66    | RFDEIVGGMDQLPTSMYR     |                                    |
|      |   |             | 757.9       | 2 | 52    | ETDYEEFLEIAR           |                                    |
|      |   |             | 682.9       | 2 | 51    | SAGQLFEESLRK           |                                    |
|      |   |             | 716.3       | 3 | 49    | RFDEIVGGMDQLPTSMYR     |                                    |
|      |   |             | 784.4       | 3 | 46    | YPVKPSEEGKSAGQLFEESLR  |                                    |
|      |   |             | 577.0       | 3 | 45    | KDIQAFCYPSMIQK         |                                    |
|      |   |             | 438.7       | 2 | 42    | STTDLPSR               |                                    |
|      |   |             | 532.7       | 2 | 41    | NPLEECFR               |                                    |
|      |   |             | 550.9       | 3 | 37    | NDKEGWYANLGPMR         |                                    |
|      |   |             | 490.3       | 2 | 37    | EYLIKEGK               |                                    |
|      |   |             | 582.3       | 3 | 37    | KDIQAFCYPSMIQK         |                                    |
|      |   |             | 705.7       | 3 | 35    | RFDEIVGGMDQLPTSMYR     |                                    |
|      |   |             | 508.6       | 3 | 34    | YDTYSTKEYLIK           |                                    |
|      |   |             | 634.3       | 3 | 33    | DTSLV TADYVIVCTTSR     |                                    |
|      |   |             | 556.3       | 3 | 32    | NDKEGWYANLGPMR         |                                    |
|      |   |             | 474.8       | 2 | 32    | IVREYIR                |                                    |
|      |   |             | 988.0       | 2 | 28    | FDEIVGGMDQLPTSMYR      |                                    |

| Peak | %    | MW<br>(kDa) | Peptide Ion |   | Score | MS/MS-derived sequence | Protein family/species/accession              |
|------|------|-------------|-------------|---|-------|------------------------|-----------------------------------------------|
|      |      |             | m/z         | z |       |                        |                                               |
| 32   | 0.02 | 21.6        | 567.3       | 2 | 27    | YPVKPSEEGK             | LAAO; <i>P. elegans</i> ; ~BAP3995            |
|      |      |             | 422.7       | 2 | 26    | AIEEKVR                |                                               |
|      |      |             | 501.2       | 2 | 25    | DVNRASE                |                                               |
|      |      |             | 589.9       | 2 | 21    | INFRPPLPPK             |                                               |
|      |      |             | 448.2       | 2 | 21    | IFLTCNK                |                                               |
|      |      |             | 512.3       | 2 | 20    | IFLTCNKK               |                                               |
|      |      |             | 808.9       | 2 | 15    | DIQAFICYPSMIQK         |                                               |
|      |      |             | 711.0       | 3 | 74    | RFDEIVGGMDQLPTSMYR     |                                               |
|      |      |             | 618.8       | 2 | 62    | SAGQLFEESLR            |                                               |
|      |      |             | 682.9       | 2 | 60    | SAGQLFEESLRK           |                                               |
|      |      |             | 577.0       | 3 | 56    | KDIQAFICYPSMIQK        |                                               |
|      |      |             | 567.3       | 2 | 55    | YPVKPSEEGK             |                                               |
|      |      |             | 423.6       | 3 | 53    | SGTKIFLTCNK            |                                               |
|      |      |             | 463.6       | 3 | 49    | KFWEDDGIHGGK           |                                               |
|      |      |             | 705.7       | 3 | 49    | RFDEIVGGMDQLPTSMYR     |                                               |
|      |      |             | 438.7       | 2 | 49    | STDLPSR                |                                               |
|      | 0.28 | 25.2        | 530.3       | 4 | 48    | FWEDDGIHGGKSTDLPSR     | SVSP; <i>P. elegans</i> ; ~P84788             |
|      |      |             | 711.0       | 3 | 47    | RFDEIVGGMDQLPTSMYR     |                                               |
|      |      |             | 716.3       | 3 | 46    | RFDEIVGGMDQLPTSMYR     |                                               |
|      |      |             | 1290.7      | 1 | 51    | NMEIYLGIVHVK           |                                               |
|      |      |             | 2119.1      | 1 | 129   | SAHIAPLSLPSSPPSVGSVCR  |                                               |
|      |      |             | 2247.2      | 1 | 74    | KSAHIAPLSLPSSPPSVGSVCR |                                               |
|      |      |             | 1292.6      | 1 | 65    | DYYQTFLTNK             |                                               |
|      |      |             | 1309.7      | 1 | 65    | KPQCILNAPLR            | SVMP; <i>P. jerdonii</i> ; Q7ZZS9             |
|      | 0.09 | 16.1        | 2130.0      | 1 | 111   | LFSDCSKDYYQTFLTNK      |                                               |
|      |      |             | 2147.1      | 1 | 64    | DLITVQADAPTTAGLFGDWR   |                                               |
|      |      |             | 993.5       | 1 | 52    | SYVWIGLR               |                                               |
|      |      |             | 1410.7      | 1 | 92    | TCLGLEKETGFR           | CTL; <i>P. flavoviridis</i> ; ~Q7LZ7          |
|      | 0.14 | 10.7        | -           | - | -     | -                      |                                               |
|      | 0.15 | 109.1       | 540.9       | 3 | 65    | KSVQPQAQSWSCSK         | Unknown<br>PDE; <i>P. elegans</i> ; ~BAP39928 |
|      |      |             | 746.8       | 2 | 50    | SVQPQAQSWSCSK          |                                               |
|      | 1.57 | 104.9       | 1180.5      | 2 | 40    | EQSSPLSCFPVSPDVSGCR    | PDE; <i>P. flavoviridis</i> ; ~BAN82023       |
|      |      | 57.4        | 948.6       | 1 | 18    | IVREYIR                | LAAO; <i>P. elegans</i> ; ~A0A077L6L4         |
|      |      |             | 1178.7      | 1 | 31    | INFRPPLPPK             |                                               |
|      |      |             | 1236.6      | 1 | 92    | SAGQLFEESLR            |                                               |
|      |      |             | 1306.8      | 1 | 14    | INFRPPLPPKK            |                                               |
|      |      |             | 1334.8      | 1 | 17    | RINFRPPLPPK            |                                               |
|      |      |             | 1364.7      | 1 | 10    | SAGQLFEESLRK           |                                               |

| Peak | %    | MW<br>(kDa) | Peptide Ion |   | Score | MS/MS-derived sequence      | Protein family/species/accession              |
|------|------|-------------|-------------|---|-------|-----------------------------|-----------------------------------------------|
|      |      |             | m/z         | z |       |                             |                                               |
| 33   | 0.03 | 55.1        | 711.0       | 3 | 72    | RFDEIVGGMDQLPTSMYR          | LAAO; <i>P. elegans</i> ; ~BAP3995            |
|      |      |             | 618.8       | 2 | 64    | SAGQLFEESLR                 |                                               |
|      |      |             | 711.0       | 3 | 64    | RFDEIVGGMDQLPTSMYR          |                                               |
|      |      |             | 682.9       | 2 | 52    | SAGQLFEESLRK                |                                               |
|      |      |             | 490.3       | 2 | 45    | EYLIKEGK                    |                                               |
|      |      | 34.7        | 618.8       | 2 | 53    | SAGQLFEESLR                 | LAAO; <i>P. mucrosquamatus</i> ; ~XP_05673893 |
|      |      |             | 438.7       | 2 | 39    | STTDLPSR                    |                                               |
|      |      |             | 540.9       | 3 | 62    | KSVQPQAQSWSCSK              |                                               |
|      |      |             | 746.8       | 2 | 53    | SVQPQAQSWSCSK               |                                               |
|      |      |             | 705.7       | 3 | 71    | RFDEIVGGMDQLPTSMYR          |                                               |
|      | 0.11 | 57.0        | 711.0       | 3 | 59    | RFDEIVGGMDQLPTSMYR          | LAAO; <i>P. elegans</i> ; ~BAP3995            |
|      |      |             | 577.0       | 3 | 53    | KDIQAFICYPSMIQK             |                                               |
|      |      |             | 682.9       | 2 | 52    | SAGQLFEESLRK                |                                               |
|      |      |             | 423.6       | 3 | 49    | SGTKIFLTCNK                 |                                               |
|      |      |             | 711.0       | 3 | 46    | RFDEIVGGMDQLPTSMYR          |                                               |
|      |      | 34.7        | 490.3       | 2 | 44    | EYLIKEGK                    | SVMP; <i>P. jerdonii</i> ; P0C6E4             |
|      |      |             | 604.8       | 2 | 57    | LSVGLVQDYSK                 |                                               |
|      |      |             | 686.9       | 2 | 51    | LAIVVDYGYMYTK               |                                               |
|      |      |             | 590.7       | 2 | 49    | CTGLSDDCPR                  |                                               |
|      |      |             | 694.9       | 2 | 44    | LAIVVDYGYMYTK               |                                               |
|      | 8.59 | 25.3        | 933.5       | 1 | 69    | DSDKITVR                    | SVMP; <i>P. jerdonii</i> ; P0C6E4             |
|      |      |             | 2569.3      | 1 | 120   | NDYQTFLTNYKQCILNAPLR        |                                               |
|      |      |             | 3406.6      | 1 | 158   | LFSDCSKNDYQTFLTNYKQCILNAPLR |                                               |
|      |      | 16.7        | 694.9       | 2 | 41    | LAIVVDYGYMYTK               | SVMP; <i>P. jerdonii</i> ; P0C6E4             |
|      |      |             | 604.8       | 2 | 37    | LSVGLVQDYSK                 |                                               |
|      |      |             | 1006.4      | 2 | 32    | LTPGSQCAEGLCCDQCR           |                                               |
|      |      |             | 666.9       | 3 | 32    | GDYPDDRCTGLSDDCPR           |                                               |
|      |      |             | 466.6       | 3 | 31    | SHDCAHLLTDTK                |                                               |
|      |      | 11.0        | 590.7       | 2 | 28    | CTGLSDDCPR                  | SVMP; <i>P. jerdonii</i> ; P0C6E4             |
|      |      |             | 1006.4      | 2 | 66    | LTPGSQCAEGLCCDQCR           |                                               |
|      |      |             | 666.9       | 3 | 64    | GDYPDDRCTGLSDDCPR           |                                               |
|      |      |             | 604.8       | 2 | 60    | LSVGLVQDYSK                 |                                               |
|      |      |             | 686.9       | 2 | 59    | LAIVVDYGYMYTK               |                                               |
| 34   | 0.01 | 109.1       | 466.6       | 3 | 57    | SHDCAHLLTDTK                | PDE; <i>P. elegans</i> ; ~BAP39928            |
|      |      |             | 590.7       | 2 | 55    | CTGLSDDCPR                  |                                               |
|      |      |             | 540.9       | 3 | 63    | KSVQPQAQSWSCSK              |                                               |
|      |      |             | 596.1       | 4 | 61    | AKRPDFYTLYIEEPDTTGHK        |                                               |
|      |      |             | 746.8       | 2 | 35    | SVQPQAQSWSCSK               |                                               |

| Peak | %    | MW<br>(kDa) | Peptide Ion |   | Score | MS/MS-derived sequence | Protein family/species/accession      |
|------|------|-------------|-------------|---|-------|------------------------|---------------------------------------|
|      |      |             | m/z         | z |       |                        |                                       |
|      |      | 102.2       | 1121.6      | 1 | 23    | NPFYTPSPAK             | PDE; <i>P. flavoviridis</i> ; ~T2HP62 |
|      |      |             | 1355.7      | 1 | 10    | AATYFWPGSEVK           |                                       |
|      |      |             | 1924.0      | 1 | 16    | VRDVELLTGLNFYSGLK      |                                       |
|      |      |             | 2360.1      | 1 | 34    | EQSSPLSCPFGVPVSPDVSQCR |                                       |
|      | 0.02 | 67.6        | 2405.2      | 1 | 20    | TESEAHNLPYGRPQVLQNHSK  | 5'NT; <i>P. elegans</i> ; ~BAP39925   |
|      |      |             | 513.2       | 2 | 52    | QDCYGGVAR              |                                       |
|      |      |             | 408.2       | 3 | 51    | MGKVYPAVEGR            |                                       |
|      |      |             | 445.7       | 2 | 51    | VYPAVEGR               |                                       |
|      |      |             | 513.2       | 2 | 46    | NYSSQEIGK              | 5'NT; <i>P. elegans</i> ; ~BAP39925   |
|      |      | 41.7        | 725.4       | 2 | 70    | VVSLNVLCTECR           |                                       |
|      |      |             | 523.9       | 3 | 66    | HGQGMGELLQVSGIK        |                                       |
|      |      |             | 519.3       | 3 | 63    | IHALGHSGFLEDQR         |                                       |
|      |      |             | 513.2       | 2 | 51    | QDCYGGVAR              |                                       |
|      |      |             | 653.9       | 2 | 47    | QVPVVQAYAFQK           |                                       |
|      |      |             | 686.0       | 3 | 45    | ASGNPILLNKDISEDQDVK    |                                       |
|      |      |             | 476.3       | 2 | 44    | VGIIGYTTK              |                                       |
|      | 0.05 | 57.9        | 430.2       | 2 | 41    | IINVGSEK               | LAAO; <i>P. elegans</i> ; ~BAP3995    |
|      |      |             | 423.6       | 3 | 67    | SGTKIFLTCNK            |                                       |
|      |      |             | 699.7       | 3 | 59    | NCADIVMNDLSLIHQLPK     |                                       |
|      |      |             | 557.0       | 4 | 58    | NCADIVMNDLSLIHQLPK     |                                       |
|      |      | 55.1        | 784.4       | 3 | 104   | YPVKPSEEGKSAGQLFEESLR  | LAAO; <i>P. elegans</i> ; ~BAP3995    |
|      |      |             | 618.8       | 2 | 66    | SAGQLFEESLR            |                                       |
|      |      |             | 634.8       | 2 | 65    | SGTKIFLTCNK            |                                       |
|      |      |             | 682.9       | 2 | 60    | SAGQLFEESLRK           |                                       |
|      |      |             | 490.3       | 2 | 53    | EYLIKEGK               | LAAO; <i>P. elegans</i> ; ~BAP3995    |
|      |      |             | 694.4       | 3 | 46    | NCADIVMNDLSLIHQLPK     |                                       |
|      |      |             | 699.7       | 3 | 43    | NCADIVMNDLSLIHQLPK     |                                       |
|      |      | 33.0        | 618.8       | 2 | 63    | SAGQLFEESLR            |                                       |
|      |      |             | 634.3       | 3 | 54    | DTSLVTADYVIVCTTSR      | LAAO; <i>P. elegans</i> ; ~BAP3995    |
|      |      |             | 682.9       | 2 | 53    | SAGQLFEESLRK           |                                       |
|      |      |             | 582.3       | 3 | 48    | KDIQAFCYPSMIQK         |                                       |
|      |      | 32.3        | 711.0       | 3 | 86    | RFDEIVGGMDQLPTSMYR     |                                       |
|      |      |             | 618.8       | 2 | 63    | SAGQLFEESLR            | LAAO; <i>P. elegans</i> ; ~BAP3995    |
|      |      |             | 951.0       | 2 | 61    | DTSLVTADYVIVCTTSR      |                                       |
|      |      |             | 577.0       | 3 | 55    | KDIQAFCYPSMIQK         |                                       |
|      |      |             | 757.9       | 2 | 53    | ETDYEEFLEIAR           |                                       |
|      |      |             | 569.3       | 2 | 51    | HDDIFAYEK              |                                       |
|      |      |             | 582.3       | 3 | 50    | KDIQAFCYPSMIQK         |                                       |

| Peak | % | MW<br>(kDa) | Peptide Ion |   | Score | MS/MS-derived sequence        | Protein family/species/accession                                                                                                 |
|------|---|-------------|-------------|---|-------|-------------------------------|----------------------------------------------------------------------------------------------------------------------------------|
|      |   |             | m/z         | z |       |                               |                                                                                                                                  |
| 0.09 |   | 48.7        | 490.3       | 2 | 47    | EYLIKEGK                      | SVSP; <i>Calloselasma rhodostoma</i> ; ~P26324<br>SVSP; <i>P. flavoviridis</i> ; ~T2HQA7<br>SVSP; <i>T. stejnegeri</i> ; ~Q91516 |
|      |   |             | 659.0       | 3 | 45    | FDEIVGGMDQLPTSMYR             |                                                                                                                                  |
|      |   |             | 1512.7      | 1 | 94    | VIGGDECNINEHR                 |                                                                                                                                  |
|      |   |             | 2119.1      | 1 | 34    | SAHIAPLSLPSSPPSVGSVCR         |                                                                                                                                  |
|      |   |             | 968.5       | 1 | 16    | FFCPNRK                       |                                                                                                                                  |
|      |   |             | 1097.5      | 1 | 45    | EKFFCPNR                      |                                                                                                                                  |
|      |   |             | 2506.2      | 1 | 115   | EIYPDVPHCANINILDHAVCR         |                                                                                                                                  |
|      |   |             | 2879.5      | 1 | 185   | LDSSVSNSEHIAPLSLPSSPPSVGSVCR  |                                                                                                                                  |
|      |   |             | 3046.6      | 1 | 122   | TIPTKEIYPDVPHCANINILDHAVCR    |                                                                                                                                  |
|      |   |             | 792.3       | 3 | 53    | GAGTECRAASSECDMADLCTGR        |                                                                                                                                  |
| 1.13 |   | 38.6        | 548.6       | 3 | 41    | AASSECDMADLCTGR               | SVMP; <i>P. mucrosquamatus</i> ; ~XP_02942320<br>SVMP; <i>P. flavoviridis</i> ; ~P20165<br>SVMP; <i>P. jerdonii</i> ; P0C6E4     |
|      |   |             | 1129.5      | 1 | 51    | NDYQTFLTK                     |                                                                                                                                  |
|      |   |             | 1966.9      | 1 | 100   | LFSDCSKNDYQTFLTK              |                                                                                                                                  |
|      |   |             | 933.5       | 1 | 26    | DSDKITVR                      |                                                                                                                                  |
|      |   |             | 1208.6      | 1 | 71    | LSVGLVQDYSK                   |                                                                                                                                  |
|      |   |             | 1388.7      | 1 | 4     | LAIVVDYGM <sup>+</sup> YTK    |                                                                                                                                  |
|      |   |             | 2569.3      | 1 | 118   | NDYQTFLTNYKPOCILNAPLR         |                                                                                                                                  |
|      |   |             | 609.9       | 3 | 60    | CDTCIMSAVISDKPSK              |                                                                                                                                  |
|      |   |             | 604.6       | 3 | 53    | CDTCIMSAVISDKPSK              |                                                                                                                                  |
|      |   |             | 647.6       | 4 | 49    | SHDCAHLLTDTKLDDNTIGVAYK       |                                                                                                                                  |
| 24.0 |   |             | 668.9       | 2 | 40    | LDDNTIGVAYKK                  | SVMP; <i>P. jerdonii</i> ; PJD c52836_g4                                                                                         |
|      |   |             | 638.3       | 3 | 38    | GMCDPKLSVGLVQDYSK             |                                                                                                                                  |
|      |   |             | 686.9       | 2 | 36    | LAIVVDYGM <sup>+</sup> YTK    |                                                                                                                                  |
|      |   |             | 694.9       | 2 | 36    | LAIVVDYGM <sup>+</sup> YTK    |                                                                                                                                  |
|      |   |             | 428.7       | 2 | 35    | LFSDCSK                       |                                                                                                                                  |
|      |   |             | 466.6       | 3 | 31    | SHDCAHLLTDTK                  |                                                                                                                                  |
|      |   |             | 608.0       | 3 | 28    | LAIVVDYGM <sup>+</sup> YTKYNR |                                                                                                                                  |
|      |   |             | 1006.4      | 2 | 82    | LTPGSQCAEGLCCDQCR             |                                                                                                                                  |
|      |   |             | 666.9       | 3 | 69    | GDYPDDRCTGLSDDCPR             |                                                                                                                                  |
|      |   |             | 466.6       | 3 | 63    | SHDCAHLLTDTK                  |                                                                                                                                  |
| 16.4 |   |             | 604.8       | 2 | 61    | LSVGLVQDYSK                   | SVMP; <i>P. jerdonii</i> ; P0C6E4                                                                                                |
|      |   |             | 590.7       | 2 | 58    | CTGLSDDCPR                    |                                                                                                                                  |
|      |   |             | 1006.4      | 2 | 75    | LTPGSQCAEGLCCDQCR             |                                                                                                                                  |
|      |   |             | 699.3       | 2 | 74    | SHDCAHLLTDTK                  |                                                                                                                                  |
|      |   |             | 666.9       | 3 | 71    | GDYPDDRCTGLSDDCPR             |                                                                                                                                  |
|      |   |             | 625.6       | 3 | 70    | IHNDADSTASISACDGLK            |                                                                                                                                  |
|      |   |             | 604.8       | 2 | 68    | LSVGLVQDYSK                   |                                                                                                                                  |
|      |   |             | 590.7       | 2 | 56    | CTGLSDDCPR                    |                                                                                                                                  |
|      |   |             |             |   |       |                               |                                                                                                                                  |
|      |   |             |             |   |       |                               |                                                                                                                                  |

| Peak | %    | MW<br>(kDa) | Peptide Ion |   | Score | MS/MS-derived sequence | Protein family/species/accession           |
|------|------|-------------|-------------|---|-------|------------------------|--------------------------------------------|
|      |      |             | m/z         | z |       |                        |                                            |
| 35   | 4.33 | 91.1        | 2225.8      | 1 | 121   | LHSWVECESGECCEOCR      | SVMP; <i>P. flavoviridis</i> ; ~A0A077LAC3 |
|      |      |             | 57.9        | 1 | 92    | IYACVNTLNLIYR          | SVMP; <i>Crotalus adamanteus</i> ; ~J3SDW8 |
|      |      |             | 2402.0      | 1 | 76    | LRPGTQCEDGECCEQCQFK    |                                            |
|      |      | 49.1        | 1812.7      | 1 | 130   | QGAQCAEGLCCDQCR        | SVMP; <i>D. acutus</i> ; ~Q1PS45           |
|      |      |             | 2053.9      | 1 | 150   | LKQGAQCAEGLCCDQCR      |                                            |
|      |      |             | 2303.0      | 1 | 27    | SCVMAGTLSCEASYLFSDCSR  |                                            |
|      |      | 25.2        | 1208.7      | 1 | 8     | LSVGLVQDYSK            | SVMP; <i>P. jerdonii</i> ; P0C6E4          |
|      |      |             | 1388.7      | 1 | 5     | LAIVVDYGYMYTK          |                                            |
|      |      | 11.3        | 666.9       | 3 | 59    | GDYPDDRCTGLSDDCPR      | SVMP; <i>P. jerdonii</i> ; P0C6E4          |
|      |      |             | 1006.4      | 2 | 49    | LTPGSQCAEGLCCDQCR      |                                            |
|      | 0.14 | 43.6        | 590.7       | 2 | 44    | CTGLSDDCPR             |                                            |
|      |      |             | 746.7       | 3 | 60    | HQGLPESYNFDFVTMKPVL    | PLB; <i>P. elegans</i> ; ~BAP39922         |
|      |      |             | 453.2       | 2 | 58    | VADISMAAK              |                                            |
|      |      |             | 666.9       | 2 | 57    | VVPESLFAWER            |                                            |
|      |      |             | 469.6       | 3 | 55    | FTAYAINGPPVEK          |                                            |
|      |      |             | 682.6       | 3 | 52    | IANMMADSGKTWAETFEK     |                                            |
|      |      |             | 487.6       | 3 | 47    | KVVPESLFAWER           |                                            |
|      |      |             | 741.4       | 3 | 44    | HQGLPESYNFDFVTMKPVL    |                                            |
|      |      |             | 684.8       | 2 | 44    | DQGKVTDMESMK           |                                            |
|      |      |             | 468.9       | 3 | 44    | YNNYKEDPYAK            |                                            |
|      |      |             | 470.7       | 2 | 41    | VTDMESMK               |                                            |
|      |      |             | 481.6       | 3 | 41    | HLDFKITDPQTK           |                                            |
|      |      |             | 401.7       | 2 | 40    | ITDPQTK                |                                            |
|      |      |             | 682.6       | 3 | 38    | IANMMADSGKTWAETFEK     |                                            |
|      |      | 34.5        | 666.9       | 2 | 63    | VVPESLFAWER            | PLB; <i>P. elegans</i> ; ~BAP39922         |
|      |      |             | 453.2       | 2 | 59    | VADISMAAK              |                                            |
|      |      |             | 450.9       | 3 | 56    | RTPVPAGCYDSK           |                                            |
|      |      |             | 703.9       | 2 | 46    | FTAYAINGPPVEK          |                                            |
|      |      |             | 555.3       | 2 | 46    | YSDQTNILR              |                                            |
| 0.04 | 0.04 | 40.2        | 448.2       | 3 | 68    | HLVIACHYDSK            | QC; <i>P. flavoviridis</i> ; ~BAN89376     |
|      |      |             | 754.8       | 3 | 65    | NTYQIQGIDLFVLLDLIGAR   |                                            |
|      |      |             | 591.0       | 3 | 62    | NLYDLGLLNNYSSER        |                                            |
|      |      |             | 500.9       | 3 | 61    | YPVEDDHIPFLR           |                                            |
|      |      |             | 561.0       | 3 | 60    | MWQNDLHPILIER          |                                            |
|      |      |             | 553.0       | 3 | 54    | RYPVEDDHIPFLR          |                                            |
|      |      |             | 515.0       | 3 | 53    | GVPIHLIPSPFPR          |                                            |
|      |      |             | 513.3       | 3 | 53    | NPVFPVYFLNTAR          |                                            |
|      |      |             | 713.4       | 3 | 52    | VFVGATDSAVPCAMMLELAR   |                                            |

| Peak | %    | MW<br>(kDa) | Peptide Ion |   | Score | MS/MS-derived sequence | Protein family/species/accession                        |
|------|------|-------------|-------------|---|-------|------------------------|---------------------------------------------------------|
|      |      |             | m/z         | z |       |                        |                                                         |
| 36   | 0.23 | 16.4        | 532.8       | 2 | 51    | YFPPQLDGK              | CTL; <i>P. flavoviridis</i> ; ~Q7LZ7                    |
|      |      |             | 627.8       | 2 | 47    | WSPSDSLYGSR            |                                                         |
|      |      |             | 481.6       | 3 | 47    | LIFFDGEEAFVR           |                                                         |
|      |      |             | 705.9       | 2 | 62    | TCLGLEKETGFR           |                                                         |
|      |      |             | 552.0       | 4 | 55    | DCPSGWSSYEGHCYKPFK     |                                                         |
|      | 3.69 | 63.4        | 432.9       | 3 | 47    | LYKTWDDAER             | SVMP; <i>Phalotris mertensi</i> ; ~A0A82C5Q9            |
|      |      |             | 1025.5      | 1 | 51    | FKGAGTECR              |                                                         |
|      |      |             | 1830.0      | 1 | 34    | KYIEFVIVVDNGMFR        |                                                         |
|      |      |             | 694.6       | 3 | 77    | LRQGAQCAEGLCCDQCR      |                                                         |
|      |      |             | 843.3       | 2 | 50    | AATDECDMADLCTGR        |                                                         |
|      |      |             | 851.3       | 2 | 42    | AATDECDMADLCTGR        |                                                         |
|      |      |             | 694.6       | 3 | 59    | LRQGAQCAEGLCCDQCR      |                                                         |
|      |      |             | 25.8        | 1 | 67    | DSDKITVR               |                                                         |
|      |      |             | 1208.6      | 1 | 72    | LSVGLVQDYSK            |                                                         |
|      |      |             | 1397.6      | 1 | 56    | SHDCAHLLTDTK           |                                                         |
|      | 0.09 | 56.1        | 711.0       | 3 | 71    | RFDEIVGGMDQLPTSMYR     | LAAO; <i>P. elegans</i> ; ~BAP3995                      |
|      |      |             | 618.8       | 2 | 68    | SAGQLFEESLR            |                                                         |
|      |      |             | 711.0       | 3 | 60    | RFDEIVGGMDQLPTSMYR     |                                                         |
|      |      |             | 705.7       | 3 | 58    | RFDEIVGGMDQLPTSMYR     |                                                         |
|      |      |             | 682.9       | 2 | 53    | SAGQLFEESLRK           |                                                         |
|      |      |             | 490.3       | 2 | 48    | EYLIKEGK               |                                                         |
|      |      |             | 588.6       | 4 | 46    | YPVKPSEEGKSAGQLFEESLR  |                                                         |
|      |      |             | 716.3       | 3 | 45    | RFDEIVGGMDQLPTSMYR     |                                                         |
|      |      |             | 749.8       | 2 | 60    | VVGGDCECNINEHR         |                                                         |
|      |      |             | 993.5       | 1 | 48    | SYVWIGLR               |                                                         |
| 37   | 0.06 | 34.5        | 1410.7      | 1 | 86    | TCLGLEKETGFR           | SVSP; <i>Agkistrodon contortrix contortrix</i> ; ~P8298 |
|      | 0.41 | 16.4        | 905.4       | 1 | 15    | STNNKWR                | CTL; <i>P. flavoviridis</i> ; ~Q7LZ7                    |
|      | 0.31 | 11.0        | -           | - | -     | -                      | CTL; <i>P. flavoviridis</i> ; ~T2HP57                   |
|      |      | 110.5       | -           | - | -     | -                      | Unknown                                                 |
|      | 0.90 | 63.4        | -           | - | -     | -                      | Unknown                                                 |
|      |      | 73.1        | 742.6       | 3 | 66    | LHSWVECESGECCEQCR      | SVMP; <i>P. mucrosquamatus</i> ; ~XP_05683679           |
|      |      | 51.5        | 843.3       | 2 | 57    | AATDECDMADLCTGR        | SVMP; <i>P. flavoviridis</i> ; ~Q90ZI3                  |
|      |      | 26.3        | 567.9       | 3 | 42    | AATDECDMADLCTGR        | SVMP; <i>P. jerdonii</i> ; P0C6E4                       |
|      |      |             | 602.6       | 3 | 58    | LAIVVDYGYMYTKYNR       |                                                         |
|      |      |             | 466.6       | 3 | 55    | SHDCAHLLTDTK           |                                                         |
|      |      |             | 604.8       | 2 | 46    | LSVGLVQDYSK            |                                                         |
|      |      | 11.0        | 608.0       | 3 | 44    | LAIVVDYGYMYTKYNR       | SVMP; <i>P. jerdonii</i> ; P0C6E4                       |
|      |      |             | 1006.4      | 2 | 57    | LTPGSQCAEGLCCDQCR      |                                                         |
|      |      |             | 604.8       | 2 | 51    | LSVGLVQDYSK            |                                                         |



| Peak | %    | MW<br>(kDa) | Peptide Ion |   | Score | MS/MS-derived sequence       | Protein family/species/accession          |
|------|------|-------------|-------------|---|-------|------------------------------|-------------------------------------------|
|      |      |             | m/z         | z |       |                              |                                           |
| 38   | 0.21 | 36.0        | 2879.4      | 1 | 86    | LDSSVSNSEHIAPLSLPSSPPSVGSVCR | SVSP; <i>T. stejnegeri</i> ; ~Q91516      |
|      |      |             | 3046.5      | 1 | 26    | TIPTKEIYPDVPHCANINILDHAVCR   |                                           |
|      | 0.35 | 16.7        | 993.6       | 1 | 35    | SYVWIGLR                     | CTL; <i>P. flavoviridis</i> ; ~Q7LZ7      |
|      |      |             | 2204.9      | 1 | 66    | DCPSGWSSYEGHCYKPFK           |                                           |
|      | 1.91 | 49.1        | 1174.6      | 1 | 38    | IFPCAPQDVK                   | SVMP; <i>P. flavoviridis</i> ; ~G1UJB2    |
|      |      |             | 1472.8      | 1 | 84    | YLISHTPQCILK                 |                                           |
|      |      |             | 1968.0      | 1 | 114   | YLISHTPQCILKEPLR             |                                           |
|      |      | 26.3        | 933.5       | 1 | 55    | DSDKITVR                     | SVMP; <i>P. jerdonii</i> ; P0C6E4         |
|      |      |             | 1208.6      | 1 | 70    | LSVGLVQDYSK                  |                                           |
|      | 0.02 | 35.2        | 968.5       | 1 | 18    | FFCPNRK                      | SVSP; <i>T. stejnegeri</i> ; ~Q91516      |
|      |      |             | 1097.5      | 1 | 26    | EKFFCPNR                     |                                           |
|      |      |             | 2879.4      | 1 | 96    | LDSSVSNSEHIAPLSLPSSPPSVGSVCR |                                           |
|      | 0.51 | 16.7        | 993.5       | 1 | 51    | SYVWIGLR                     | CTL; <i>P. flavoviridis</i> ; ~Q7LZ7      |
|      |      |             | 1410.7      | 1 | 88    | TCLGLEKETGFR                 |                                           |
|      |      |             | 2204.9      | 1 | 92    | DCPSGWSSYEGHCYKPFK           |                                           |
|      |      | 11.3        | 1843.8      | 1 | 47    | YKAWAEESYCVYFK               | CTL; <i>P. flavoviridis</i> ; ~A0A077LD73 |

Methionine oxidation is underlined.

Supplementary table 3 Assignment of the reverse-phase chromatographic fractions from *Protobothrops mangshanensis* venom to protein families by nESI-MS/MS of selected peptide ions from in-gel digested protein bands separated by SDS-PAGE.

| Peak | %    | MW<br>(kDa) | Peptide Ion |   | Score | MS/MS-derived sequence    | Protein family/species/accession                               |
|------|------|-------------|-------------|---|-------|---------------------------|----------------------------------------------------------------|
|      |      |             | m/z         | z |       |                           |                                                                |
| 1    | 0.88 | -           | 679.4       | 2 | 42    | PPISPLSVQHWP              | BPP/CNP; <i>Protobothrops jerdonii</i> ; ~PJD c31701           |
| 2    | 1.82 | -           | 622.3       | 2 | 71    | QSKPGRPPPISP              | BPP/CNP; <i>P. jerdonii</i> ; ~PJD c31701                      |
| 3    | 0.56 | -           | 719.8       | 2 | 107   | QPHEPAGGTTAFR             | BPP/CNP; <i>P. jerdonii</i> ; ~PJD c31701                      |
| 4    | 0.42 | 88.3        | 622.3       | 2 | 101   | QSKPGRPPPISP              | SVMP; <i>Protobothrops elegans</i> ; ~BAP39935                 |
|      |      |             | 530.3       | 2 | 43    | QSKPGRPPPI                |                                                                |
|      |      |             | 587.8       | 2 | 31    | MIPCAPQDVK                |                                                                |
|      |      |             | 502.7       | 2 | 51    | GNDYGYCR                  |                                                                |
|      |      |             | 587.8       | 2 | 45    | MIPCAPQDVK                |                                                                |
|      |      |             | 579.8       | 2 | 38    | MIPCAPQDVK                |                                                                |
|      | 0.04 | 80.5        | -           | - | -     | -                         | Unknown                                                        |
|      |      | 74.7        | -           | - | -     | -                         | Unknown                                                        |
| 5    | 0.06 | 27.8        | 906.8       | 2 | 79    | QGAQCAEGLCCDQCR           | Disintegrin; <i>Protobothrops flavoviridis</i> ; ~Q90ZI3       |
|      |      |             | 529.8       | 2 | 43    | IACEPQNVK                 |                                                                |
| 6    | 0.17 | 5.8         | -           | - | -     | -                         | Unknown                                                        |
| 7    | 0.09 | 3.4         | -           | - | -     | -                         | Unknown                                                        |
| 8    | 0.11 | -           | -           | - | -     | -                         | Unknown                                                        |
| 9    | 0.08 | 17.7        | 682.3       | 2 | 68    | ALTMEGNQASWR              | NGF; <i>P. flavoviridis</i> ; ~BAN82015                        |
| 10   | 0.06 | 18.5        | 647.3       | 2 | 63    | IDTACVCVISR               | NGF; <i>P. flavoviridis</i> ; ~BAN82015                        |
|      |      |             | 855.4       | 2 | 53    | FIRIDTACVCVISR            |                                                                |
|      |      |             | 556.3       | 2 | 44    | NPNPVPTGCR                |                                                                |
|      |      |             | 570.6       | 3 | 61    | FIRIDTACVCVISR            |                                                                |
|      |      |             | 647.3       | 2 | 59    | IDTACVCVISR               |                                                                |
|      |      |             | 556.3       | 2 | 40    | NPNPVPTGCR                |                                                                |
| 11   | 0.39 | 14.9        | 633.9       | 5 | 47    | ETLVPIKEYPDEVSHLFKPCVPVLR | VEGF; <i>P. flavoviridis</i> ; ~P67862                         |
|      | 0.77 | 16.5        | 622.3       | 2 | 46    | NLGTVDKNYR                | PLA <sub>2</sub> ; <i>Protobothrops mangshanensis</i> ; P84776 |
|      |      |             | 449.9       | 3 | 40    | DRYSYSWENK                |                                                                |
|      |      |             | 579.6       | 3 | 37    | ELCECDKAVAICLR            |                                                                |
|      |      |             | 401.7       | 2 | 34    | AVAICLR                   |                                                                |
|      |      |             | 463.6       | 3 | 31    | AIVCGEKNPCLK              |                                                                |
|      |      |             | 470.2       | 2 | 30    | MVFQETGK                  |                                                                |
|      |      |             | 583.3       | 2 | 41    | NVDFDSESPR                |                                                                |
| 12   | 8.24 | 49.3        | 636.3       | 2 | 36    | CPASCFCQNK                | CRISP; <i>P. flavoviridis</i> ; ~1WVR_A                        |
|      |      |             | 743.8       | 2 | 51    | SKCPASCFCQNK              | CRISP; <i>P. flavoviridis</i> ; ~6IMF_A                        |
|      |      |             | 636.3       | 2 | 49    | CPASCFCQNK                |                                                                |
|      |      |             | 499.9       | 3 | 38    | CPASCFCQNK                |                                                                |

| Peak | %    | MW<br>(kDa) | Peptide Ion |   | Score | MS/MS-derived sequence   | Protein family/species/accession                         |
|------|------|-------------|-------------|---|-------|--------------------------|----------------------------------------------------------|
|      |      |             | m/z         | z |       |                          |                                                          |
| 13   | 0.49 | 22.3        | 512.3       | 4 | 38    | WTDIIHAWHGEYKDFK         | CRISP; <i>P. flavoviridis</i> ; ~Q8JI39                  |
|      |      |             | 777.3       | 2 | 94    | MEWYPEAAANAER            |                                                          |
|      |      |             | 581.3       | 2 | 63    | SVNPTASNMLK              |                                                          |
|      |      |             | 904.8       | 3 | 52    | SVNPTASNMLKMEWYPEAAANAER |                                                          |
|      |      | 20.0        | 583.3       | 2 | 56    | NVDFDSESPR               | CRISP; <i>P. flavoviridis</i> ; ~6IMF_A                  |
|      |      | 23.8        | -           | - | -     | -                        | Unknown                                                  |
|      |      | 0.46        | 581.6       | 3 | 71    | EICECDKAAAICFR           | PLA2; <i>P. mangshanensis</i> ; AHJ09547                 |
|      |      |             | 704.3       | 2 | 65    | DIVCGEDNPCTK             |                                                          |
|      |      |             | 730.7       | 3 | 52    | VTGCNPKDDFYIYSLQNR       |                                                          |
|      |      |             | 717.3       | 2 | 35    | DDFYIYSLQNR              |                                                          |
|      |      |             | 717.3       | 2 | 63    | DDFYIYSLQNR              |                                                          |
|      |      |             | 716.0       | 3 | 93    | SAHIAPLSLPSNPPSVGSVCR    |                                                          |
|      | 2.27 | 43.1        | 569.3       | 4 | 62    | KSAHIAPLSLPSNPPSVGSVCR   | SVSP; <i>Agkistrodon piscivorus conanti</i> ; ~JAS04401  |
|      |      |             | 594.8       | 2 | 26    | WNKDIMLR                 |                                                          |
|      |      |             | 536.9       | 3 | 49    | TLCAGILEGGKDSCK          |                                                          |
|      |      |             | 763.9       | 2 | 62    | IIGGDECNINEHR            |                                                          |
|      |      |             | 583.8       | 2 | 52    | VMGWGTISATK              |                                                          |
|      |      |             | 565.3       | 2 | 38    | ILCAGILQGGK              |                                                          |
|      |      |             | 647.3       | 2 | 56    | IDTACVCVISR              |                                                          |
|      |      |             | 565.3       | 2 | 50    | ILCAGILQGGK              |                                                          |
|      |      |             | 756.8       | 2 | 45    | VIGGDECNINEHR            |                                                          |
|      |      |             | 559.8       | 2 | 63    | TLCAGILEGGK              |                                                          |
| 14   | 0.08 | 0.20        | 575.8       | 2 | 45    | VMGWGTISATK              | SVSP; <i>P. jerdonii</i> ; ~B0ZT25                       |
|      |      |             | 565.3       | 2 | 39    | ILCAGILQGGK              |                                                          |
|      |      |             | 411.2       | 3 | 49    | KVLNEDEQTR               |                                                          |
|      |      |             | 552.3       | 2 | 46    | VLNEDEQTR                |                                                          |
|      |      |             | 550.8       | 2 | 45    | NVPNEDEQR                |                                                          |
|      |      |             | 419.5       | 3 | 44    | NVPNEDEQRR               |                                                          |
|      |      |             | 473.3       | 2 | 37    | EWVLTAAR                 |                                                          |
|      |      |             | 473.3       | 2 | 41    | EWVLTAAR                 |                                                          |
|      |      |             | 411.2       | 3 | 55    | KVLNEDEQTR               |                                                          |
|      |      |             | 552.3       | 2 | 48    | VLNEDEQTR                |                                                          |
| 15   | 1.20 | 1.20        | 411.2       | 3 | 46    | KVLNEDEQTR               | SVSP; <i>P. jerdonii</i> ; ~Q9DF66                       |
|      |      |             | 552.3       | 2 | 44    | VLNEDEQTR                |                                                          |
|      |      |             | 504.9       | 3 | 41    | VIGGDECNINEHR            |                                                          |
|      |      |             | 763.9       | 2 | 59    | IIGGDECNINEHR            |                                                          |
|      |      |             | 444.9       | 3 | 47    | SKTLCAGILQGGK            |                                                          |
|      |      |             | 582.8       | 2 | 31    | IMGWGTISATK              |                                                          |
|      |      |             | 504.9       | 3 | 41    | VIGGDECNINEHR            |                                                          |
|      |      |             | 763.9       | 2 | 59    | IIGGDECNINEHR            |                                                          |
|      |      |             | 444.9       | 3 | 47    | SKTLCAGILQGGK            |                                                          |
|      |      |             | 582.8       | 2 | 31    | IMGWGTISATK              |                                                          |
| 16   | 2.48 | 2.48        | 504.9       | 3 | 41    | VIGGDECNINEHR            | SVSP; <i>Agkistrodon contortrix contortrix</i> ; ~2AIQ_A |
|      |      |             | 763.9       | 2 | 59    | IIGGDECNINEHR            |                                                          |
|      |      |             | 444.9       | 3 | 47    | SKTLCAGILQGGK            |                                                          |
|      |      |             | 582.8       | 2 | 31    | IMGWGTISATK              |                                                          |
|      |      |             | 504.9       | 3 | 41    | VIGGDECNINEHR            |                                                          |
|      |      |             | 763.9       | 2 | 59    | IIGGDECNINEHR            |                                                          |
|      |      |             | 444.9       | 3 | 47    | SKTLCAGILQGGK            |                                                          |
|      |      |             | 582.8       | 2 | 31    | IMGWGTISATK              |                                                          |
|      |      |             | 504.9       | 3 | 41    | VIGGDECNINEHR            |                                                          |
|      |      |             | 763.9       | 2 | 59    | IIGGDECNINEHR            |                                                          |

| Peak | %    | MW<br>(kDa) | Peptide Ion |   | Score | MS/MS-derived sequence | Protein family/species/accession                           |
|------|------|-------------|-------------|---|-------|------------------------|------------------------------------------------------------|
|      |      |             | m/z         | z |       |                        |                                                            |
| 17   | 1.30 | 27.8        | 559.3       | 2 | 41    | TLCAGILQGGK            | SVSP; <i>P. jerdonii</i> ; ~AAG10790                       |
|      |      |             | 552.3       | 2 | 33    | VLNEDEQTR              |                                                            |
|      |      | 20.3        | 559.3       | 2 | 52    | TLCAGILQGGK            | SVSP; <i>P. jerdonii</i> ; ~AAG10790                       |
|      |      |             | 552.3       | 2 | 48    | VLNEDEQTR              |                                                            |
|      |      |             | 411.2       | 3 | 42    | KVLNEDEQTR             |                                                            |
|      |      | 19.2        | 552.3       | 2 | 47    | VLNEDEQTR              | SVSP; <i>P. jerdonii</i> ; ~AAG10790                       |
|      |      |             | 411.2       | 3 | 44    | KVLNEDEQTR             |                                                            |
|      |      |             | 559.3       | 2 | 42    | TLCAGILQGGK            |                                                            |
|      |      | 16.5        | 552.3       | 2 | 50    | VLNEDEQTR              | SVSP; <i>P. jerdonii</i> ; ~Q9DF66                         |
|      |      |             | 411.2       | 3 | 47    | KVLNEDEQTR             |                                                            |
|      |      | 15.0        | 411.2       | 3 | 54    | KVLNEDEQTR             | SVSP; <i>P. jerdonii</i> ; ~Q9DF66                         |
|      |      |             | 552.3       | 2 | 49    | VLNEDEQTR              |                                                            |
|      |      | 50.3        | 504.9       | 3 | 47    | VIGGDECNINEHR          | SVSP; <i>Gloydius blomhoffii</i> ; ~CAB65936               |
|      | 3.28 | 45.4        | 590.8       | 2 | 49    | IMGWGTISATK            | SVSP; <i>P. flavoviridis</i> ; ~BAP39955                   |
|      |      | 33.5        | 588.3       | 2 | 50    | AAYPELPATSR            | SVSP; <i>P. mucrosquamatus</i> ; ~XP_015671560             |
|      |      |             | 448.8       | 2 | 40    | VTLPDVPR               |                                                            |
|      |      |             | 820.4       | 2 | 35    | CANINLLDYEVC           |                                                            |
|      |      | 17.4        | 528.3       | 4 | 60    | FCSEQVKGAHLVSIESYR     | CTL; <i>P. mucrosquamatus</i> ; ~XP_015685588              |
|      |      | 14.8        | 914.9       | 2 | 47    | TTDNQWLSMDCSSKR        | CTL; <i>P. mucrosquamatus</i> ; ~Q5FZI5                    |
|      |      |             | 922.9       | 2 | 38    | TTDNQWLSMDCSSKR        |                                                            |
|      | 4.24 | 107.4       | 442.2       | 3 | 58    | CIELVIVADHR            | SVMP; <i>Ovophis okinavensis</i> ; ~BAN82161               |
|      |      | 44.1        | 1005.4      | 2 | 69    | GDWNDDRCTGQSADCPR      | SVMP; <i>P. mucrosquamatus</i> ; ~E9NW26                   |
|      |      |             | 576.2       | 2 | 58    | CTGQSADCPR             |                                                            |
|      | 0.98 | 85.1        | -           | - | -     | -                      | Unknown                                                    |
|      |      | 18.2        | -           | - | -     | -                      | Unknown                                                    |
|      | 2.74 | 56.8        | 754.1       | 3 | 50    | NSAHIAPLSLPSNPPSVGSVCR | SVSP; <i>Gloydius brevicaudus</i> ; ~AAF25008              |
|      |      | 49.3        | 559.8       | 2 | 55    | TLCAGILEGGK            | SVSP; <i>G. blomhoffii</i> ; ~CAB65936                     |
|      |      |             | 504.9       | 3 | 47    | VIGGDECNINEHR          |                                                            |
|      |      | 35.2        | 570.8       | 2 | 55    | AAKPELPATSR            | SVSP; <i>Crotalus adamanteus</i> ; ~J3SDW9                 |
|      |      | 33.5        | 588.3       | 2 | 42    | AAYPELPATSR            | SVSP; <i>P. mucrosquamatus</i> ; ~Q91508                   |
|      |      | 29.5        | 559.8       | 2 | 49    | TLCAGILEGGK            | SVSP; <i>Protobothrops elegans</i> ; ~P84787               |
|      |      | 25.2        | 559.8       | 2 | 58    | TLCAGILEGGK            | SVSP; <i>P. mucrosquamatus</i> ; ~XP_015671557             |
|      |      | 23.5        | 559.8       | 2 | 56    | TLCAGILEGGK            | SVSP; <i>P. mucrosquamatus</i> ; ~XP_015671557             |
|      |      | 22.4        | 559.8       | 2 | 73    | TLCAGILEGGK            | SVSP; <i>P. mucrosquamatus</i> ; ~XP_015671557             |
|      | 0.98 | 16.1        | 808.4       | 2 | 42    | YNAWSAESECIASK         | CTL; <i>P. jerdonii</i> ; ~D1MGU1                          |
|      |      |             | 588.8       | 2 | 40    | LQWSDGTELK             |                                                            |
| 19   | 0.71 | 56.8        | 754.1       | 3 | 48    | NSAHIAPLSLPSNPPSVGSVCR | SVSP; <i>Agkistrodon piscivorus leucostoma</i> ; ~ADP88562 |

| Peak | %     | MW<br>(kDa) | Peptide Ion |          | Score | MS/MS-derived sequence | Protein family/species/accession                 |                                                      |
|------|-------|-------------|-------------|----------|-------|------------------------|--------------------------------------------------|------------------------------------------------------|
|      |       |             | m/z         | z        |       |                        |                                                  |                                                      |
| 20   | 0.48  | 49.3        | 562.3       | 2        | 48    | SVQFDDEQR              | SVSP; <i>Trimeresurus stejnegeri</i> ; ~AAN52347 |                                                      |
|      |       | 43.7        | 562.3       | 2        | 27    | SVQFDDEQR              | SVSP; <i>Ovophis okinavensis</i> ; ~BAN82129     |                                                      |
|      |       | 18.2        | -           | -        | -     | -                      | Unknown                                          |                                                      |
|      |       | 0.40        | 16.0        | 797.9    | 2     | 46                     | LASIQSSEEEAFVGK                                  | CTL; <i>P. flavoviridis</i> ; ~BAP39991              |
|      |       | 0.12        | 44.3        | 626.8    | 2     | 55                     | SAGQLYEESLR                                      | LAAO; <i>P. flavoviridis</i> ; ~BAN82013             |
|      | 1.82  |             |             | 438.7    | 2     | 47                     | STTDLPSR                                         |                                                      |
|      |       | 33.5        | 626.8       | 2        | 44    | SAGQLYEESLR            | LAAO; <i>P. flavoviridis</i> ; ~BAN82013         |                                                      |
|      |       |             | 412.6       | 3        | 36    | KVTVTYQTPAK            |                                                  |                                                      |
|      |       |             | 438.7       | 2        | 35    | STTDLPSR               |                                                  |                                                      |
|      |       | 31.6        | 626.8       | 2        | 46    | SAGQLYEESLR            | LAAO; <i>P. flavoviridis</i> ; ~BAN82013         |                                                      |
|      |       |             | 438.7       | 2        | 38    | STTDLPSR               |                                                  |                                                      |
|      |       |             | 18.5        | 411.2    | 3     | 51                     | GAHLVSIESYR                                      | CTL; <i>Trimeresurus purpureomaculatus</i> ; ~P0DJL2 |
|      |       |             | 481.9       | 3        | 31    | YHVGWGLSVQNK           |                                                  |                                                      |
|      |       | 15.6        | 420.7       | 2        | 31    | TVSFCVK                | CTL; <i>P. jerdonii</i> ; ~PJD c42983            |                                                      |
|      |       |             | 797.9       | 2        | 28    | LASIQSSEEEAFVGK        |                                                  |                                                      |
|      | 532.7 | 2           | 24          | WEWSDDAR |       |                        |                                                  |                                                      |
| 21   | 2.36  | 18.2        | 616.3       | 2        | 66    | GAHLVSIESYR            | CTL; <i>P. mucrosquamatus</i> ; ~XP_015685588    |                                                      |
|      |       |             | 449.2       | 2        | 18    | FCSEQVK                |                                                  |                                                      |
|      |       | 15.7        | 584.3       | 2        | 37    | EQFECLVSR              | CTL; <i>Trimeresurus albolabris</i> ; ~P81114    |                                                      |
|      |       |             | 959.9       | 2        | 34    | DCPSDWSSYEGHCYR        |                                                  |                                                      |
| 22   | 5.38  | 17.4        | 411.2       | 3        | 66    | GAHLVSIESYR            | CTL; <i>Protobothrops elegans</i> ; ~BAP39929    |                                                      |
|      |       | 15.5        | 616.3       | 2        | 52    | GAHLVSIESYR            | CTL; <i>P. elegans</i> ; ~BAP39929               |                                                      |
| 23   | 0.72  | 103.3       | -           | -        | -     | -                      | Unknown                                          |                                                      |
|      | 0.16  | 66.2        | 782.4       | 2        | 65    | CSSITELEKVNQR          | PDE; <i>P. elegans</i> ; ~BAP39928               |                                                      |
|      |       |             | 561.3       | 2        | 58    | NPFYTPSPAK             |                                                  |                                                      |
|      |       |             | 787.9       | 2        | 51    | STPTSVPPSASDCLR        |                                                  |                                                      |
|      |       | 57.4        | 782.4       | 2        | 68    | CSSITELEKVNQR          | PDE; <i>P. flavoviridis</i> ; ~BAN82021          |                                                      |
|      |       |             | 787.9       | 2        | 59    | STPTSVPPSASDCLR        |                                                  |                                                      |
|      |       |             | 561.3       | 2        | 49    | NPFYTPSPAK             |                                                  |                                                      |
|      |       |             | 530.8       | 2        | 41    | SVQPQVSCR              |                                                  |                                                      |
|      |       | 43.8        | 782.4       | 2        | 53    | CSSITELEKVNQR          | PDE; <i>P. flavoviridis</i> ; ~BAN82021          |                                                      |
|      |       |             | 787.9       | 2        | 49    | STPTSVPPSASDCLR        |                                                  |                                                      |
|      |       |             | 403.2       | 2        | 41    | ALEMADR                |                                                  |                                                      |
|      |       |             | 457.8       | 2        | 39    | LNLNNQAK               |                                                  |                                                      |
|      |       |             | 419.8       | 2        | 38    | IQIHTAR                |                                                  |                                                      |
|      |       | 4.50        | 17.1        | 483.8    | 2     | 37                     | LVSIESYR                                         | CTL; <i>P. jerdonii</i> ; ~D1MGU0                    |
|      |       |             | 15.0        | 959.9    | 2     | 80                     | DCPSDWSSYEGHCYR                                  | CTL; <i>T. albolabris</i> ; ~P81114                  |
|      |       |             |             | 774.4    | 2     | 56                     | VFNEPQNWADA EK                                   |                                                      |

| Peak | %    | MW<br>(kDa) | Peptide Ion |   | Score | MS/MS-derived sequence | Protein family/species/accession            |
|------|------|-------------|-------------|---|-------|------------------------|---------------------------------------------|
|      |      |             | m/z         | z |       |                        |                                             |
| 24   | 0.12 | 103.3       | 826.4       | 3 | 53    | VFNEPQNWADA EK FCTQQHK | PDE; <i>P. mucrosquamatus</i> ; ~PMR c20258 |
|      |      |             | 787.9       | 2 | 35    | STPTSVPPSASDCLR        |                                             |
|      |      |             | 561.3       | 2 | 33    | NPFYTPSPAK             |                                             |
|      | 4.27 | 16.9        | 457.8       | 2 | 25    | LNLNNQAK               | CTL; <i>P. elegans</i> ; ~BAP39929          |
|      |      |             | 411.2       | 3 | 70    | GAHLVSIESYR            |                                             |
|      |      |             | 501.6       | 3 | 42    | QYCYKPFKQLK            |                                             |
|      |      | 15.0        | 567.3       | 2 | 35    | QYCYKPFK               | CTL; <i>T. albolabris</i> ; ~P81114         |
|      |      |             | 826.4       | 3 | 69    | VFNEPQNWADA EK FCTQQHK |                                             |
|      |      |             | 640.2       | 3 | 69    | DCPSDWSSYEGHCYR        |                                             |
| 25   | 0.04 | 99.4        | 584.3       | 2 | 52    | EQFECLVSR              | PDE; <i>P. elegans</i> ; ~BAP39928          |
|      |      |             | 746.8       | 2 | 51    | SVQPQAQSWSCSK          |                                             |
|      |      |             | 532.3       | 2 | 47    | GETSWLKDK              |                                             |
|      |      |             | 410.2       | 2 | 38    | SIPFEAR                |                                             |
|      | 0.33 | 58.6        | 403.2       | 2 | 36    | ALEMADR                | SVMP; <i>P. flavoviridis</i> ; ~Q90ZI3      |
|      |      |             | 811.0       | 3 | 34    | AAGTECRAATDECDMADLCTGR |                                             |
|      |      |             | 656.4       | 2 | 34    | IIVQSVDPVTLK           |                                             |
|      |      |             | 423.9       | 3 | 41    | SAECTDRFQR             |                                             |
|      |      | 44.1        | 502.3       | 2 | 37    | NMPQCILK               | SVMP; <i>P. flavoviridis</i> ; ~Q90ZI3      |
|      |      |             | 906.8       | 2 | 70    | QGAQCAEGLCCDQCR        |                                             |
|      |      |             | 694.6       | 3 | 62    | LRQGAQCAEGLCCDQCR      |                                             |
|      |      |             | 477.9       | 3 | 45    | IACEPQNVKCGR           |                                             |
|      | 3.84 | 16.9        | 409.7       | 2 | 39    | GMVLPGTK               | CTL; <i>T. albolabris</i> ; ~P81114         |
|      |      |             | 502.3       | 2 | 39    | NMPQCILK               |                                             |
|      |      |             | 640.2       | 3 | 57    | DCPSDWSSYEGHCYR        |                                             |
|      |      |             | 620.0       | 4 | 41    | VFNEPQNWADA EK FCTQQHK |                                             |
|      |      |             | 584.3       | 2 | 40    | EQFECLVSR              |                                             |
|      |      |             | 774.4       | 2 | 37    | VFNEPQNWADA EK         |                                             |
|      |      | 15.2        | 959.9       | 2 | 83    | DCPSDWSSYEGHCYR        | CTL; <i>T. albolabris</i> ; ~P81114         |
|      |      |             | 1239.1      | 2 | 66    | VFNEPQNWADA EK FCTQQHK |                                             |
|      |      |             | 774.4       | 2 | 53    | VFNEPQNWADA EK         |                                             |
| 26   | 0.03 | 103.3       | 561.3       | 2 | 54    | NPFYTPSPAK             | PDE; <i>P. flavoviridis</i> ; ~BAN82023     |
|      |      |             | 782.4       | 2 | 46    | CSSITELEKVNQR          |                                             |
|      |      |             | 694.6       | 3 | 74    | LRQGAQCAEGLCCDQCR      |                                             |
|      | 0.12 | 58.6        | 906.8       | 2 | 58    | QGAQCAEGLCCDQCR        | SVMP; <i>P. flavoviridis</i> ; ~Q90ZI3      |
|      |      |             | 502.3       | 2 | 39    | NMPQCILK               |                                             |
|      |      |             | 423.9       | 3 | 36    | SAECTDRFQR             |                                             |
|      |      |             | 656.4       | 2 | 31    | IIVQSVDPVTLK           |                                             |
|      |      |             | 666.9       | 2 | 69    | VVPESLFAWER            |                                             |
|      | 0.10 | 43.7        |             |   |       |                        | PLB; <i>P. flavoviridis</i> ; ~BAN82026     |

| Peak | %    | MW<br>(kDa) | Peptide Ion |   | Score | MS/MS-derived sequence | Protein family/species/accession                                               |
|------|------|-------------|-------------|---|-------|------------------------|--------------------------------------------------------------------------------|
|      |      |             | m/z         | z |       |                        |                                                                                |
| 27   | 0.05 | 31.7        | 479.6       | 3 | 51    | HGLEFSYEMAPR           | LAAO; <i>P. flavoviridis</i> ; ~BAP39950                                       |
|      |      |             | 453.2       | 2 | 40    | VADISMAAK              |                                                                                |
|      |      |             | 597.8       | 2 | 37    | TPVPAGCYDSK            |                                                                                |
|      |      |             | 438.7       | 2 | 54    | STTDLPSPR              |                                                                                |
|      |      |             | 626.8       | 2 | 49    | SAGQLYEESLR            |                                                                                |
|      | 2.01 | 16..5       | 29.9        | 2 | 73    | SAGQLYEESLR            | LAAO; <i>P. flavoviridis</i> ; ~BAN82014<br>CTL; <i>P. elegans</i> ; ~BAP39929 |
|      |      |             | 411.2       | 3 | 76    | GAHLVSIESYR            |                                                                                |
|      |      |             | 567.3       | 2 | 39    | QYCYKPFK               |                                                                                |
|      |      |             | 14.7        | 2 | 49    | TTDNQWLSMDCSSKR        |                                                                                |
|      |      |             | 922.9       | 2 | 31    | TTDNQWLSMDCSSKR        |                                                                                |
|      | 3.86 | 67.5        | 906.8       | 2 | 81    | QGAQCAEGLCCDQCR        | SVMP; <i>T. stejnegeri</i> ; ~ABC73079                                         |
|      |      |             | 694.6       | 3 | 67    | LRQGAQCAEGLCCDQCR      |                                                                                |
|      |      |             | 801.0       | 3 | 55    | GAGTECRPASSECDMADLCTGR |                                                                                |
|      |      |             | 502.3       | 2 | 47    | NMPQCILK               |                                                                                |
|      |      |             | 423.9       | 3 | 47    | SAECTDRFQR             |                                                                                |
|      |      |             | 59.2        | 3 | 47    | IACEPQNVKCGR           |                                                                                |
|      |      |             | 529.8       | 2 | 43    | IACEPQNVK              |                                                                                |
|      |      |             | 40.8        | 3 | 60    | IACEPQNVKCGR           |                                                                                |
|      |      |             | 44.4        | 3 | 56    | YNNYKEDPYAK            |                                                                                |
|      |      |             | 597.8       | 2 | 42    | TPVPAGCYDSK            |                                                                                |
|      |      |             | 453.2       | 2 | 38    | VADISMAAK              |                                                                                |
|      |      |             | 450.9       | 3 | 33    | RTPVPAGCYDSK           |                                                                                |
|      | 1.92 | 16.5        | -           | - | -     | -                      | Unknown                                                                        |
|      | 2.78 | 14.7        | 584.3       | 2 | 52    | EQFECLVSR              | CTL; <i>T. albolabris</i> ; ~P81114                                            |
|      |      |             | 640.2       | 3 | 60    | DCPSDWSSYEGHCYR        |                                                                                |
| 28   | 7.98 | 90.2        | 423.9       | 3 | 31    | SAECTDRFQR             | SVMP; <i>P. jerdonii</i> ; ~PJD c52836                                         |
|      |      |             | 579.8       | 2 | 30    | MIPCAPQDVK             |                                                                                |
|      |      |             | 587.8       | 2 | 30    | MIPCAPQDVK             |                                                                                |
|      |      |             | 80.3        | 3 | 46    | SAECTDRFQR             |                                                                                |
|      |      |             | 59.2        | 2 | 79    | QGAQCAEGLCCDQCR        |                                                                                |
|      |      |             | 477.9       | 3 | 76    | IACEPQNVKCGR           |                                                                                |
|      |      |             | 423.9       | 3 | 44    | SAECTDRFQR             |                                                                                |
|      |      |             | 16.7        | 2 | 37    | QCVDVNRAY              |                                                                                |
|      | 4.75 | 14.8        | -           | - | -     | -                      | Unknown                                                                        |
|      | 0.94 | 72.9        | 634.8       | 2 | 36    | DESIGMVDVTGTK          | SVMP; <i>P. mucrosquamatus</i> ; ~XP_015683679                                 |
| 29   | 6.17 | 17.6        | -           | - | -     | -                      | Unknown                                                                        |
|      |      |             | -           | - | -     | -                      | Unknown                                                                        |
|      |      |             | -           | - | -     | -                      | Unknown                                                                        |
| 30   | 0.43 | 77.2        | 626.8       | 2 | 40    | DESIGMVDVTGTK          | SVMP; <i>P. mucrosquamatus</i> ; ~XP_015683679                                 |

| Peak | %    | MW<br>(kDa) | Peptide Ion |   | Score | MS/MS-derived sequence | Protein family/species/accession                                                        |
|------|------|-------------|-------------|---|-------|------------------------|-----------------------------------------------------------------------------------------|
|      |      |             | m/z         | z |       |                        |                                                                                         |
| 31   | 1.72 | 17.4        | 514.3       | 2 | 39    | IPCAPQDVK              | CTL; <i>P. flavoviridis</i> ; ~BAN81993                                                 |
|      |      |             | 634.8       | 2 | 36    | DESIG <u>M</u> VDTGTK  |                                                                                         |
|      |      |             | 410.7       | 2 | 29    | TCLGLEK                |                                                                                         |
|      | 1.98 | 50.3        | 584.3       | 2 | 55    | EQFECLVSR              | CTL; <i>T. albolabris</i> ; ~3023232<br>SVMP; <i>Sistrurus tergeminus</i> ; ~JAS05270   |
|      |      |             | 700.3       | 3 | 68    | LRPGAQCAEGLCCYQCR      |                                                                                         |
|      |      |             | 587.8       | 2 | 33    | IFPCAPQDVK             |                                                                                         |
| 32   | 3.07 | 16.8        | 584.3       | 2 | 40    | EQFECLVSR              | CTL; <i>T. albolabris</i> ; ~P81114                                                     |
|      |      |             | 584.3       | 2 | 38    | EQFECLVSR              |                                                                                         |
|      | 1.28 | 49.8        | 502.9       | 3 | 55    | VCSNRQCVDVNR           | SVMP; <i>Sistrurus tergeminus</i> ; ~JAS05269                                           |
|      | 0.72 | 16.7        | 410.7       | 2 | 31    | TCLGLEK                | CTL; <i>P. flavoviridis</i> ; ~BAN81993                                                 |
| 33   | 0.04 | 38.3        | 15.0        | 2 | 25    | TCLGLEK                | CTL; <i>P. jerdonii</i> ; ~PJD c52836<br>SVMP; <i>P. mucrosquamatus</i> ; ~XP_015681821 |
|      |      |             | 453.7       | 2 | 45    | YHFVANR                |                                                                                         |
|      |      |             | 505.8       | 2 | 41    | SVGIVQDHR              |                                                                                         |
|      | 0.10 | 18.5        | 627.3       | 2 | 37    | SVGIVQDHRSR            | Unknown<br>Unknown                                                                      |
|      |      |             | -           | - | -     | -                      |                                                                                         |
|      |      |             | -           | - | -     | -                      |                                                                                         |
|      | 0.01 | 17.0        | 410.7       | 2 | 31    | TCLGLEK                | CTL; <i>P. jerdonii</i> ; ~PJD c52836                                                   |

Methionine oxidation is underlined.



Supplementary table 4 Assignment of the reverse-phase chromatographic fractions from *Protobothrops mucrosquamatus* venom to protein families by nESI-MS/MS of selected peptide ions from in-gel digested protein bands separated by SDS-PAGE.

| Peak | %     | MW<br>(kDa) | Peptide Ion |   | Score | MS/MS-derived sequence      | Protein family/species/accession                               |
|------|-------|-------------|-------------|---|-------|-----------------------------|----------------------------------------------------------------|
|      |       |             | m/z         | z |       |                             |                                                                |
| 1    | 2.06  | -           | 458.8       | 4 | 61    | RLPKSKGASATSAASRPM          | BPP/CNP; <i>Protobothrops flavoviridis</i> ; ~P0C7P5           |
|      |       |             | 657.0       | 3 | 60    | HRLPKSKGASATSAASRPM         |                                                                |
|      |       |             | 485.9       | 3 | 32    | QPHESPAGGTAFR               |                                                                |
|      |       |             | 615.8       | 2 | 29    | HESPAGGTAFR                 |                                                                |
| 2    | 2.67  | -           | 523.3       | 2 | 46    | KPGRPPPISP                  | BPP/CNP; <i>Protobothrops mucrosquamatus</i> ;<br>XP_015680879 |
|      |       |             | 485.9       | 3 | 40    | QPHESPAGGTAFR               |                                                                |
|      |       |             | 459.3       | 2 | 38    | PGRPPPISP                   |                                                                |
|      |       |             | 466.6       | 3 | 33    | HQSKPGRPPPISP               |                                                                |
|      |       |             | 566.8       | 2 | 29    | SKPGRPPPISP                 |                                                                |
| 3    | 1.29  | -           | 699.4       | 2 | 54    | HQSKPGRPPPISP               | BPP/CNP; <i>P. mucrosquamatus</i> ; XP_015680879               |
|      |       |             | 630.9       | 2 | 46    | QSKPGRPPPISP                |                                                                |
|      |       |             | 523.3       | 2 | 43    | KPGRPPPISP                  |                                                                |
| 4    | 1.23  | -           | 699.4       | 2 | 51    | HQSKPGRPPPISP               | BPP/CNP; <i>P. mucrosquamatus</i> ; XP_015680879               |
| 5    | 0.83  | -           | 547.3       | 3 | 50    | SGNVNDYEVVYPRK              | Disintegrin; <i>P. mucrosquamatus</i> ; E9NW28                 |
|      |       |             | 520.8       | 2 | 37    | DYEVVYPR                    |                                                                |
| 6    | 0.38  | 13.8        | 1257.5      | 2 | 124   | GDWNDDRCTGQSADCPNGLYG       | Disintegrin; <i>P. mucrosquamatus</i> ; E9NW26                 |
|      |       |             | 784.0       | 3 | 112   | IARGDWNDDRCTGQSADCPR        |                                                                |
| 7    | 0.19  | 4.1         | 616.8       | 2 | 70    | GSGGGGGGLGSNSLR             | BPP/CNP; <i>Bothrops jararaca</i> ; ~Q6LEM5                    |
| 8    | 0.14  | 4.0         | 883.4       | 2 | 77    | FSSCGGGGGSFGAGGGFGSR        | BPP/CNP; <i>Gloydus blomhoffii</i> ; ~P01021                   |
| 9    | 0.05  | 3.4         | 709.9       | 2 | 30    | GGTAFREELSPGP               | BPP/CNP; <i>P. flavoviridis</i> ; ~P0C7P5                      |
|      |       |             | 454.7       | 2 | 28    | VHQSKPGR                    |                                                                |
| 10   | 0.17  | 4.2         | 851.4       | 1 | 52    | IGSTSGLGC                   | BPP/CNP; <i>P. mucrosquamatus</i> ; XP_015680879               |
| 11   | 0.06  | -           | 801.3       | 3 | 82    | LRPGTQCEDGECCEQCQFK         | SVMP; <i>P. mucrosquamatus</i> ; XP_015682631                  |
|      |       |             | 1467.6      | 2 | 82    | AAESEC DIAESCTGQSAECPTDDFQR |                                                                |
|      |       |             | 559.8       | 2 | 56    | LFCVQGPIGK                  |                                                                |
|      |       |             | 936.9       | 2 | 48    | NGQPCLNNGYCYNGK             |                                                                |
| 12   | 0.85  | 14.4        | 743.4       | 2 | 61    | AIVCGEKNPPCLK               | PLA <sub>2</sub> ; <i>P. mucrosquamatus</i> ; Q2PWA3           |
|      |       |             | 861.9       | 2 | 60    | AVAICLRENLTGYDK             |                                                                |
|      |       |             | 881.4       | 3 | 54    | QVCECDKAVAICLRENLTGYDK      |                                                                |
|      |       |             | 848.4       | 3 | 54    | YSYSWENKAIVCGEKNPPCLK       |                                                                |
|      |       |             | 680.9       | 2 | 52    | ENLTGYDKKHR                 |                                                                |
| 13   | 15.19 | 26.6        | 880.4       | 2 | 79    | QICECDKAAAMCFR              | PLA <sub>2</sub> ; <i>P. mucrosquamatus</i> ; Q3HLQ4           |
|      |       |             | 641.8       | 2 | 69    | AAAMCFRDNVK                 |                                                                |
|      |       |             | 722.8       | 4 | 65    | WDQYIYSWENGNIIVCGEKNPCKK    |                                                                |
|      |       |             | 739.3       | 3 | 56    | QICECDKAAAMCFRDNVK          |                                                                |

| Peak  | %    | MW<br>(kDa) | Peptide Ion |       | Score               | MS/MS-derived sequence           | Protein family/species/accession                     |                                          |                                                     |                                               |
|-------|------|-------------|-------------|-------|---------------------|----------------------------------|------------------------------------------------------|------------------------------------------|-----------------------------------------------------|-----------------------------------------------|
|       |      |             | m/z         | z     |                     |                                  |                                                      |                                          |                                                     |                                               |
| 14    | 0.89 | 17.3        | 863.1       | 4     | 55                  | KMTGKEPILSYATYGCNCGMAGVGQPVDGTDR | PLA <sub>2</sub> ; <i>P. mucrosquamatus</i> ; Q3HLQ4 |                                          |                                                     |                                               |
|       |      |             | 1145.2      | 3     | 109                 | KMTGKEPILSYATYGCNCGMAGVGQPVDGTDR |                                                      |                                          |                                                     |                                               |
|       |      |             | 1150.5      | 3     | 108                 | KMTGKEPILSYATYGCNCGMAGVGQPVDGTDR |                                                      |                                          |                                                     |                                               |
|       |      |             | 1150.5      | 3     | 107                 | KMTGKEPILSYATYGCNCGMAGVGQPVDGTDR |                                                      |                                          |                                                     |                                               |
|       |      |             | 867.1       | 4     | 106                 | KMTGKEPILSYATYGCNCGMAGVGQPVDGTDR |                                                      |                                          |                                                     |                                               |
|       |      |             | 1107.8      | 3     | 105                 | MTGKEPILSYATYGCNCGMAGVGQPVDGTDR  |                                                      |                                          |                                                     |                                               |
|       |      |             | 944.4       | 2     | 102                 | KQICECDKAAAMCFR                  |                                                      |                                          |                                                     |                                               |
|       |      |             | 827.1       | 4     | 96                  | MTGKEPILSYATYGCNCGMAGVGQPVDGTDR  |                                                      |                                          |                                                     |                                               |
|       |      |             | 722.8       | 4     | 90                  | WDQYIYSWENGNIVCGEKNPCKK          |                                                      |                                          |                                                     |                                               |
|       |      |             | 880.4       | 2     | 88                  | QICECDKAAAMCFR                   |                                                      |                                          |                                                     |                                               |
|       |      |             | 641.8       | 2     | 86                  | AAAMCFRDNVK                      |                                                      |                                          |                                                     |                                               |
|       |      |             | 1108.5      | 2     | 79                  | QICECDKAAAMCFRDNVK               |                                                      |                                          |                                                     |                                               |
|       |      |             | 837.9       | 2     | 73                  | AAAMCFRDNVKTYK                   |                                                      |                                          |                                                     |                                               |
|       |      |             | 1107.8      | 3     | 71                  | MTGKEPILSYATYGCNCGMAGVGQPVDGTDR  |                                                      |                                          |                                                     |                                               |
|       |      |             | 413.7       | 2     | 53                  | AAAMCFR                          |                                                      |                                          |                                                     |                                               |
|       |      |             | 0.33        | 14.2  | 673.9               | 3                                |                                                      | 83                                       | CGGCCDESILTCTATGKR                                  | VEGF; <i>P. mucrosquamatus</i> ; Q330K6       |
|       |      |             |             |       | 439.0               | 5                                |                                                      | 61                                       | IEVMQFKEHTACECRPR                                   | VEGF; <i>P. mucrosquamatus</i> ; XP_015676137 |
|       |      |             |             |       | 757.7               | 3                                |                                                      | 55                                       | EYPNEVSHLFKPSVPLR                                   |                                               |
|       |      |             |             |       | 471.8               | 2                                |                                                      | 43                                       | EMLVPILK                                            |                                               |
|       | 0.33 | 16.5        |             |       | 787.0               | 3                                | 45                                                   | KMTGKEPIVSYAFYGCYCGK                     | PLA <sub>2</sub> ; <i>P. flavoviridis</i> ; ~Q8JIG0 |                                               |
|       |      |             |             |       | 1116.0              | 2                                | 42                                                   | MTGKEPIVSYAFYGCYCGK                      |                                                     |                                               |
|       |      |             |             |       | 1124.0              | 2                                | 41                                                   | MTGKEPIVSYAFYGCYCGK                      |                                                     |                                               |
|       | 0.71 | 37.2        |             |       | 764.0               | 3                                | 49                                                   | YRYFYVCQYCPAGNMIGK                       | CRISP; <i>P. mucrosquamatus</i> ; P79845            |                                               |
|       |      |             | 657.6       | 3     | 43                  | YFYVCQYCPAGNMIGK                 | CRISP; <i>P. mucrosquamatus</i> ; P79845             |                                          |                                                     |                                               |
|       |      |             | 516.6       | 3     | 41                  | GGCAAAYCPSSKYR                   |                                                      |                                          |                                                     |                                               |
|       |      |             | 27.5        | 765.3 | 2                   | 63                               |                                                      | CGENIYMSPYPAK                            |                                                     |                                               |
|       |      |             | 652.0       | 3     | 59                  | SYRGGCAAAYCPSSKYR                |                                                      |                                          |                                                     |                                               |
| 614.8 |      |             | 2           | 57    | GGCAAAYCPSSK        |                                  |                                                      |                                          |                                                     |                                               |
| 750.8 |      |             | 2           | 56    | TKCPASCFCQNK        |                                  |                                                      |                                          |                                                     |                                               |
| 773.3 |      |             | 2           | 56    | CGENIYMSPYPAK       |                                  |                                                      |                                          |                                                     |                                               |
| 985.9 |      |             | 2           | 50    | YFYVCQYCPAGNMIGK    |                                  |                                                      |                                          |                                                     |                                               |
| 663.0 |      |             | 3           | 40    | YFYVCQYCPAGNMIGK    |                                  |                                                      |                                          |                                                     |                                               |
| 705.0 |      |             | 3           | 35    | VIGGIKCGENIYMSPYPAK |                                  |                                                      |                                          |                                                     |                                               |
| 774.3 |      |             | 2           | 34    | GGCAAAYCPSSKYR      |                                  |                                                      |                                          |                                                     |                                               |
| 23.0  |      |             | 614.8       | 2     | 36                  | GGCAAAYCPSSK                     |                                                      | CRISP; <i>P. mucrosquamatus</i> ; P79845 |                                                     |                                               |
|       |      |             |             | 774.3 | 2                   | 35                               |                                                      | GGCAAAYCPSSKYR                           |                                                     |                                               |
|       |      |             |             | 20.4  | 545.6               | 3                                |                                                      | 56                                       | SYRGGCAAAYCPSSK                                     | CRISP; <i>P. mucrosquamatus</i> ; P79845      |
