# Supplementary figures and images for: Phylogeny-Related Variations in Venomics: A Test in a Subset of Habu Snakes (Protobothrops)
Source: MDPI journal article supplement (doi:10.3390/toxins15050350), 2023-05-21

Figure S1

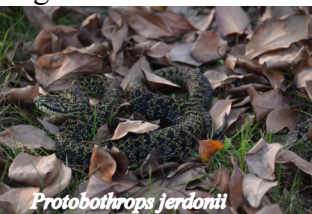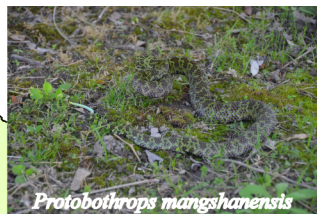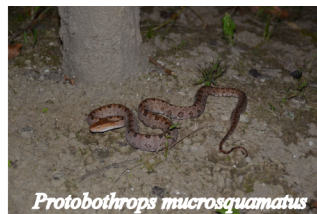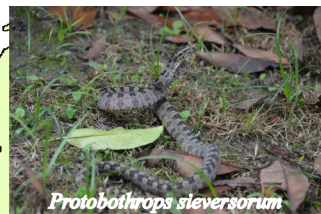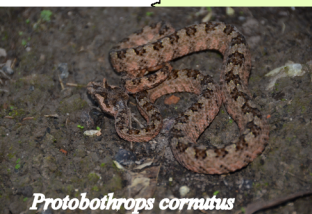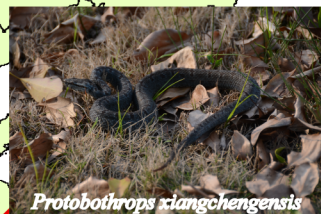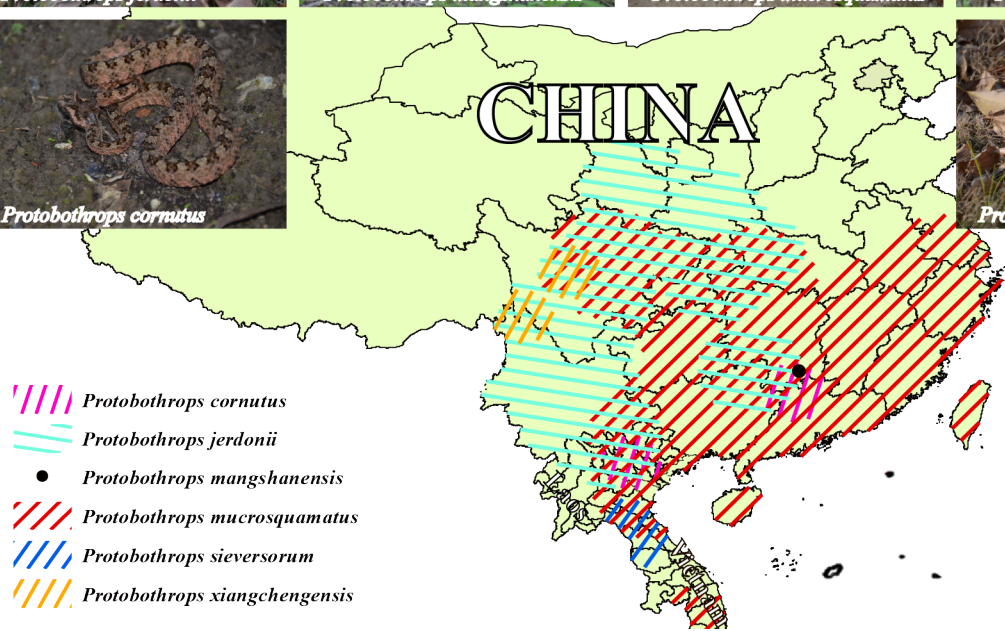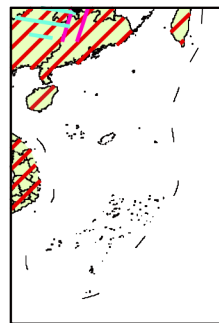

Figure S2

**A**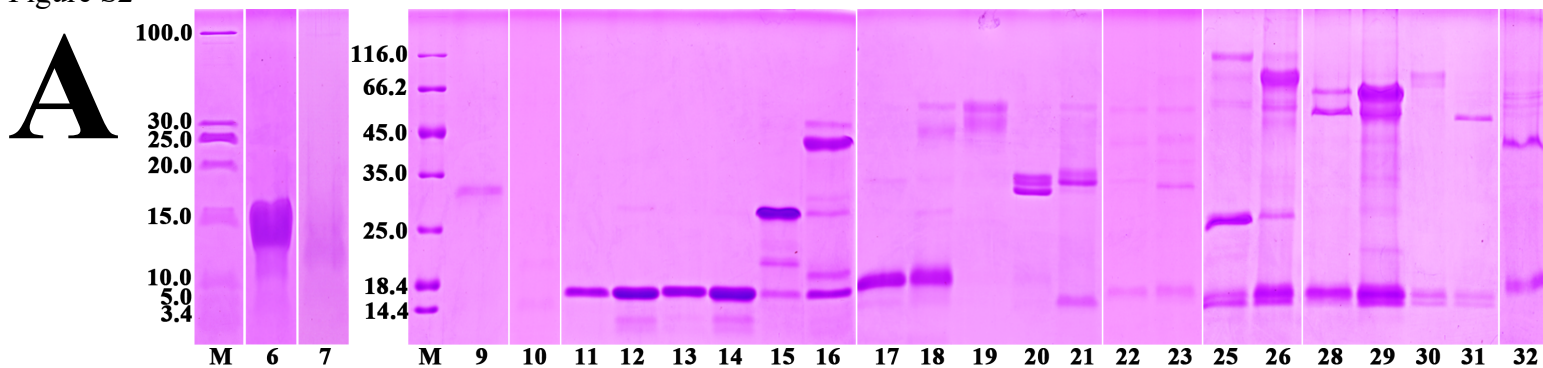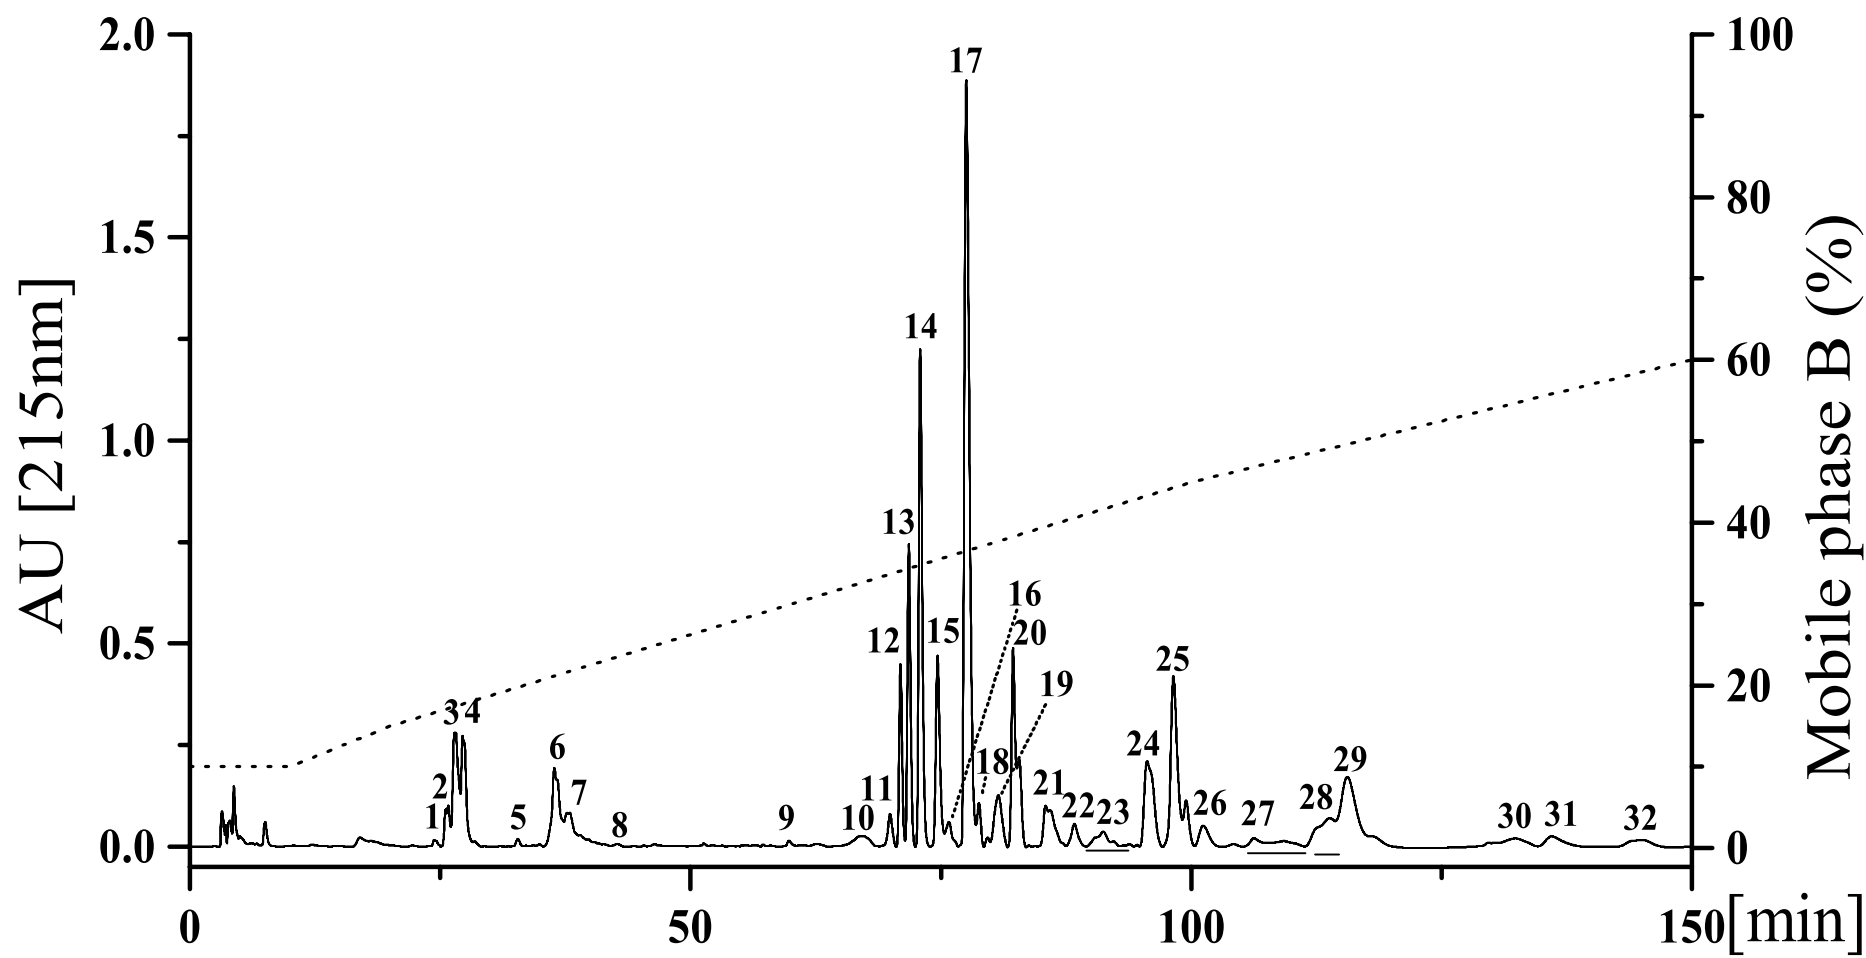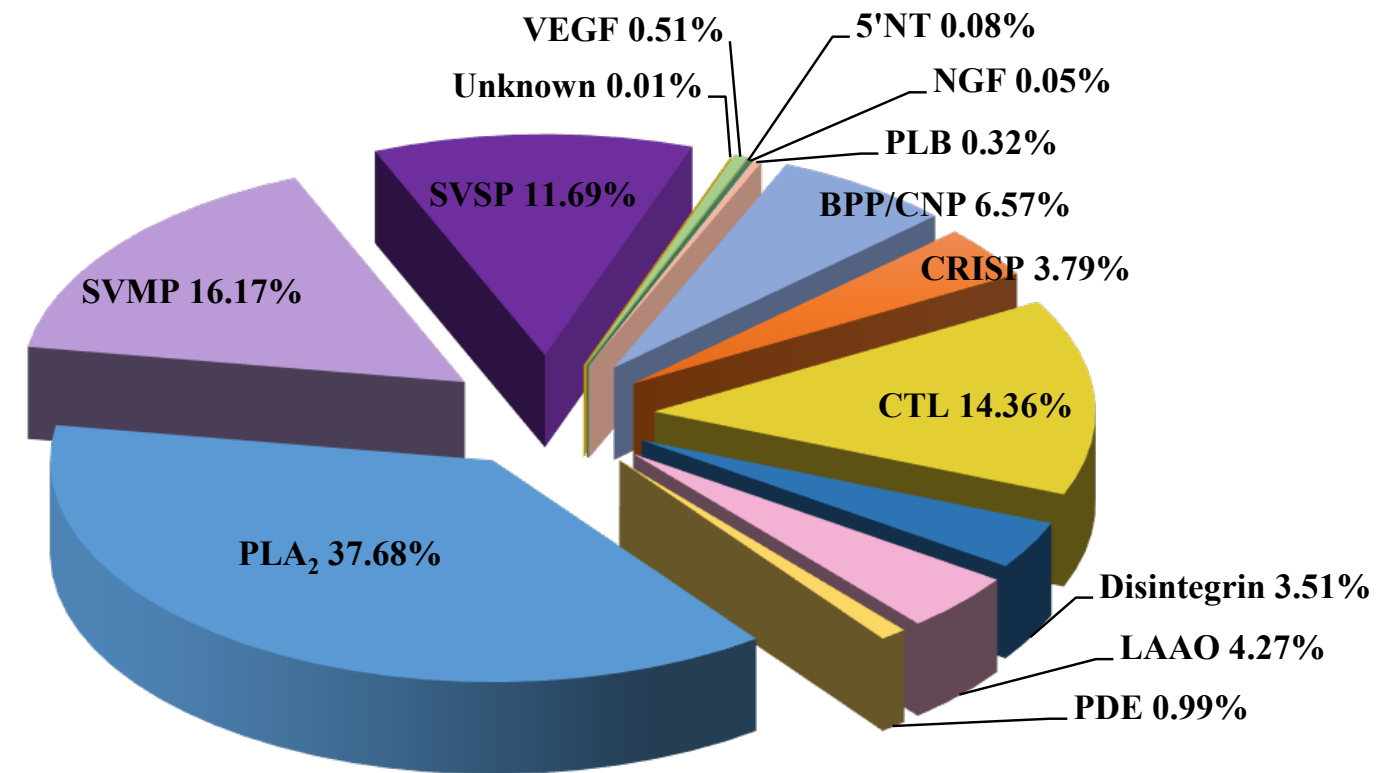



**B**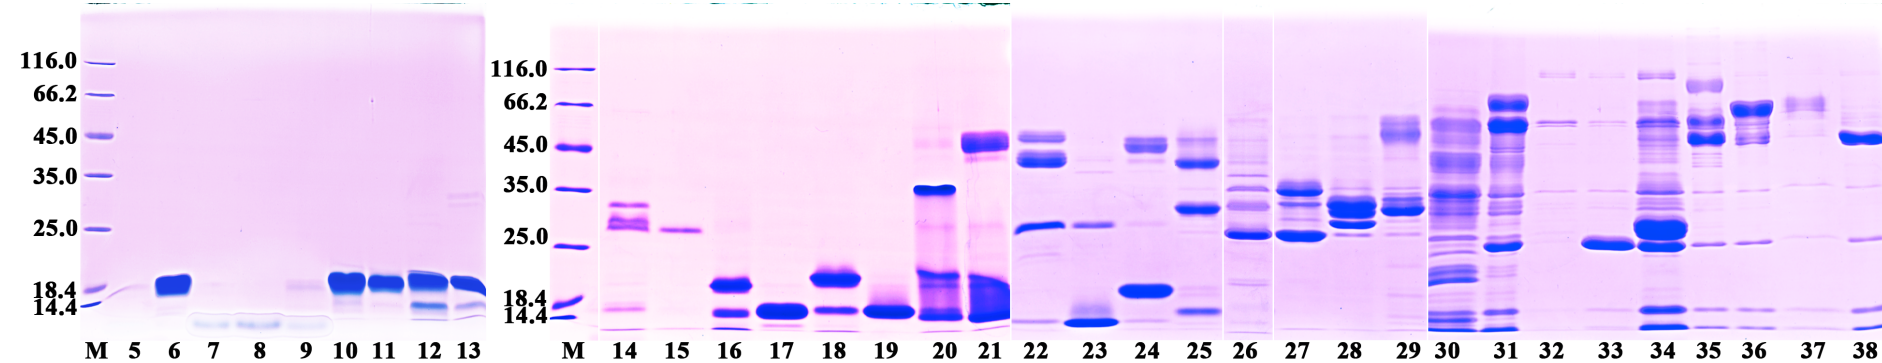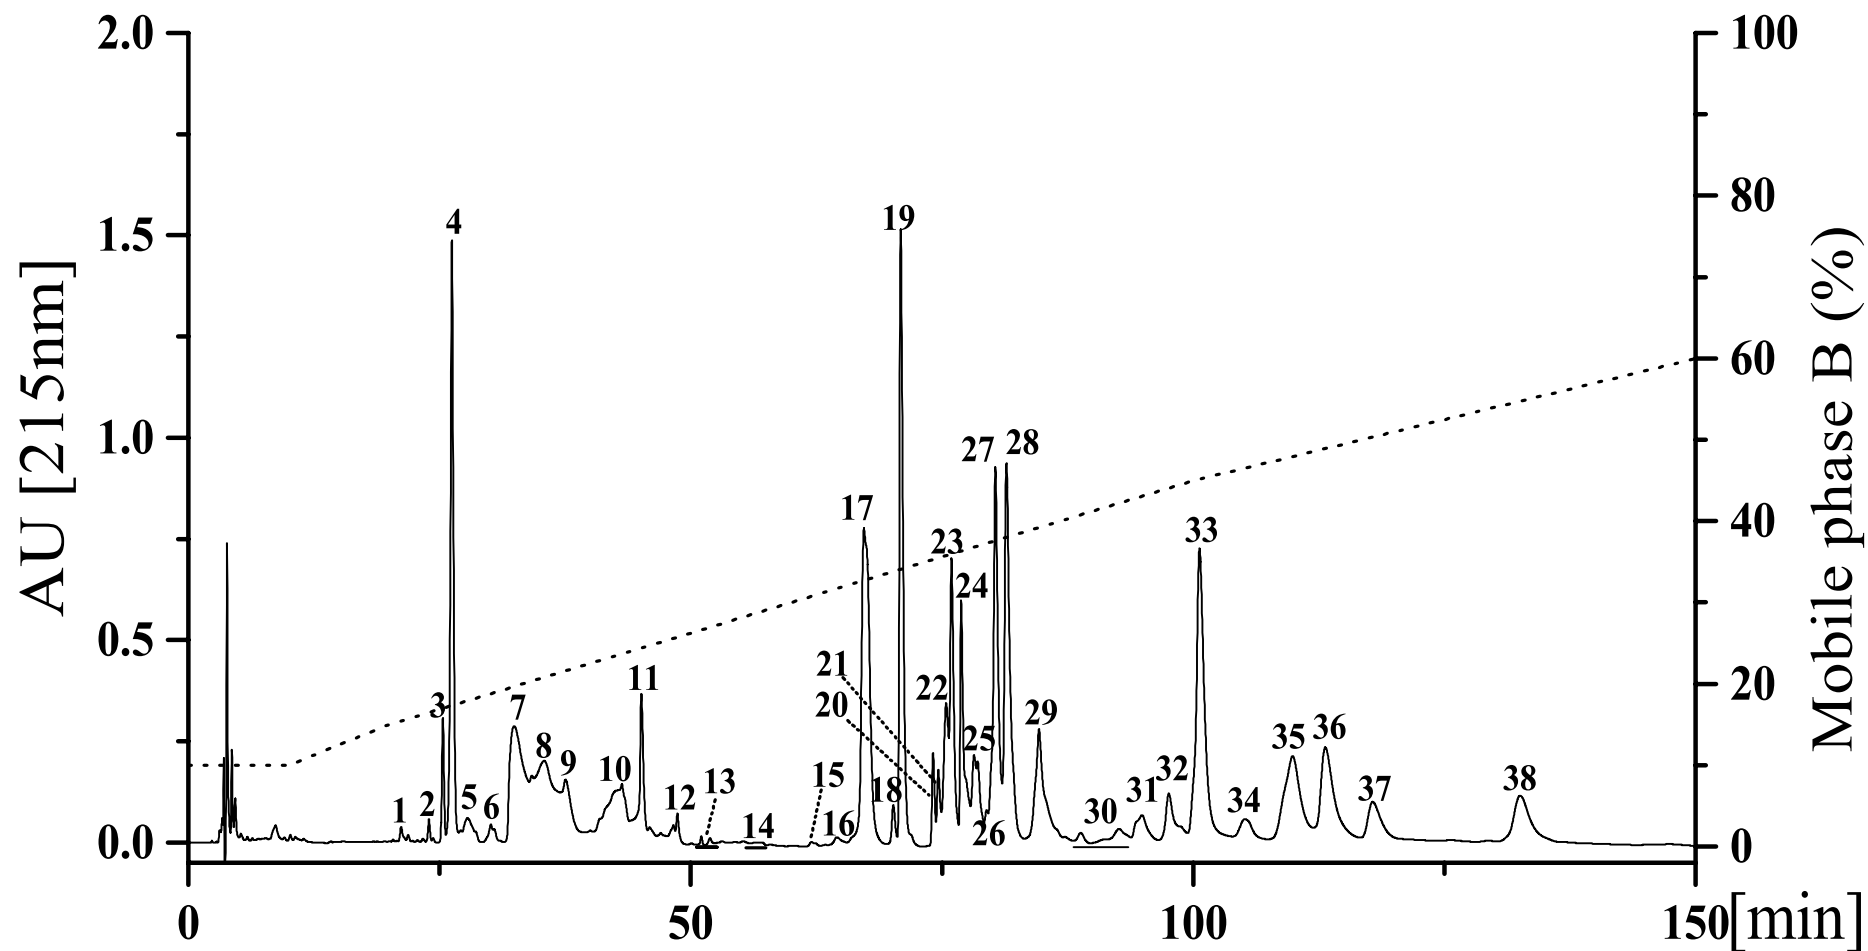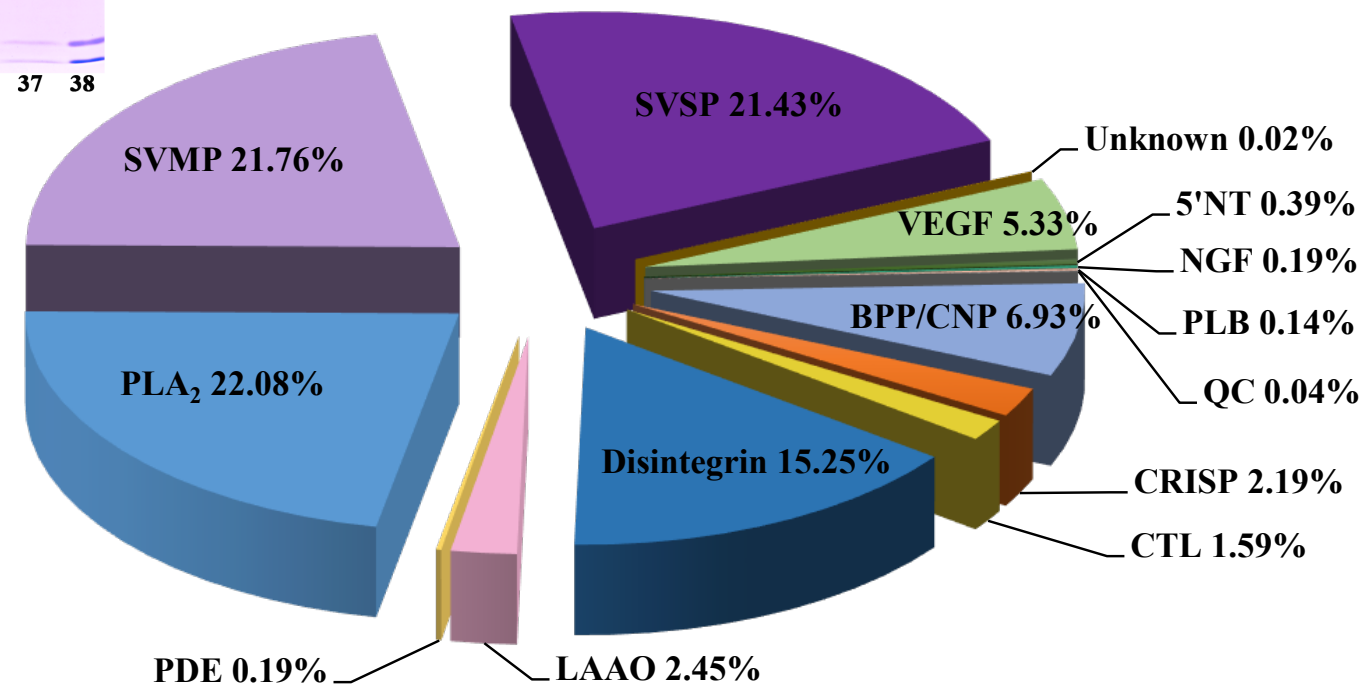

**C**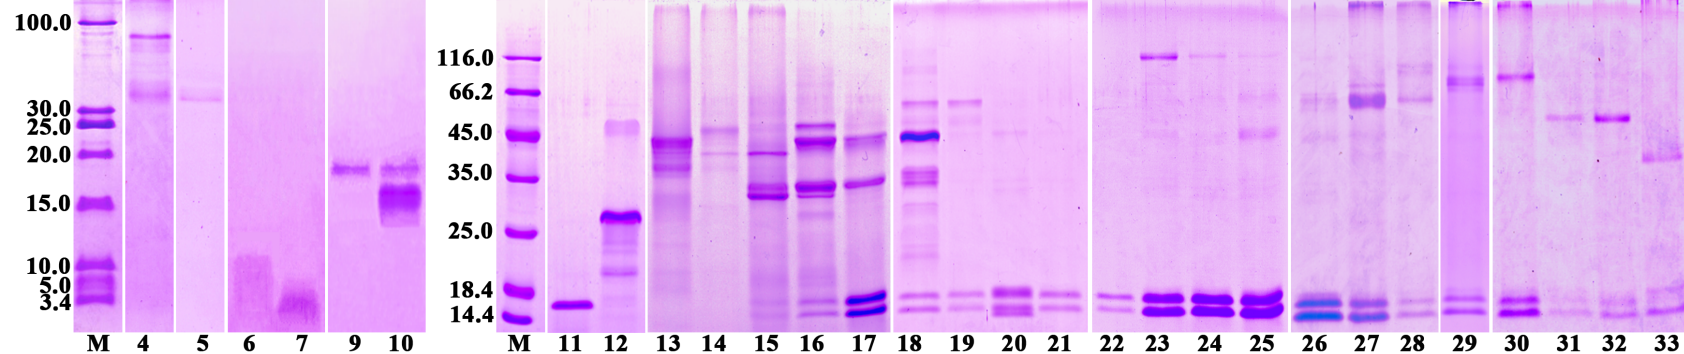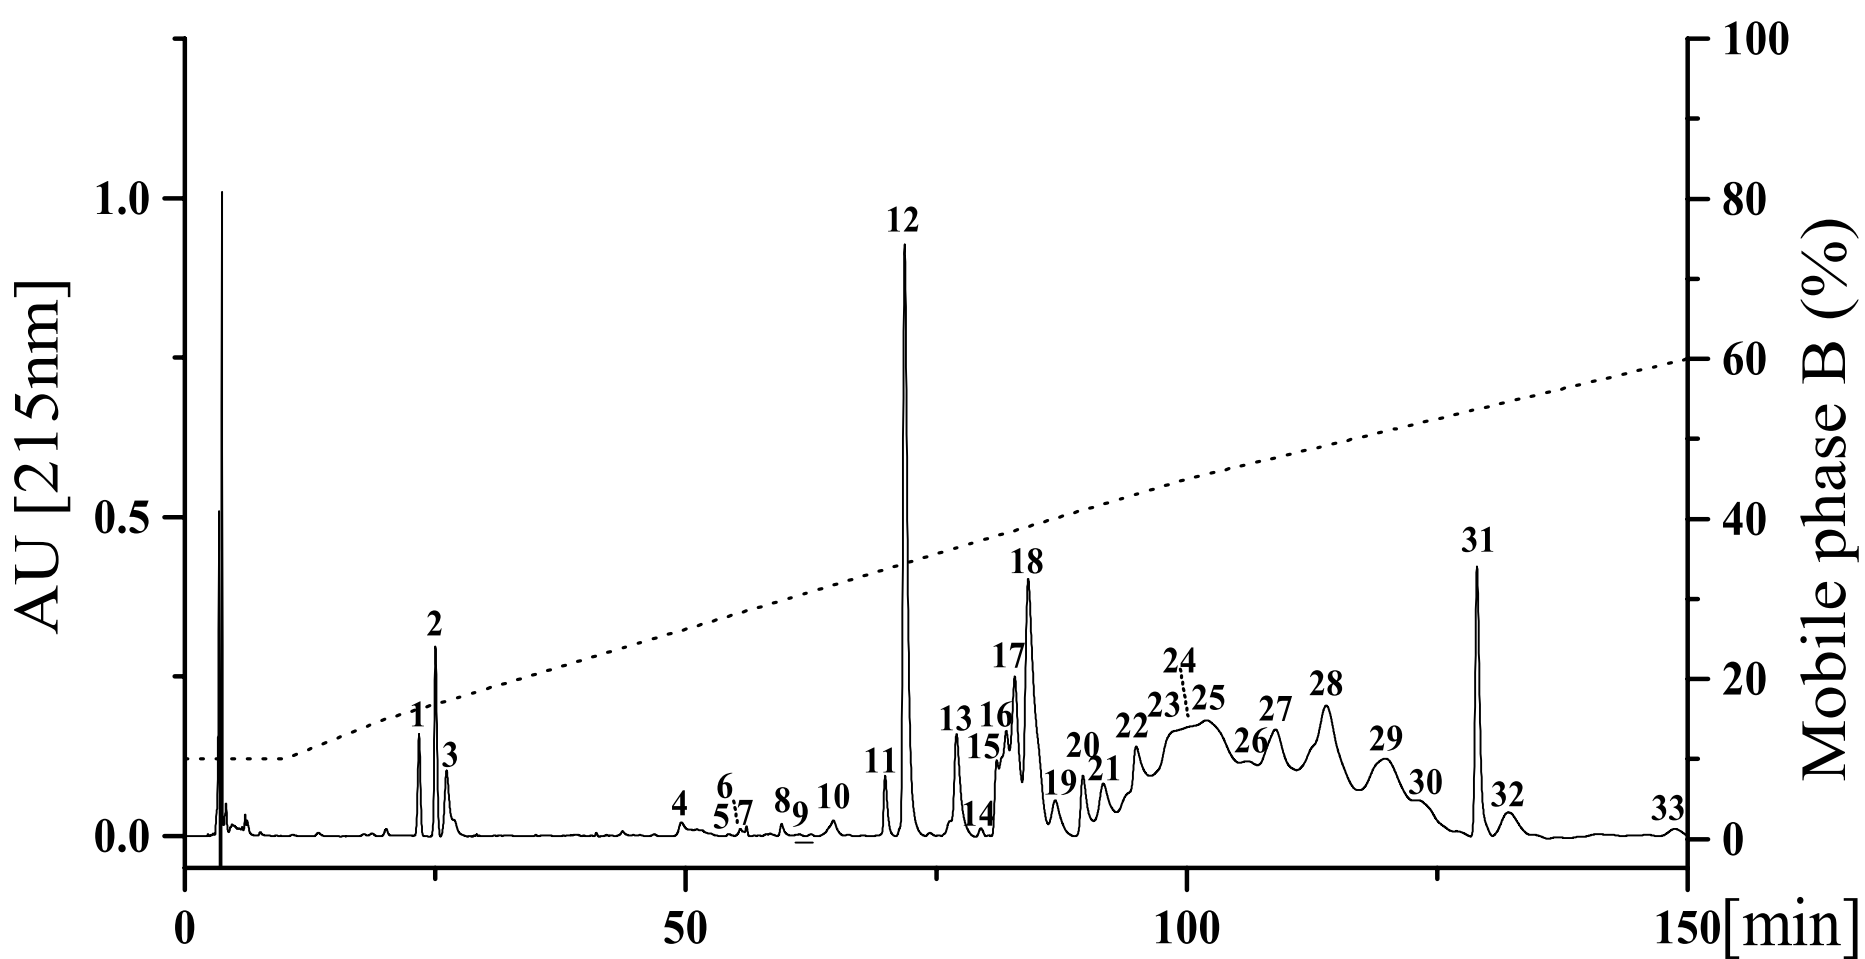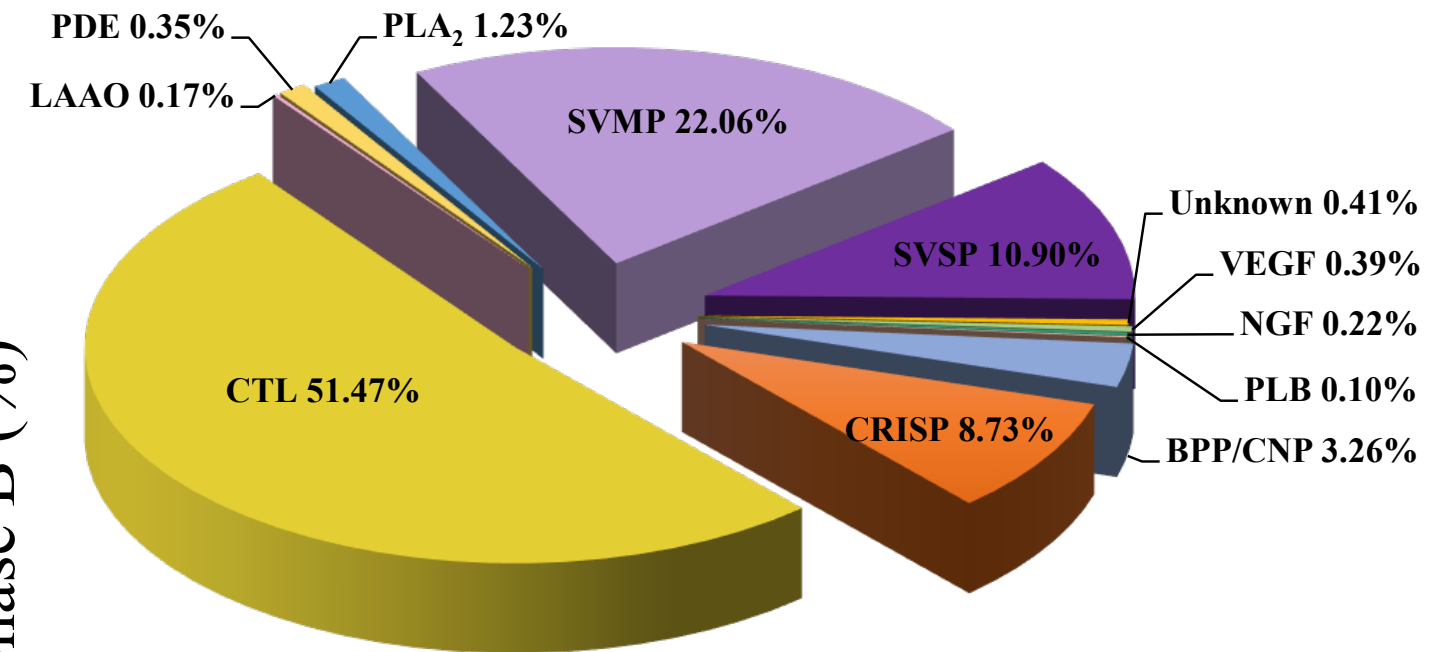

**D**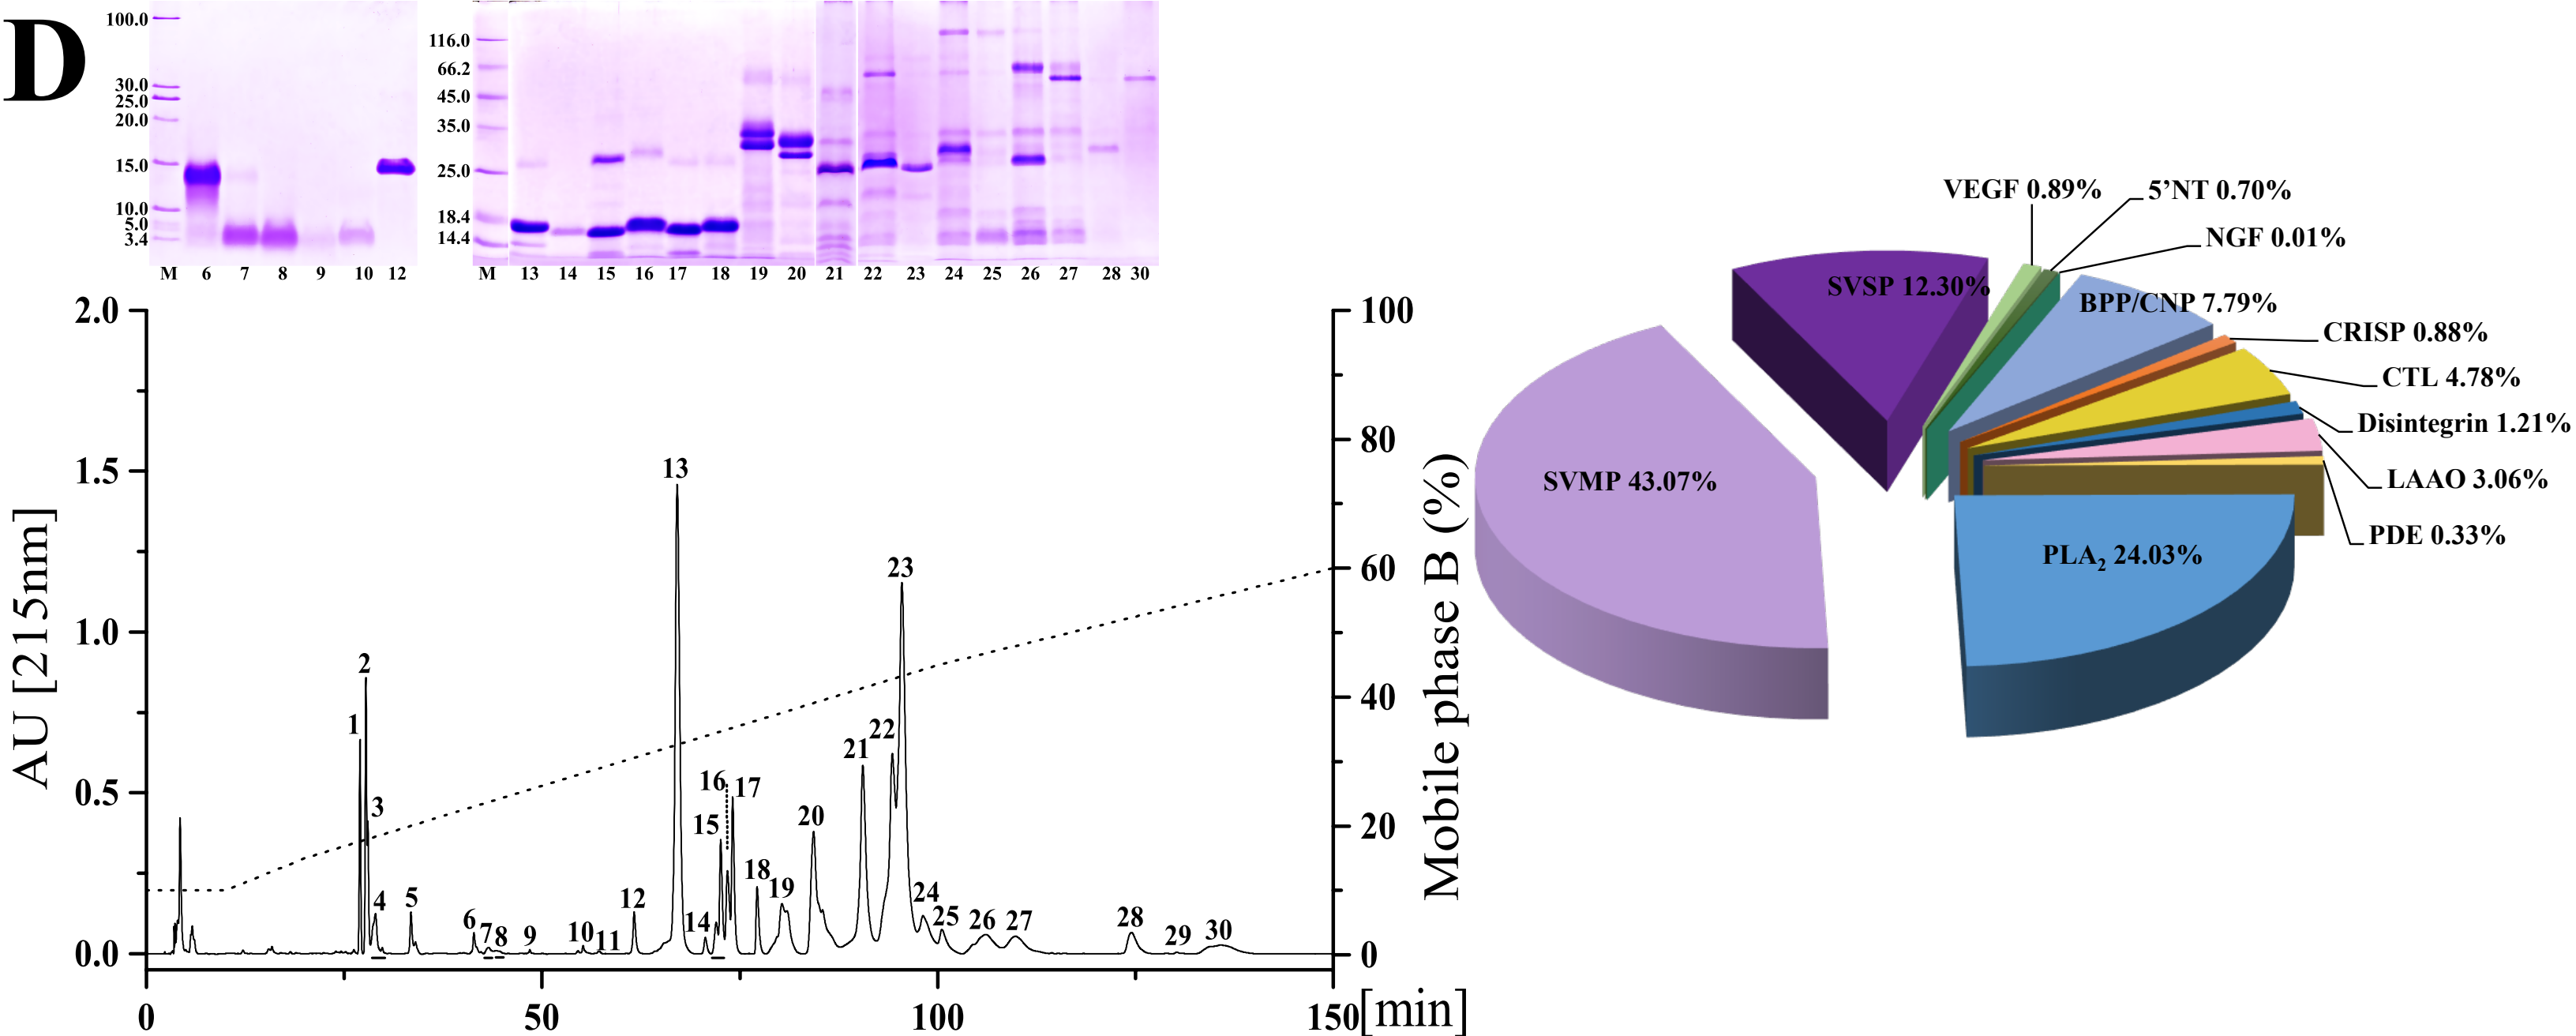

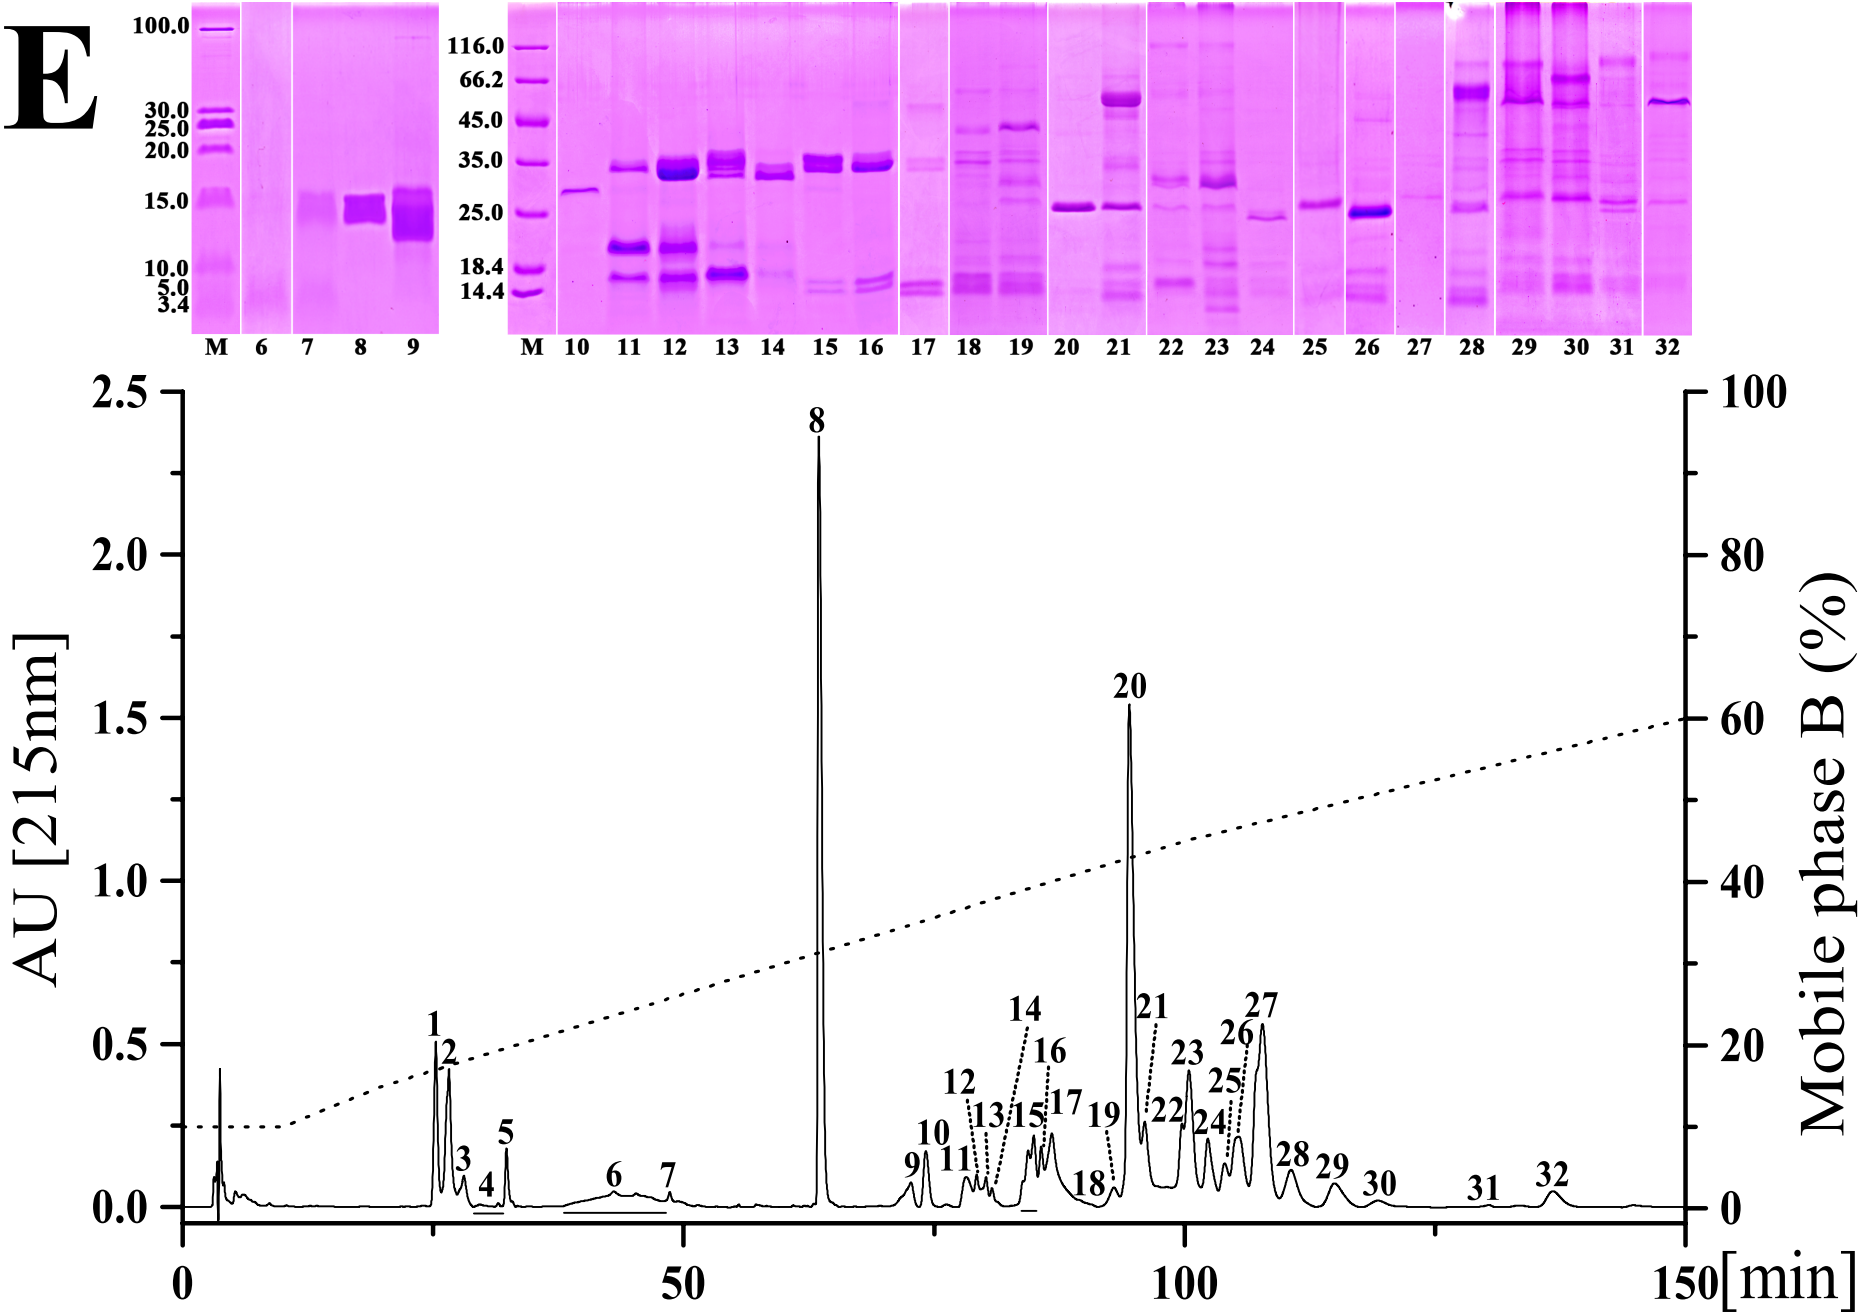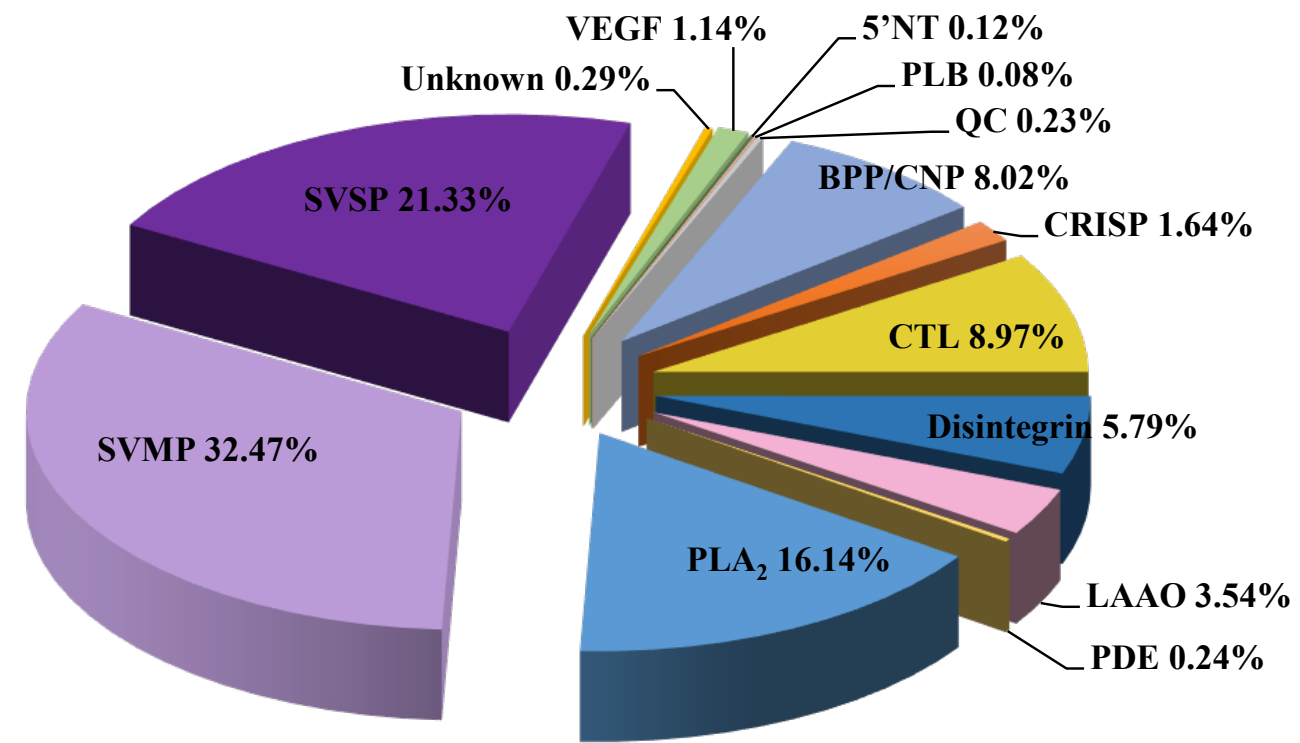



**F**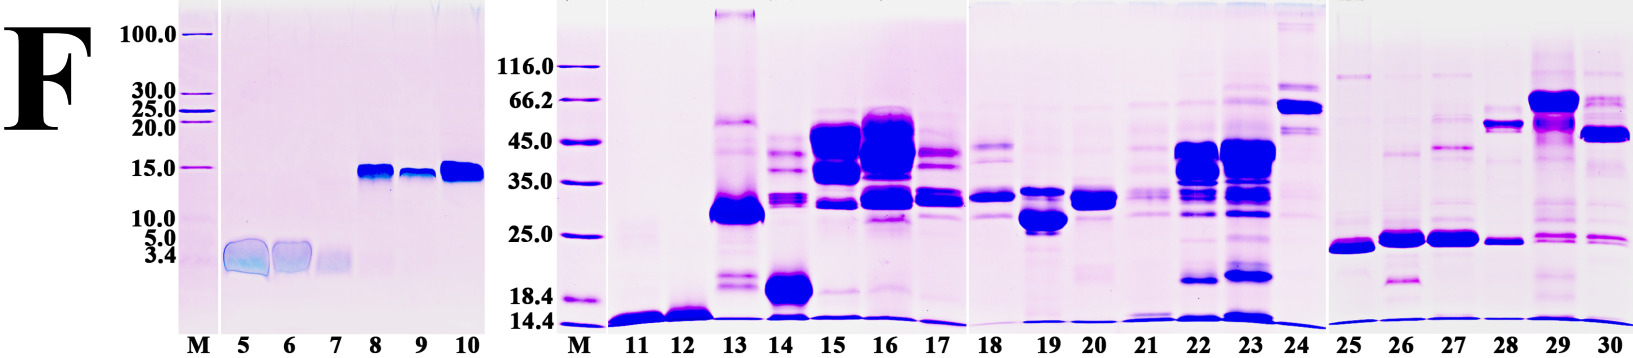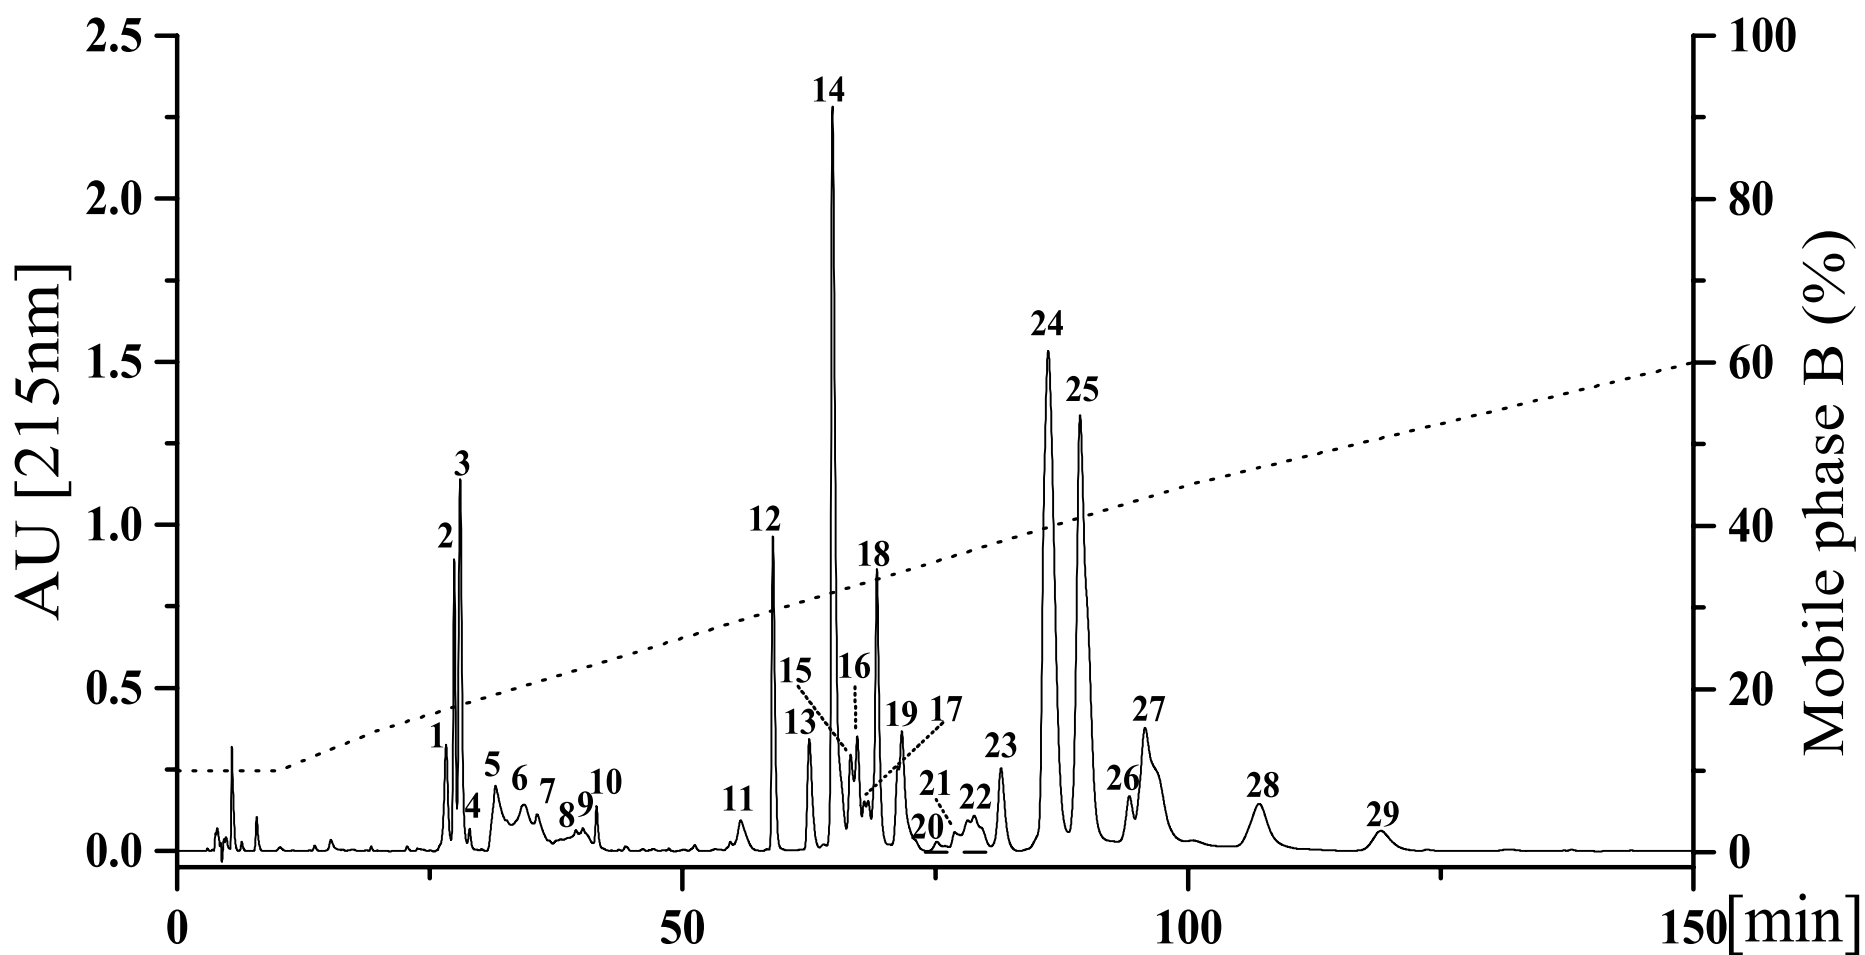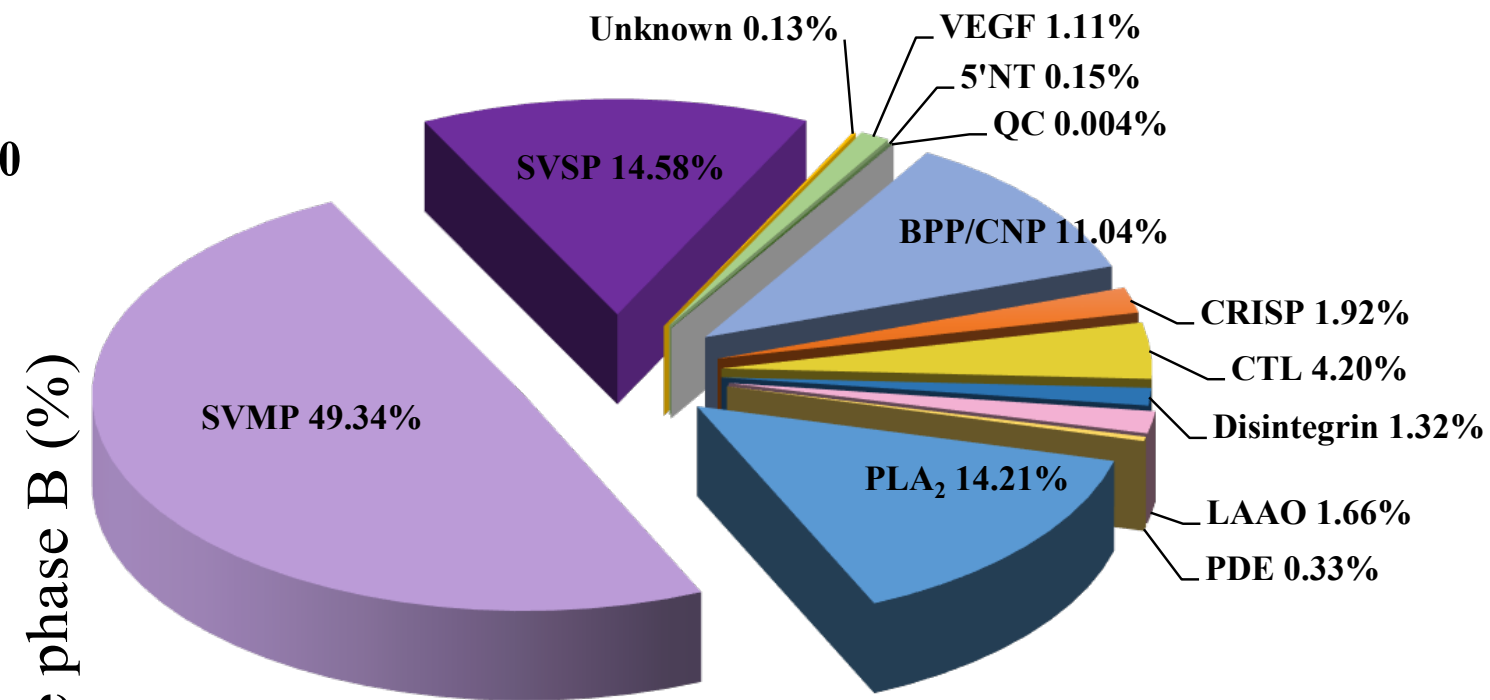

Figure S3

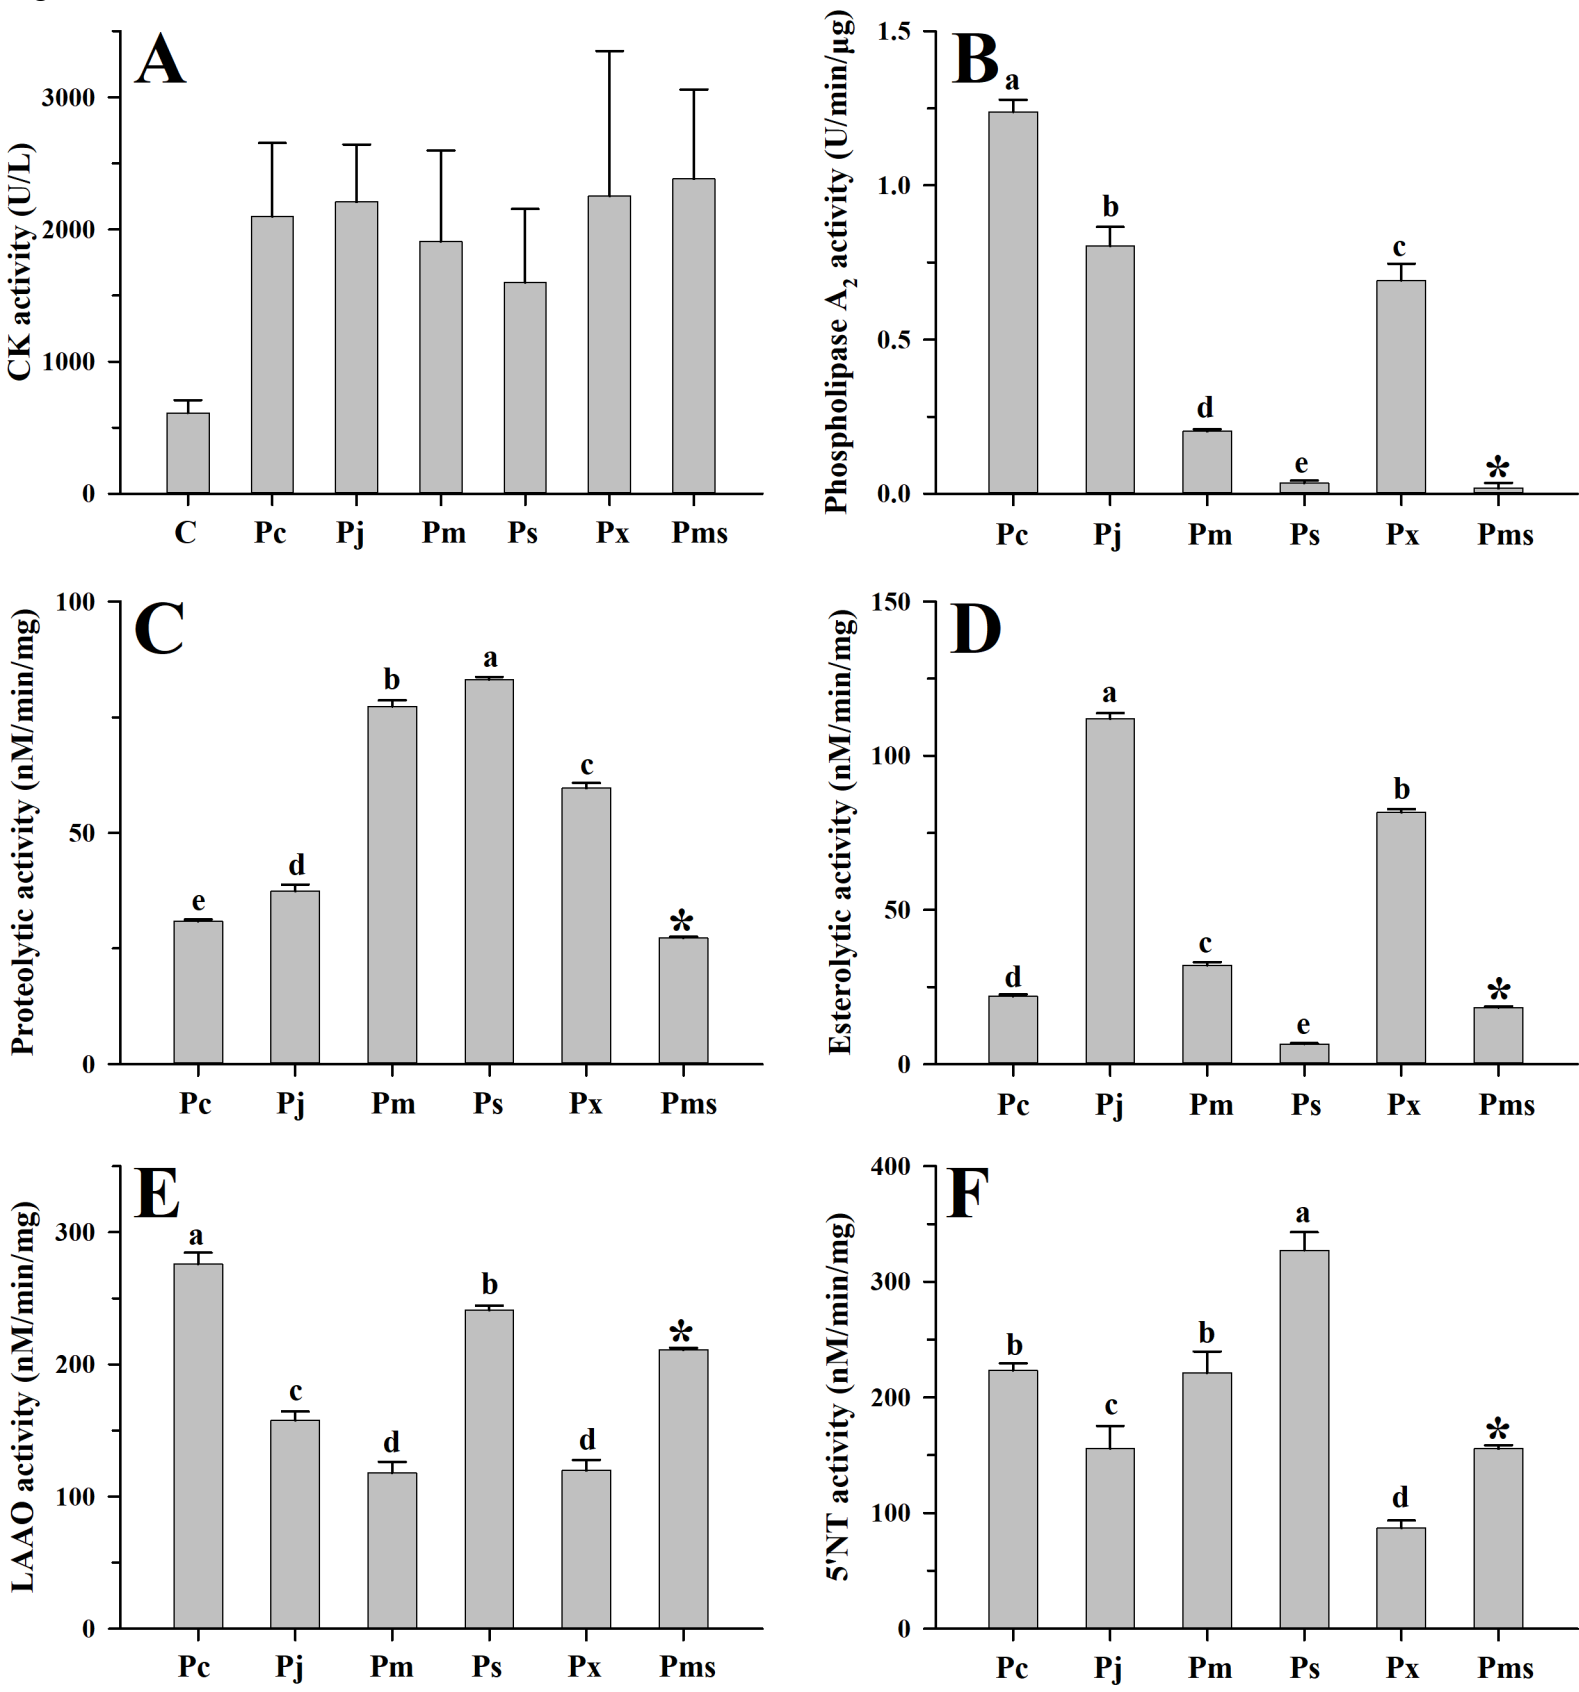

Figure S4

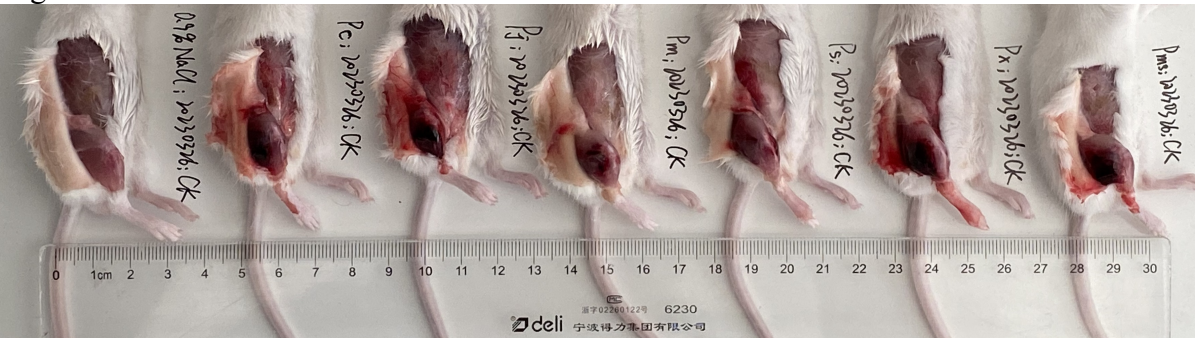

Supplement: s1 [file s1]
